# Supplementary material for: Imines with rare α-heteroatom substituted amine components generated in situ via the Staudinger/aza-Wittig tandem reaction and their application in multicomponent reactions
Source: Royal Society of Chemistry journal article supplement (doi:10.1039/d3ob01832f), 2024-01-01
Supplement: d3ob01832f1.pdf [file d3ob01832f1.pdf]

## ELECTRONIC SUPPORTING INFORMATION FOR

### **Imines with rare $\alpha$ -heteroatom substituted amine component generated in situ via Staudinger/aza-Wittig tandem and their application in multicomponent reactions**

Polina Paramonova<sup>a</sup>, Ilia Eliseev<sup>b</sup>, Dmitry Dar'in<sup>a,c</sup> and Olga Bakulina<sup>a,\*</sup>

<sup>[a]</sup> *Institute of Chemistry, Saint Petersburg State University, Saint Petersburg 199034 Russia*

<sup>[b]</sup> *Department of Chemistry, M. V. Lomonosov Moscow State University, Moscow 119991, Russia*

<sup>[c]</sup> *Saint Petersburg Research Institute of Phthisiopulmonology, Saint Petersburg, 191036 Russia*

\*Address correspondence to this author at the Institute of Chemistry, Saint Petersburg State University, 26 Universitetskiy prospekt, Peterhof 198504 Russian Federation; phone: +7 904 618 1509, fax: +7 812 428 6939. E-mail: [o.bakulina@spbu.ru](mailto:o.bakulina@spbu.ru)

#### **Table of contents**

|                                                                                     |           |
|-------------------------------------------------------------------------------------|-----------|
| <b>Table S1</b> .....                                                               | <b>2</b>  |
| <b>Crystallographic data</b> .....                                                  | <b>3</b>  |
| <b>Copies of <sup>1</sup>H, <sup>13</sup>C and <sup>19</sup>F NMR spectra</b> ..... | <b>5</b>  |
| <b>References</b> .....                                                             | <b>56</b> |

**Table S1**

Reaction conditions optimization for *in situ* imine generation from azide **1a** and *p*-anisaldehyde in presence of triphenylphosphine. Dibromomethane was used as internal standard for <sup>1</sup>H NMR spectra.

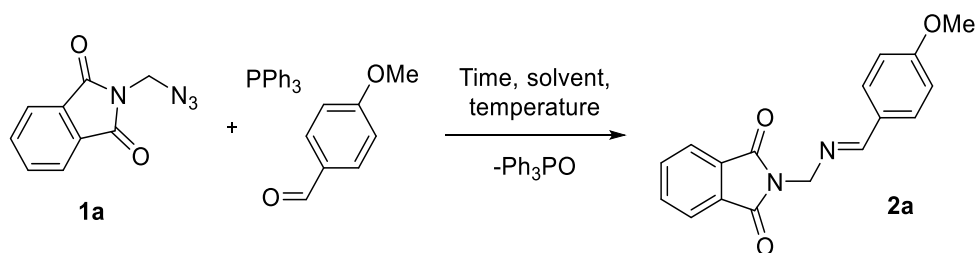

| Entry    | Solvent        | Temperature, °C | Time, h   | Yield, %<br>(NMR) |
|----------|----------------|-----------------|-----------|-------------------|
| 1        | toluene        | 60              | 16        | 70                |
| <b>2</b> | <b>toluene</b> | <b>80</b>       | <b>16</b> | <b>81</b>         |
| 3        | toluene        | 110             | 16        | 67                |
| 4        | toluene        | 130             | 16        | 68                |
| 5        | toluene        | 80              | 3         | 69                |
| 6        | toluene        | 80              | 6         | 68                |
| 7        | MeCN           | 80              | 16        | 77                |
| 8        | DMSO           | 80              | 16        | 34                |
| 9        | DCE            | 80              | 16        | 26                |
| 10       | DMF            | 80              | 16        | 69                |

### Crystallographic data

Single crystal X-ray data were obtained using an Agilent Technologies SuperNova Atlas diffractometer. Crystals were kept at 100(2) K during data collection. Using Olex2<sup>1</sup>, the structure was solved with the SHELXT<sup>2</sup> structure solution program using Intrinsic Phasing and refined with the SHELXL<sup>3</sup> refinement package using Least Squares minimisation. Deposition number 2261122 (**6a**) contains the supplementary crystallographic data for this paper. These data are provided free of charge by the joint Cambridge Crystallographic Data Centre and Fachinformationszentrum Karlsruhe Access Structures service [www.ccdc.cam.ac.uk/structures](http://www.ccdc.cam.ac.uk/structures).

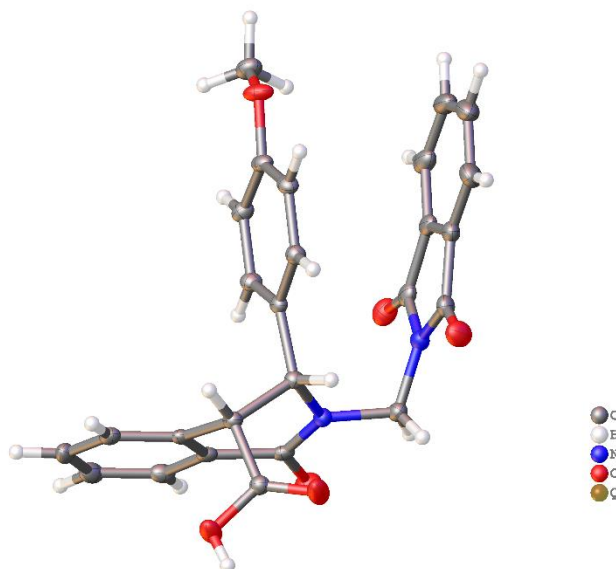

**Figure S1.** ORTEP representation of compound **6a** drawn at 50% probability level.

**Table S2.** Crystal data and structure refinement for **6a**.

|                                        |                                                               |
|----------------------------------------|---------------------------------------------------------------|
| <b>Identification code</b>             | <b>1ver0-23431_PPS-376_auto</b>                               |
| <b>Empirical formula</b>               | C <sub>26</sub> H <sub>20</sub> N <sub>2</sub> O <sub>6</sub> |
| <b>Formula weight</b>                  | 456.458                                                       |
| <b>Temperature/K</b>                   | 100.15                                                        |
| <b>Crystal system</b>                  | monoclinic                                                    |
| <b>Space group</b>                     | P2 <sub>1</sub> /n                                            |
| <b>a/Å</b>                             | 8.3756(1)                                                     |
| <b>b/Å</b>                             | 10.9149(2)                                                    |
| <b>c/Å</b>                             | 23.5070(4)                                                    |
| <b>α/°</b>                             | 90                                                            |
| <b>β/°</b>                             | 95.279(2)                                                     |
| <b>γ/°</b>                             | 90                                                            |
| <b>Volume/Å<sup>3</sup></b>            | 2139.87(6)                                                    |
| <b>Z</b>                               | 4                                                             |
| <b>ρ<sub>calc</sub>/cm<sup>3</sup></b> | 1.417                                                         |
| <b>μ/mm<sup>-1</sup></b>               | 0.845                                                         |
| <b>F(000)</b>                          | 955.4                                                         |
| <b>Radiation</b>                       | Cu Kα (λ = 1.54184)                                           |
| <b>2θ range for data collection/°</b>  | 7.56 to 152.48                                                |
| <b>Index ranges</b>                    | -10 ≤ h ≤ 9, -9 ≤ k ≤ 13, -29 ≤ l ≤ 27                        |
| <b>Reflections collected</b>           | 10915                                                         |
| <b>Independent reflections</b>         | 4377 [R <sub>int</sub> = 0.0413, R <sub>sigma</sub> = 0.0390] |

|                                                   |                                                   |
|---------------------------------------------------|---------------------------------------------------|
| <b>Data/restraints/parameters</b>                 | 4377/0/309                                        |
| <b>Goodness-of-fit on F<sup>2</sup></b>           | 1.058                                             |
| <b>Final R indexes [I&gt;2σ (I)]</b>              | R <sub>1</sub> = 0.0434, wR <sub>2</sub> = 0.1147 |
| <b>Final R indexes [all data]</b>                 | R <sub>1</sub> = 0.0534, wR <sub>2</sub> = 0.1225 |
| <b>Largest diff. peak/hole / e Å<sup>-3</sup></b> | 0.41/-0.32                                        |

Copies of  $^1\text{H}$ ,  $^{13}\text{C}$  and  $^{19}\text{F}$  NMR spectra  
 $^1\text{H}$  and  $^{13}\text{C}$  NMR spectra of compound **1d**

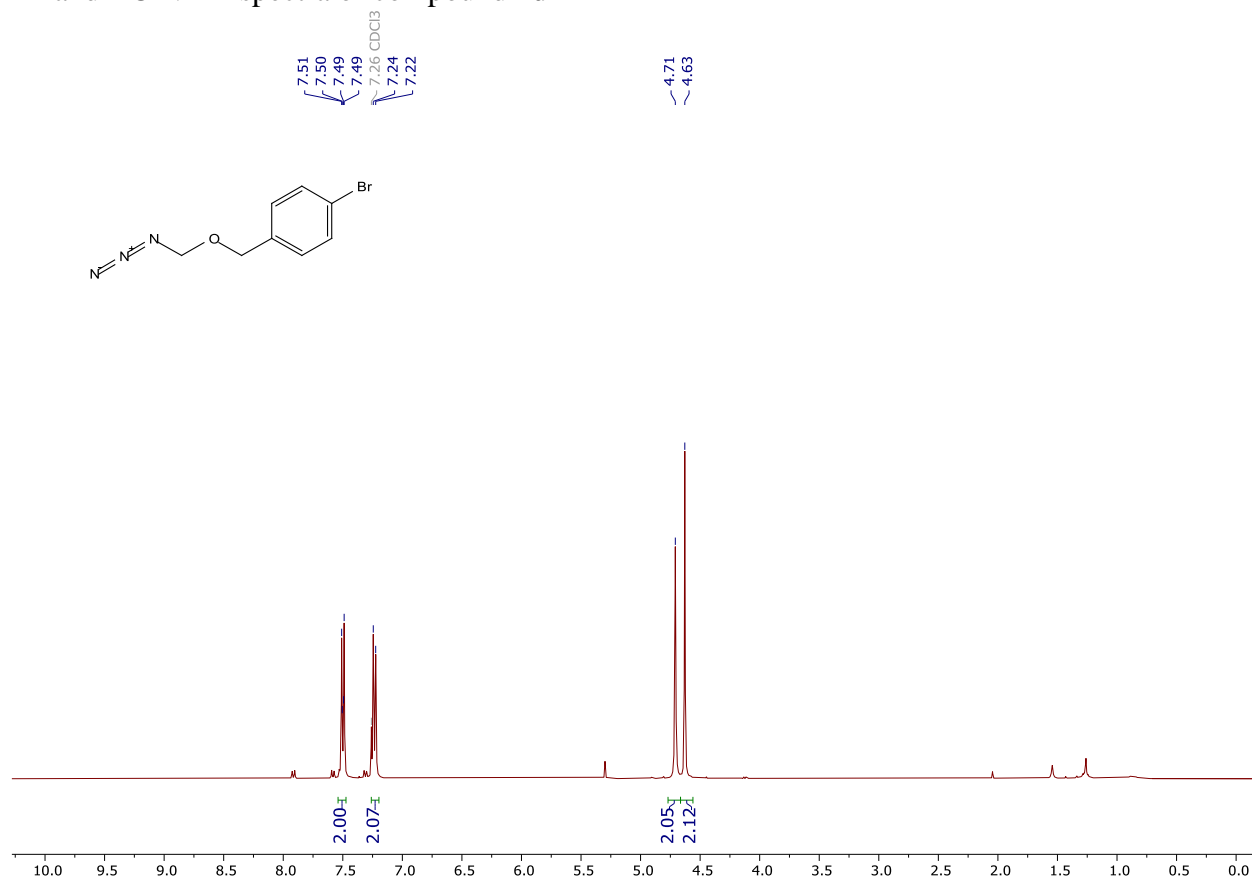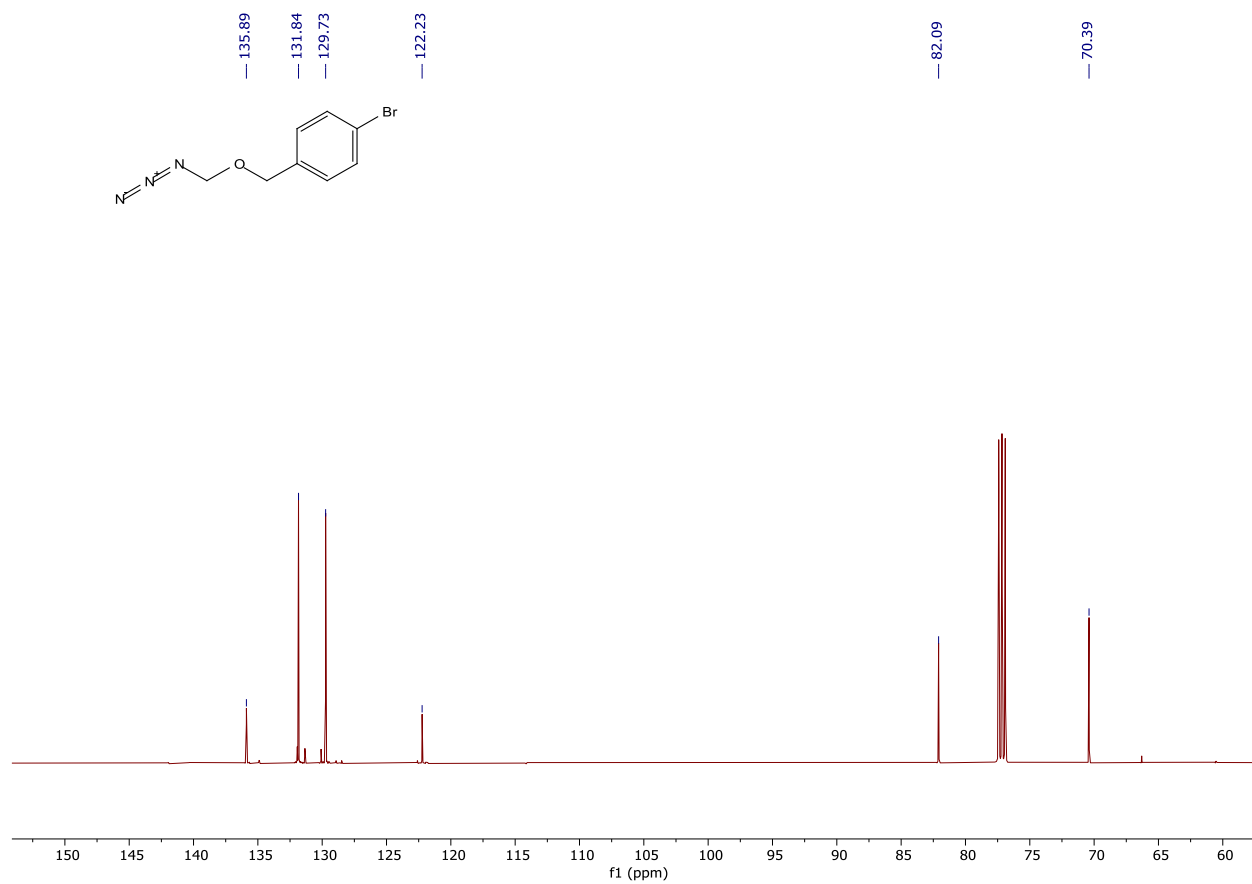

$^1\text{H}$ ,  $^{13}\text{C}$  and  $^{19}\text{F}$  NMR spectra of compound **4a**

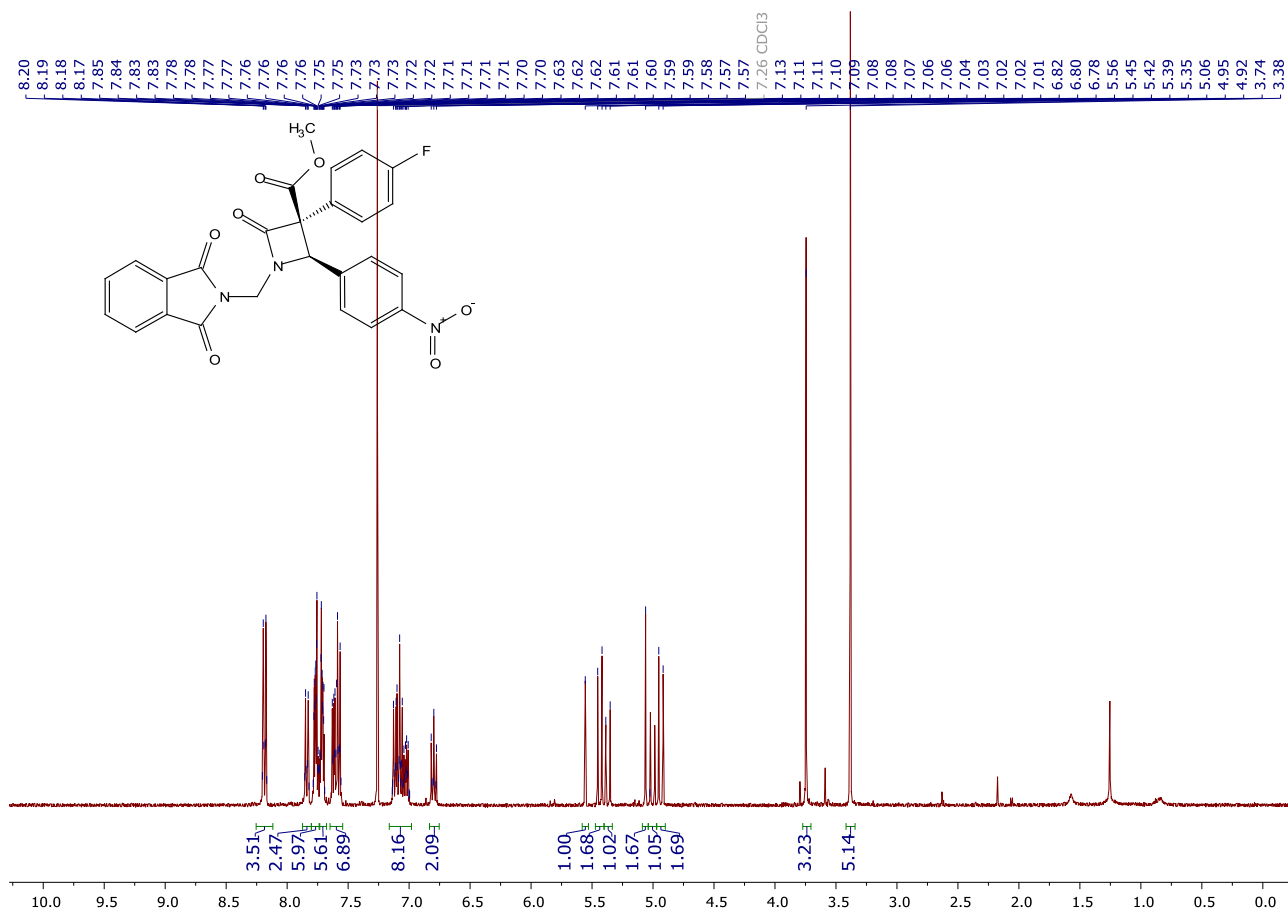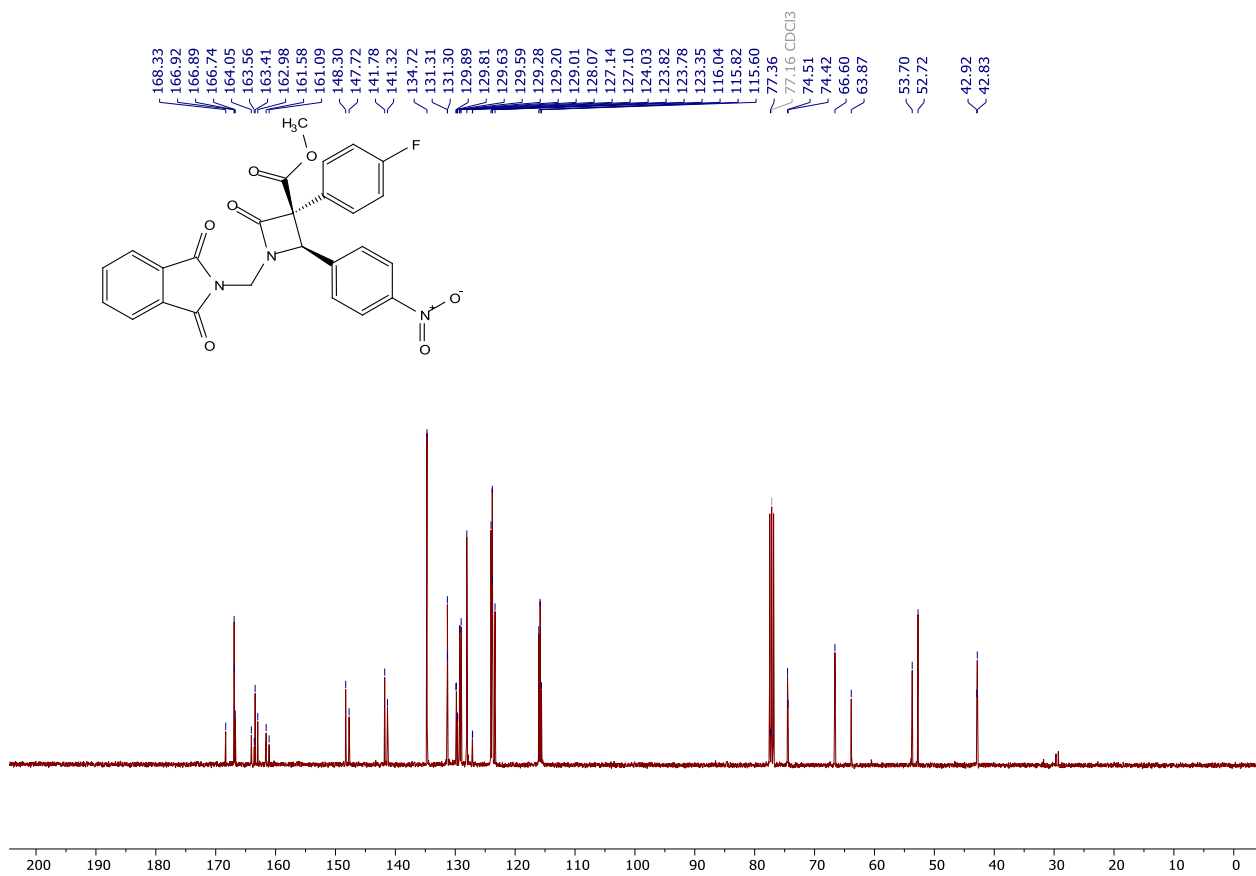

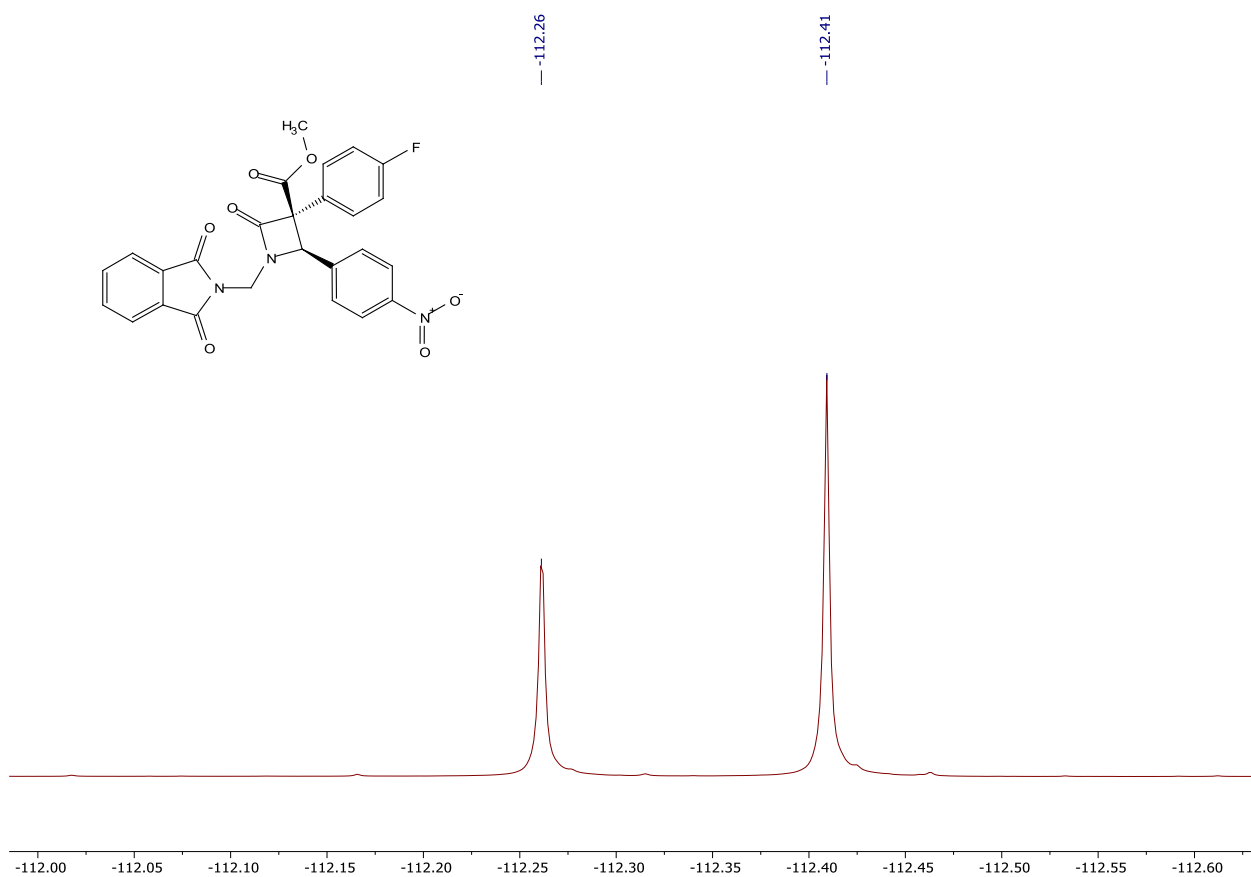

$^1\text{H}$ ,  $^{13}\text{C}$  and  $^{19}\text{F}$  NMR spectra of compound **4b**

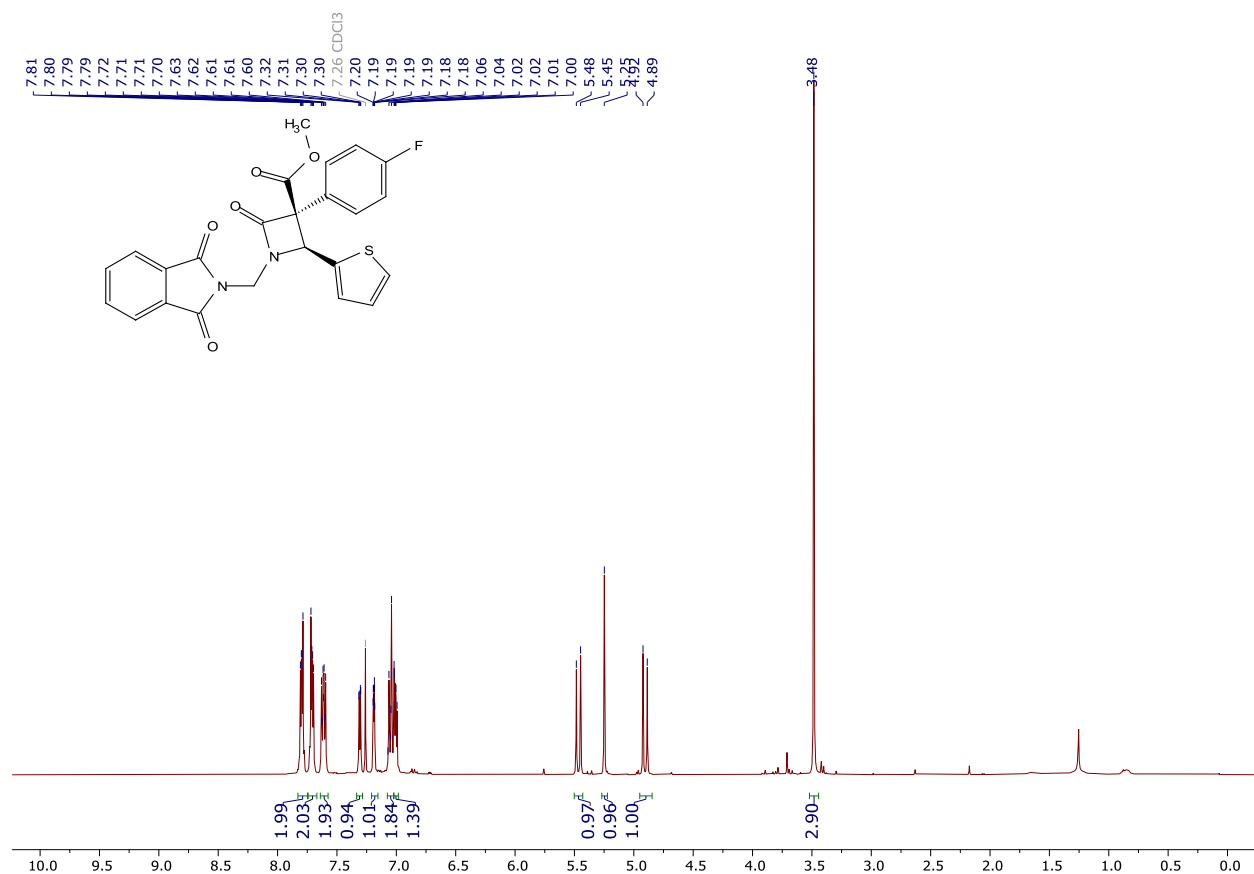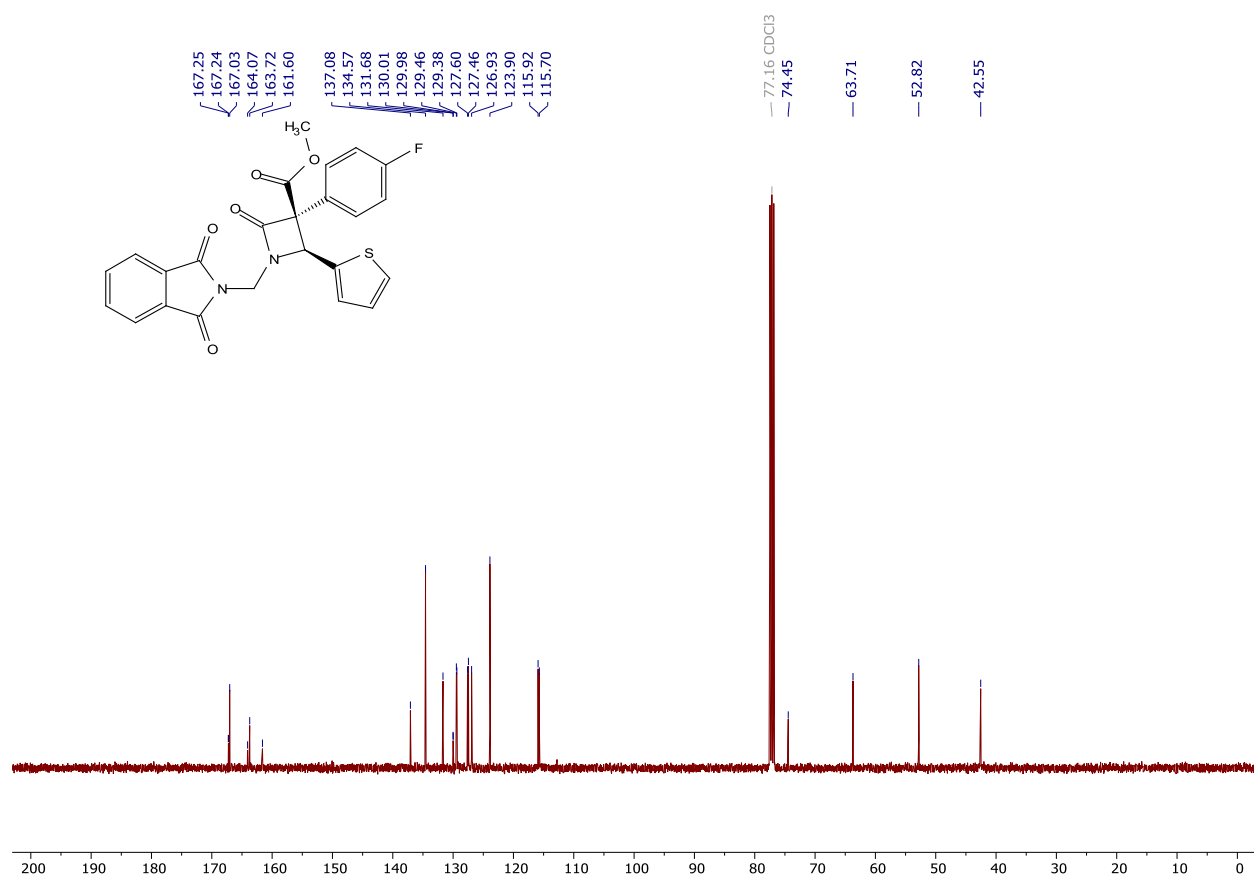



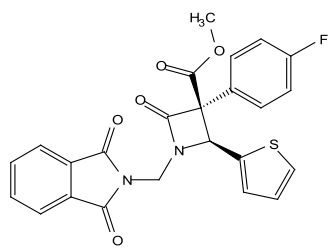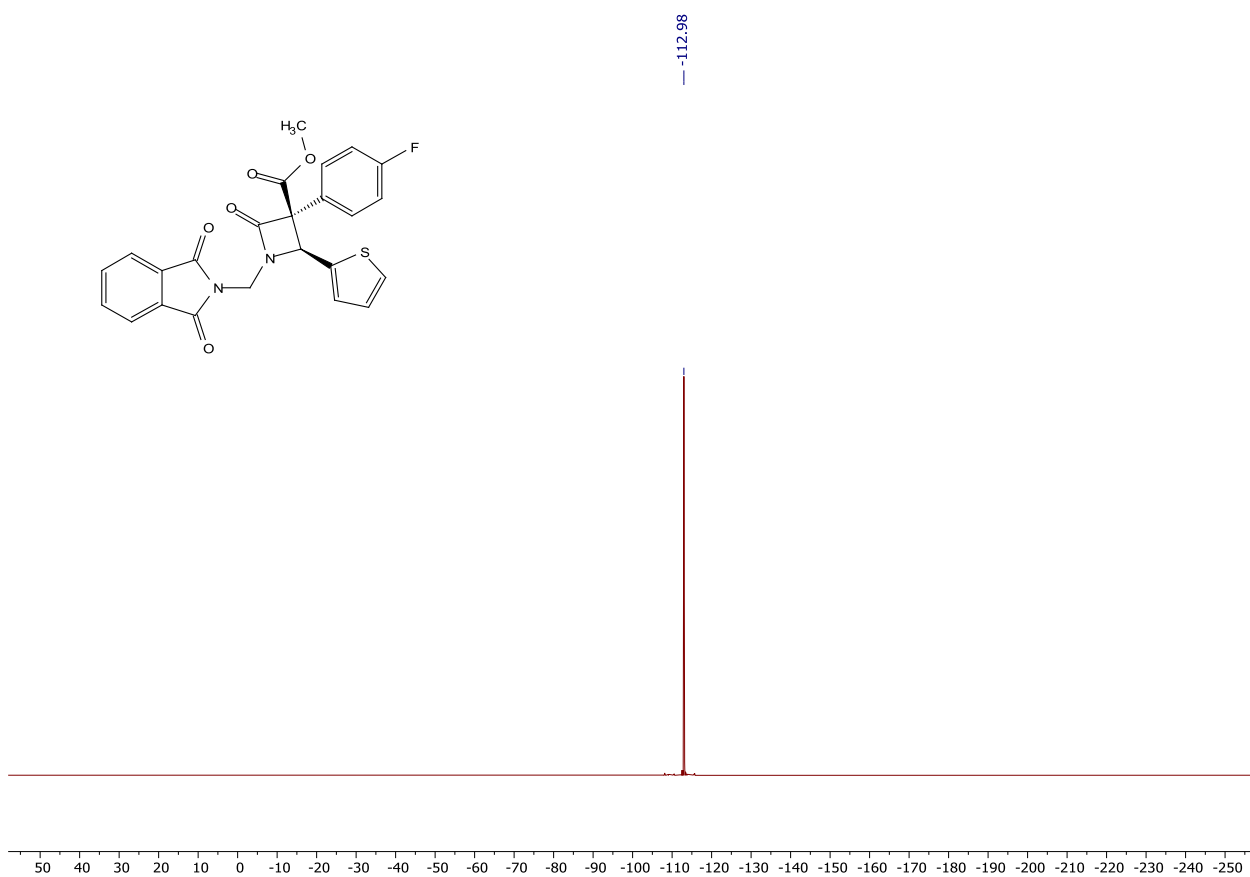

$^1\text{H}$ ,  $^{13}\text{C}$  and  $^{19}\text{F}$  NMR spectra of compound **4c**

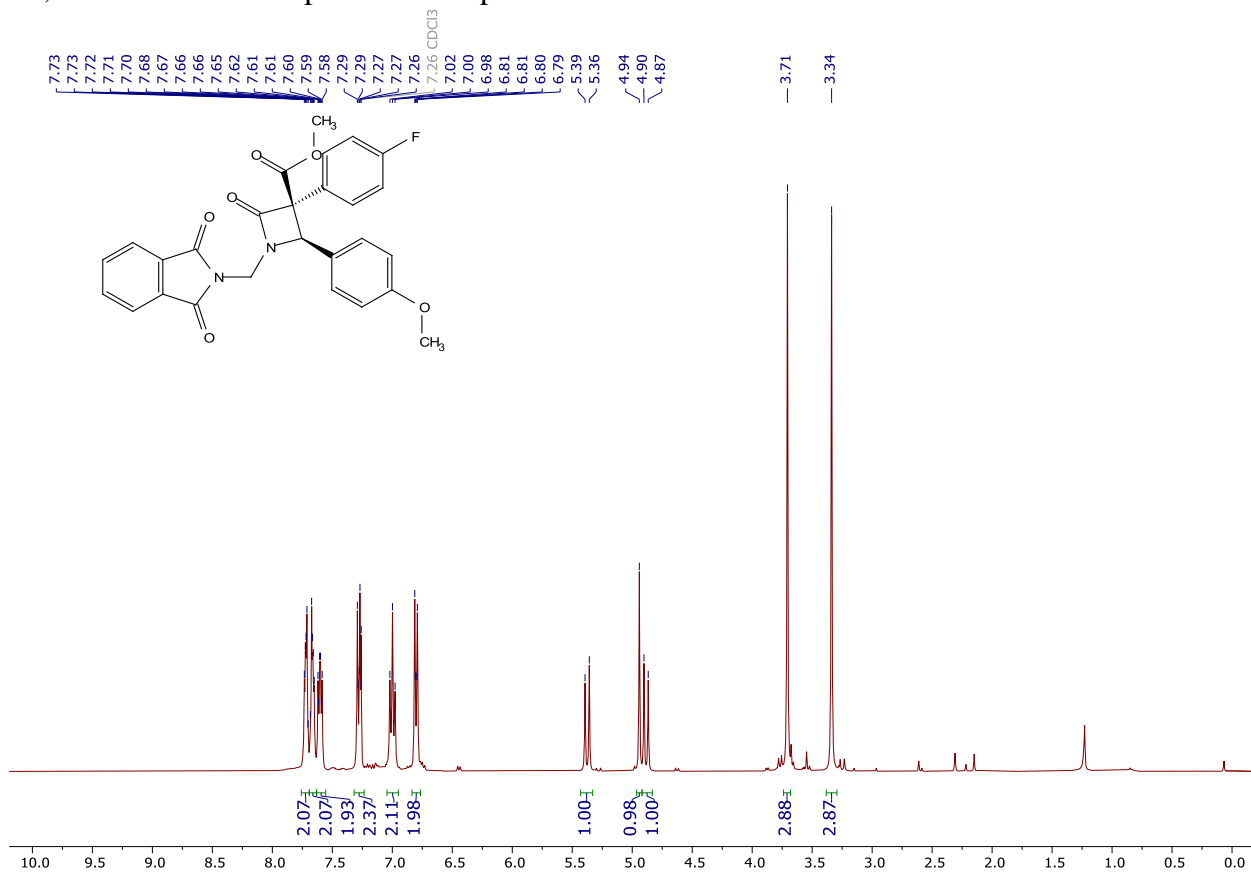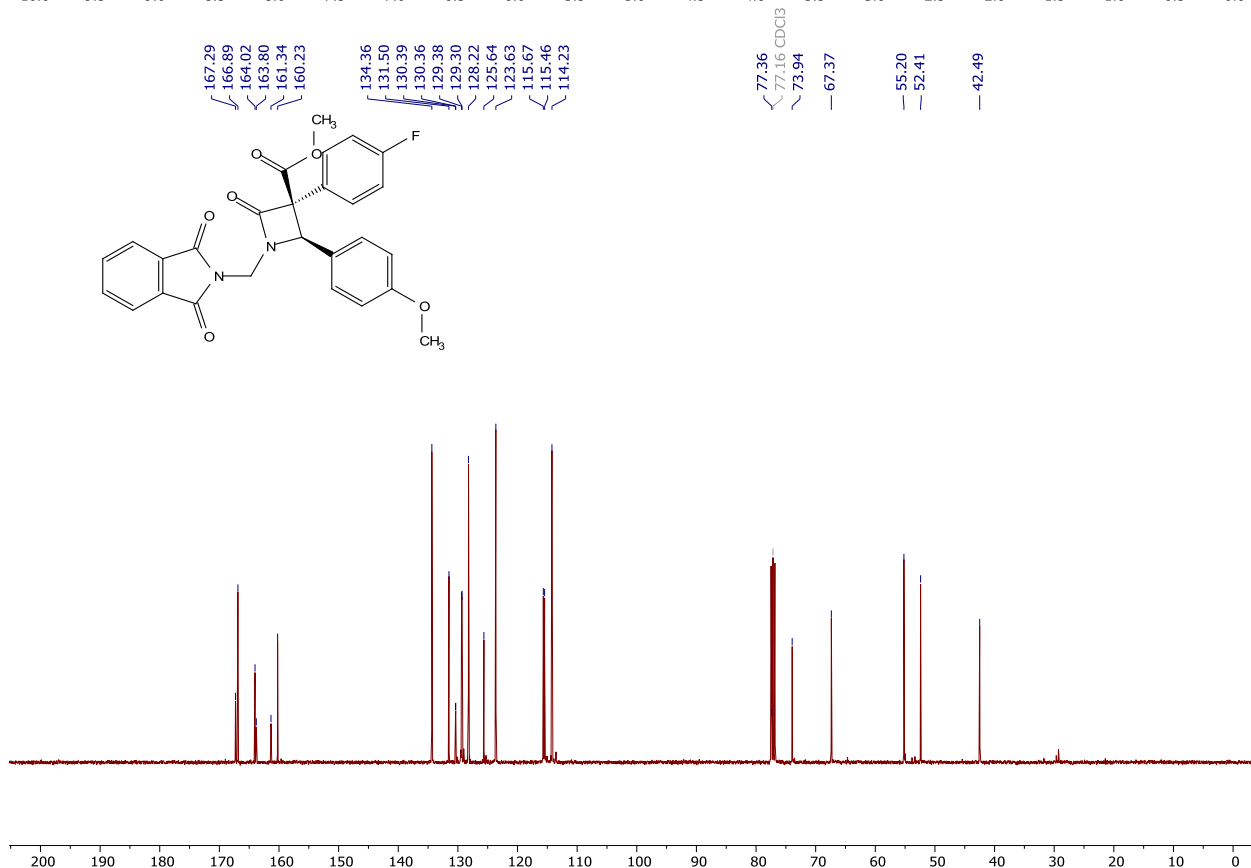

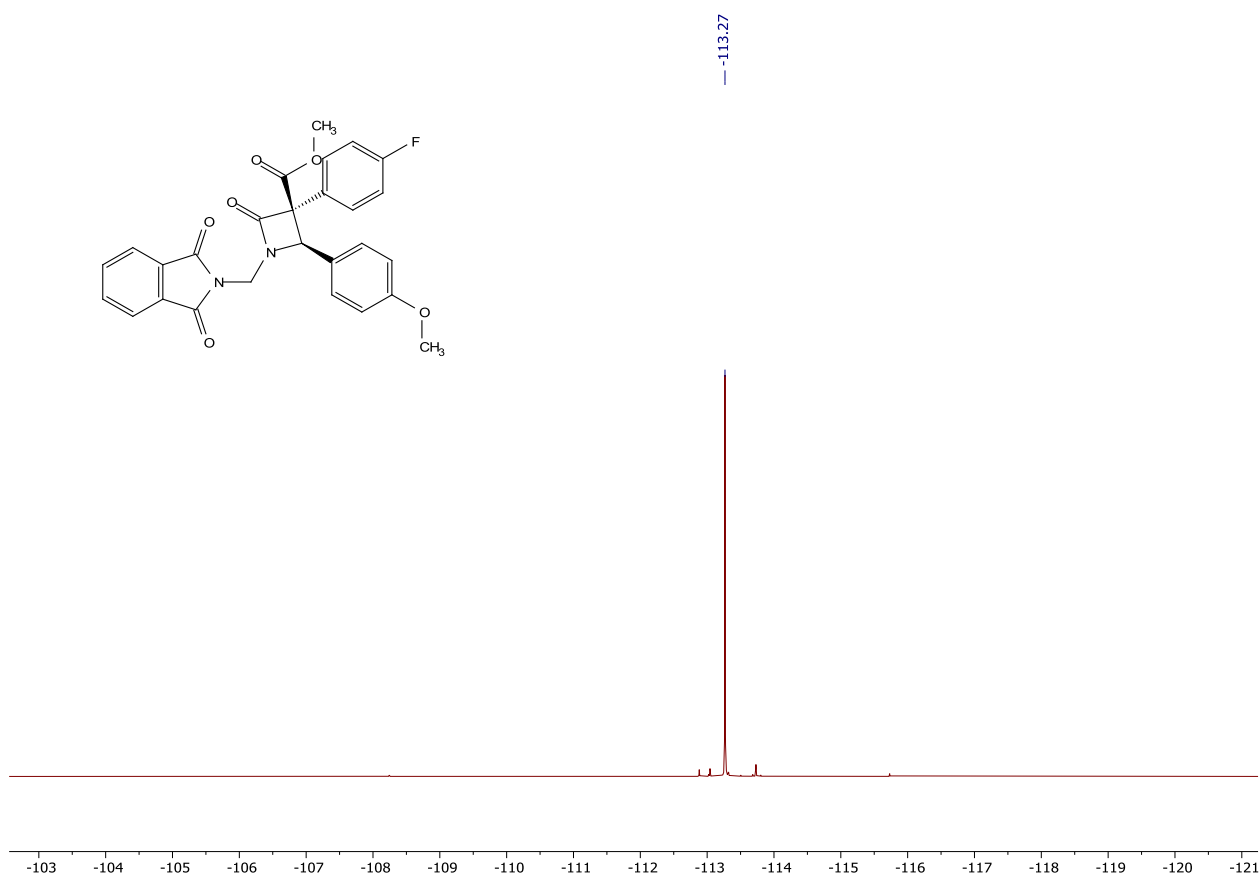

$^1\text{H}$ ,  $^{13}\text{C}$  and  $^{19}\text{F}$  NMR spectra of compound **4d**

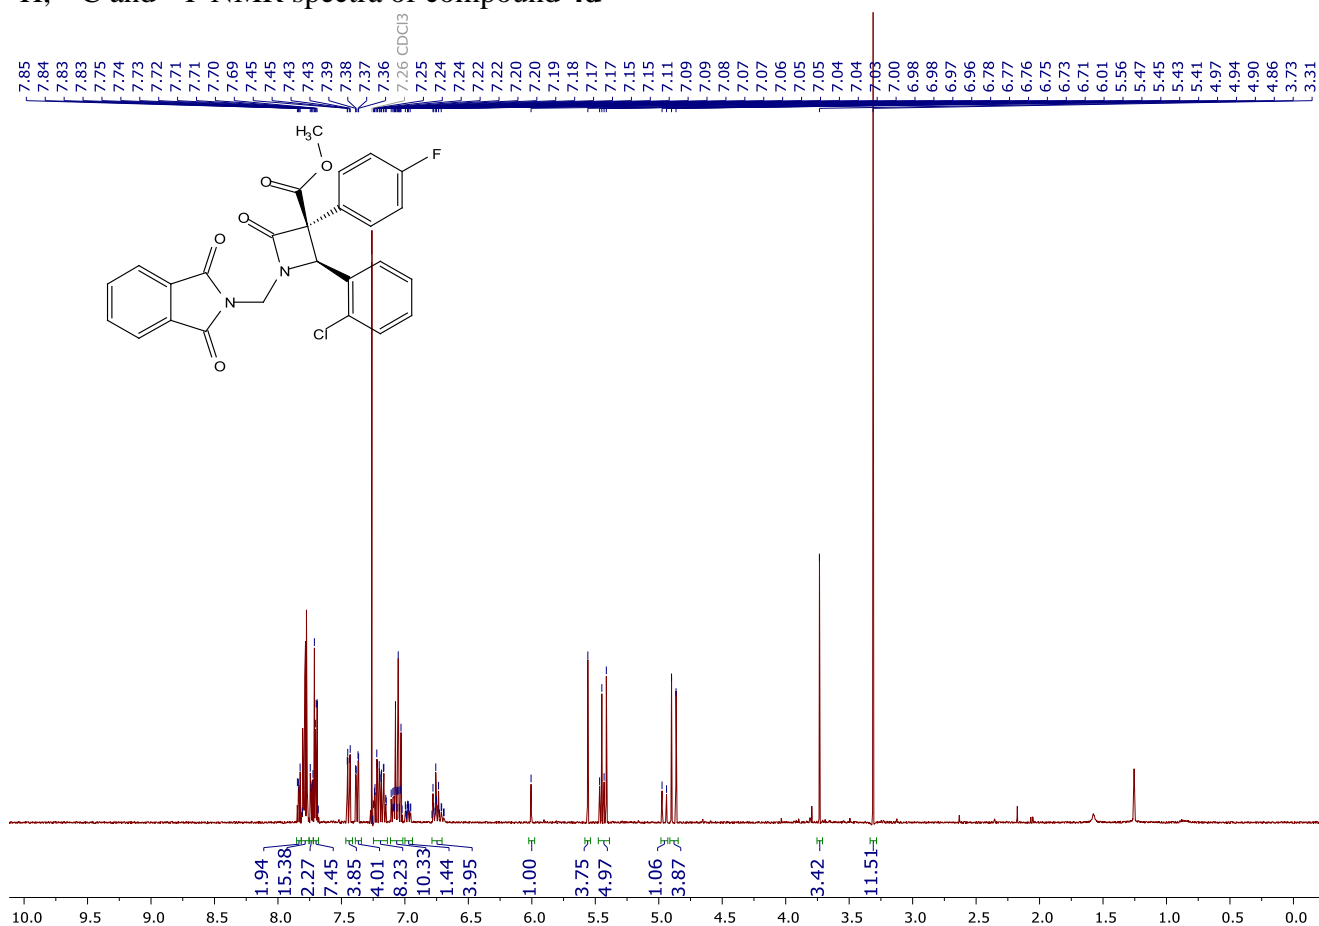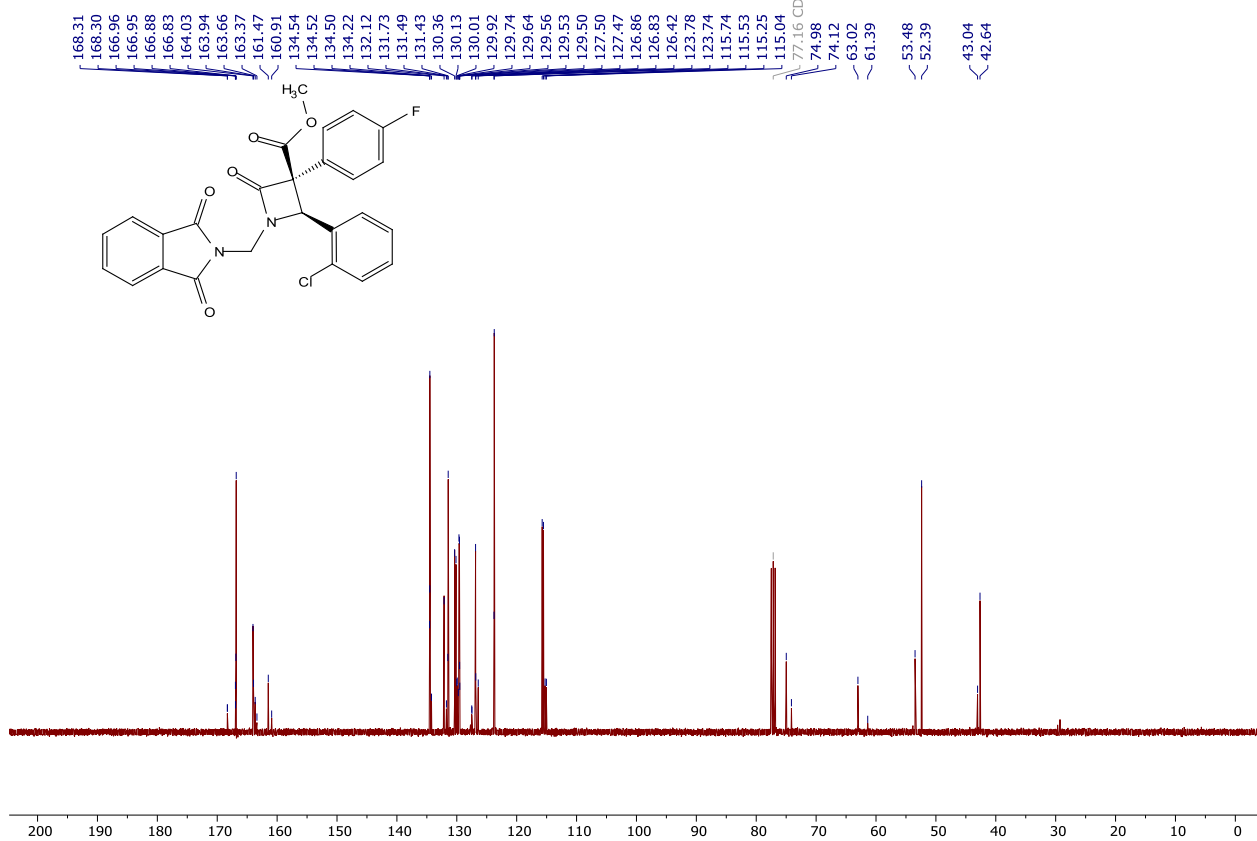

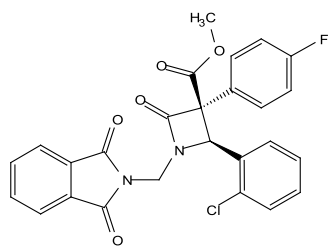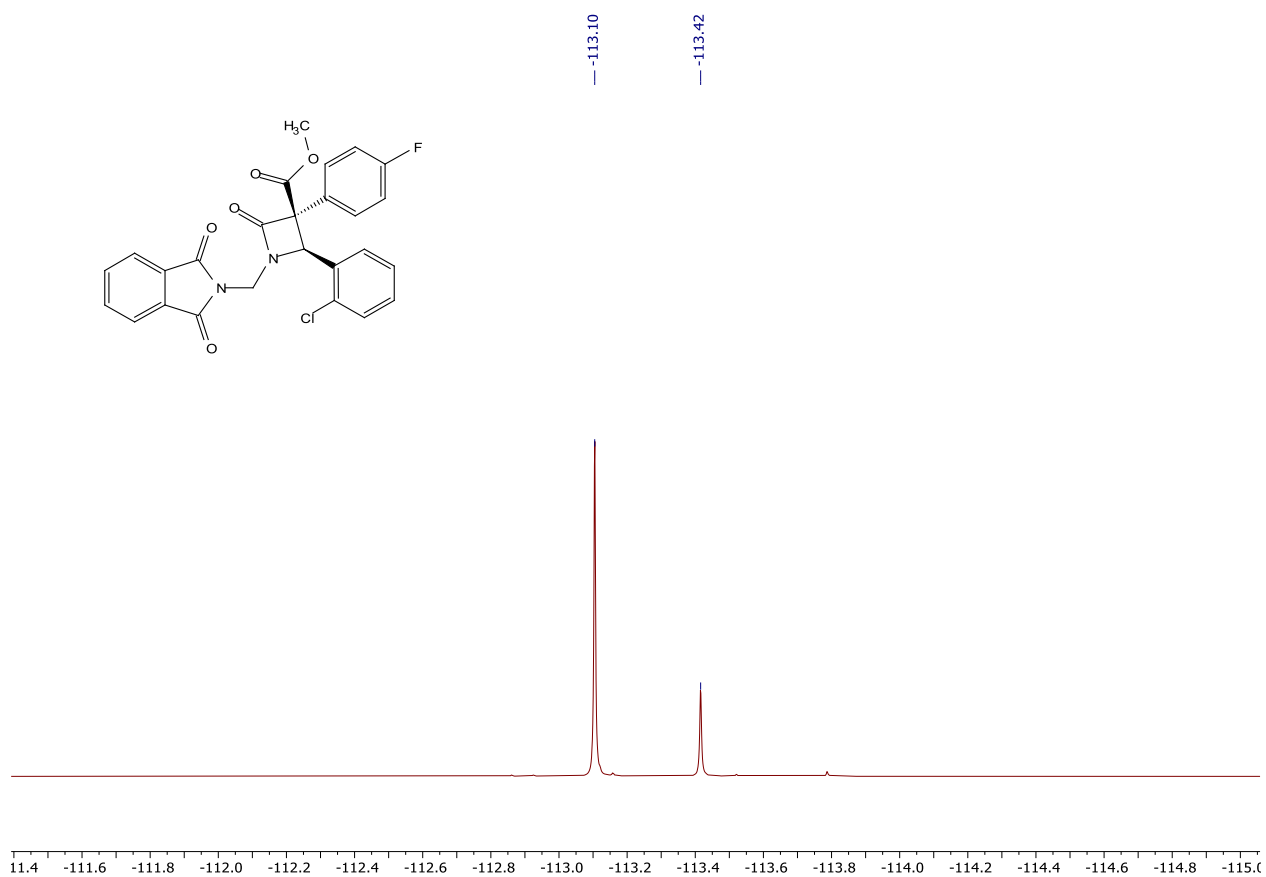

$^1\text{H}$  and  $^{13}\text{C}$  NMR spectra of compound **4e**

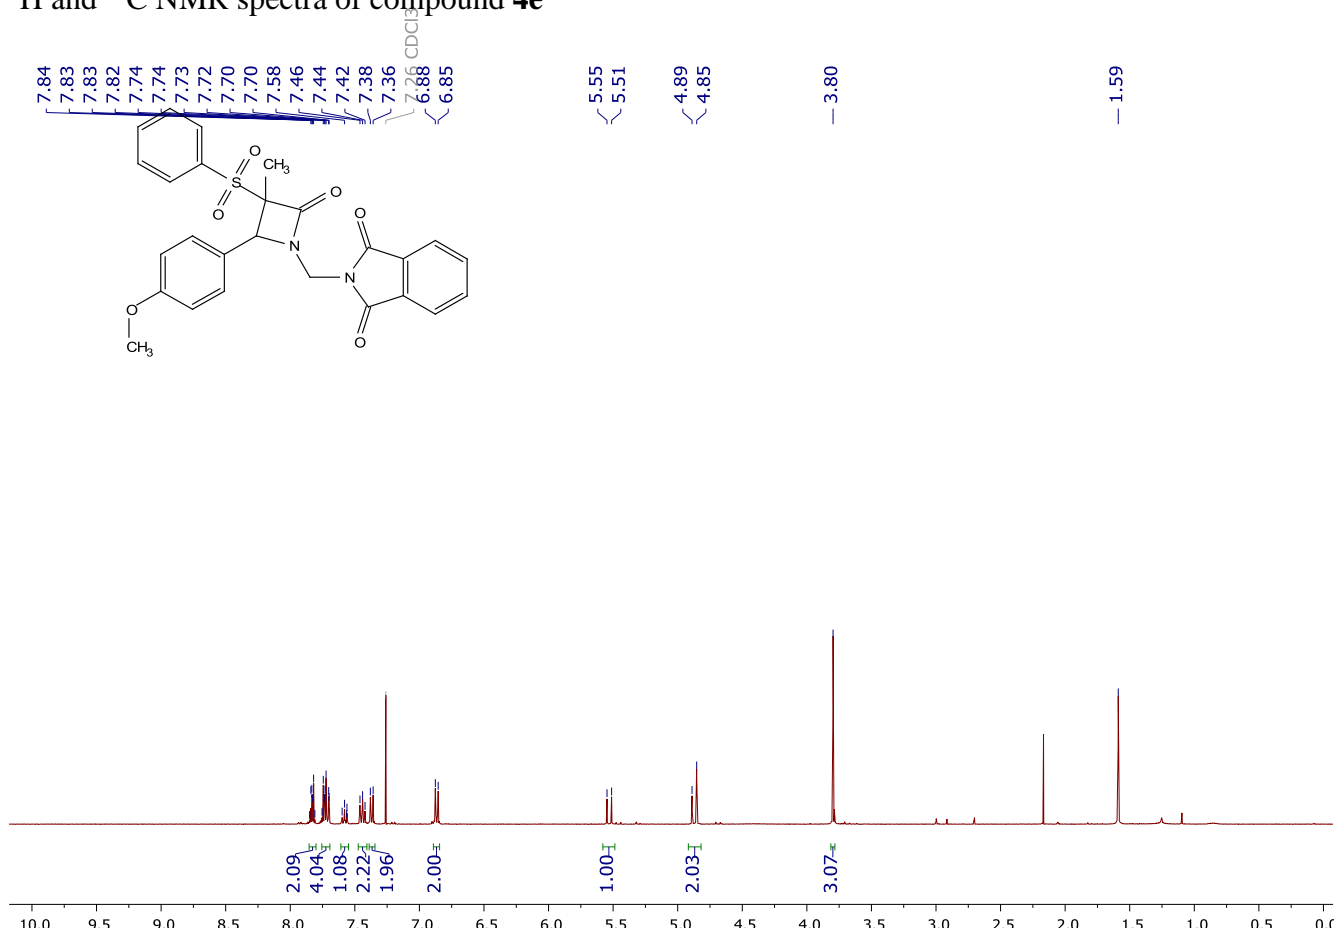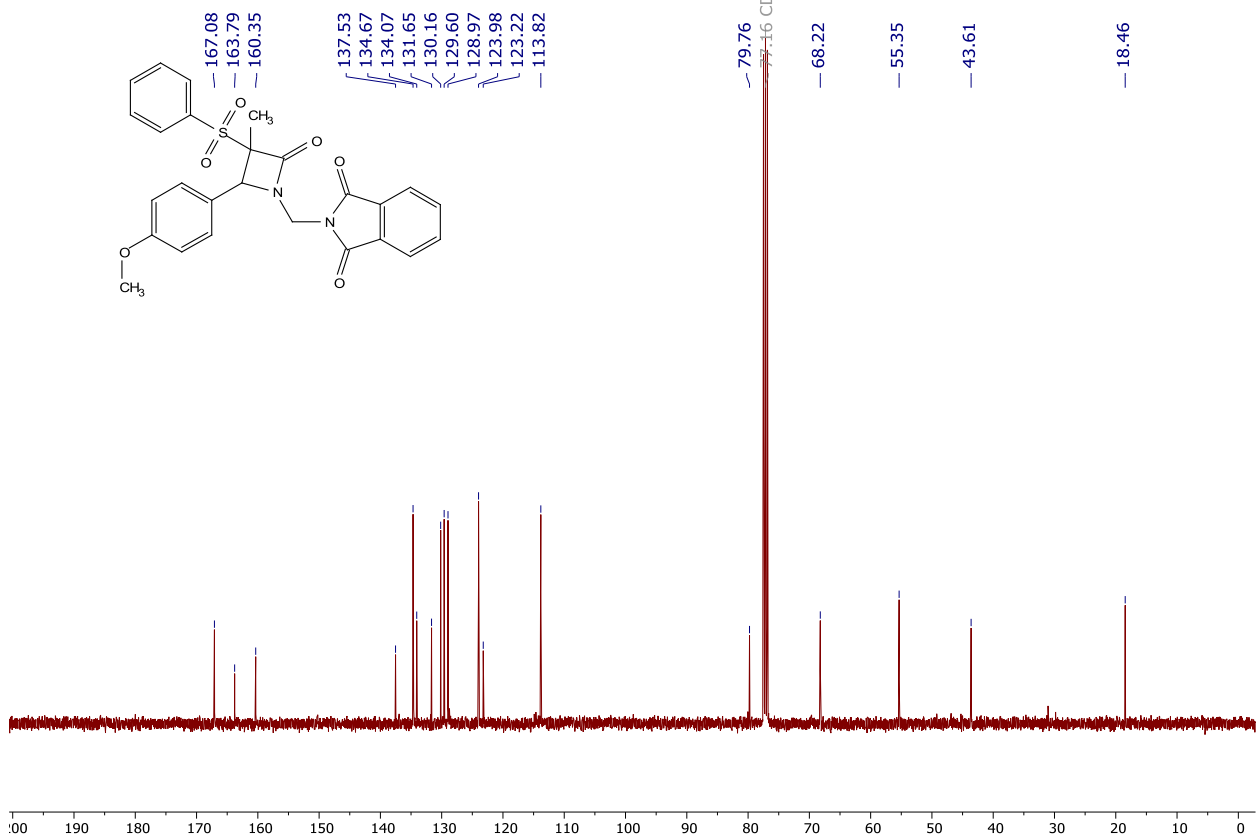

# $^1\text{H}$ and $^{13}\text{C}$ NMR spectra of compound **4f**

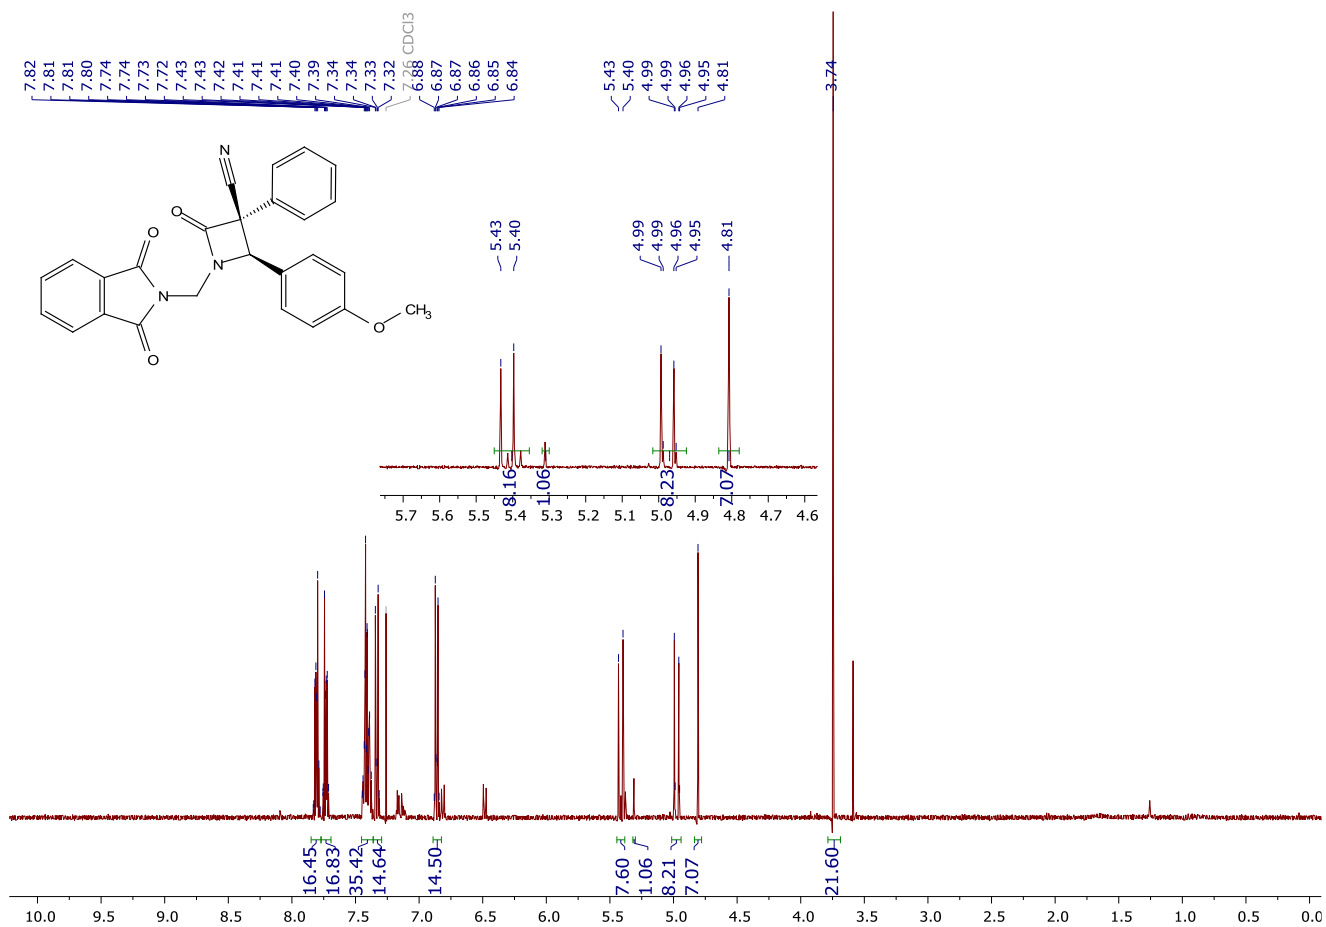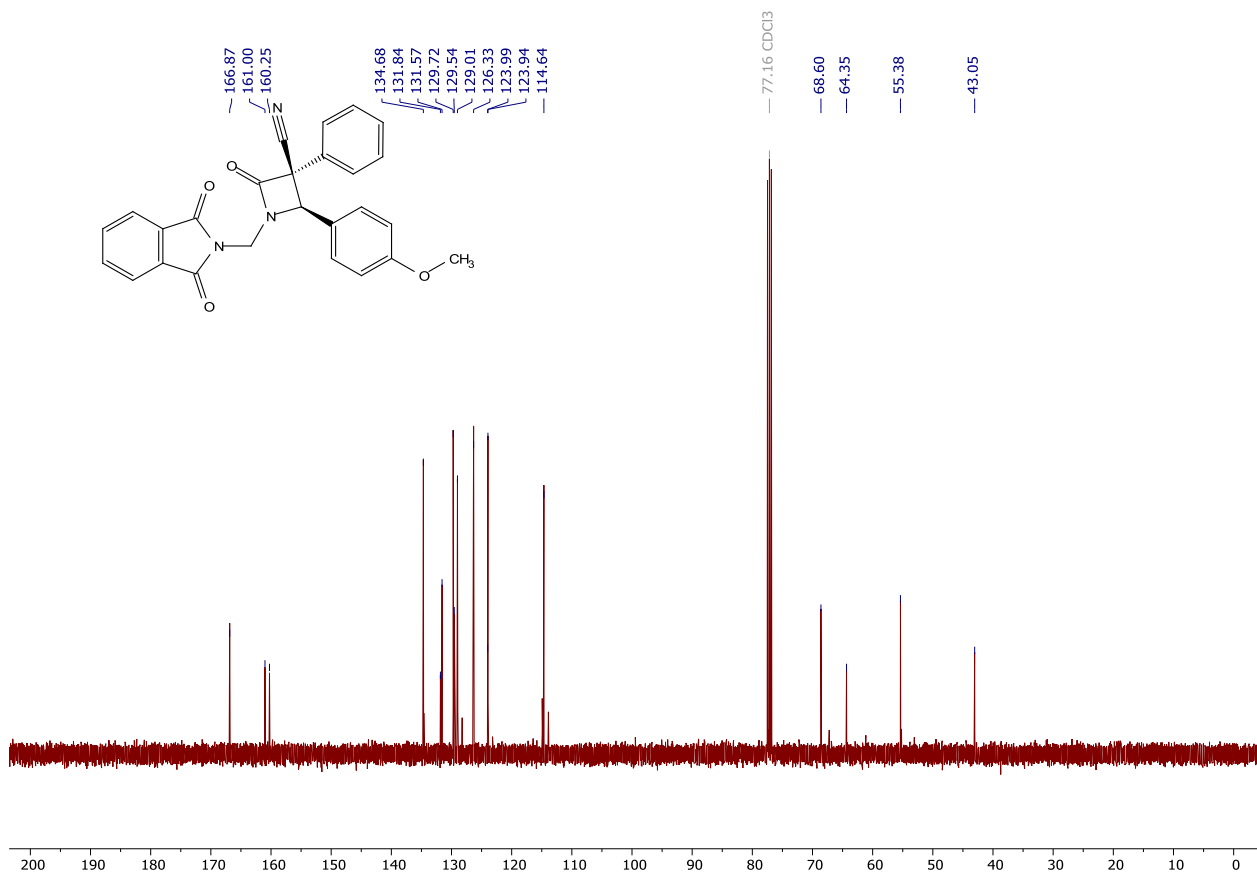

$^1\text{H}$ ,  $^{13}\text{C}$  and  $^{19}\text{F}$  NMR spectra of compound **4g**

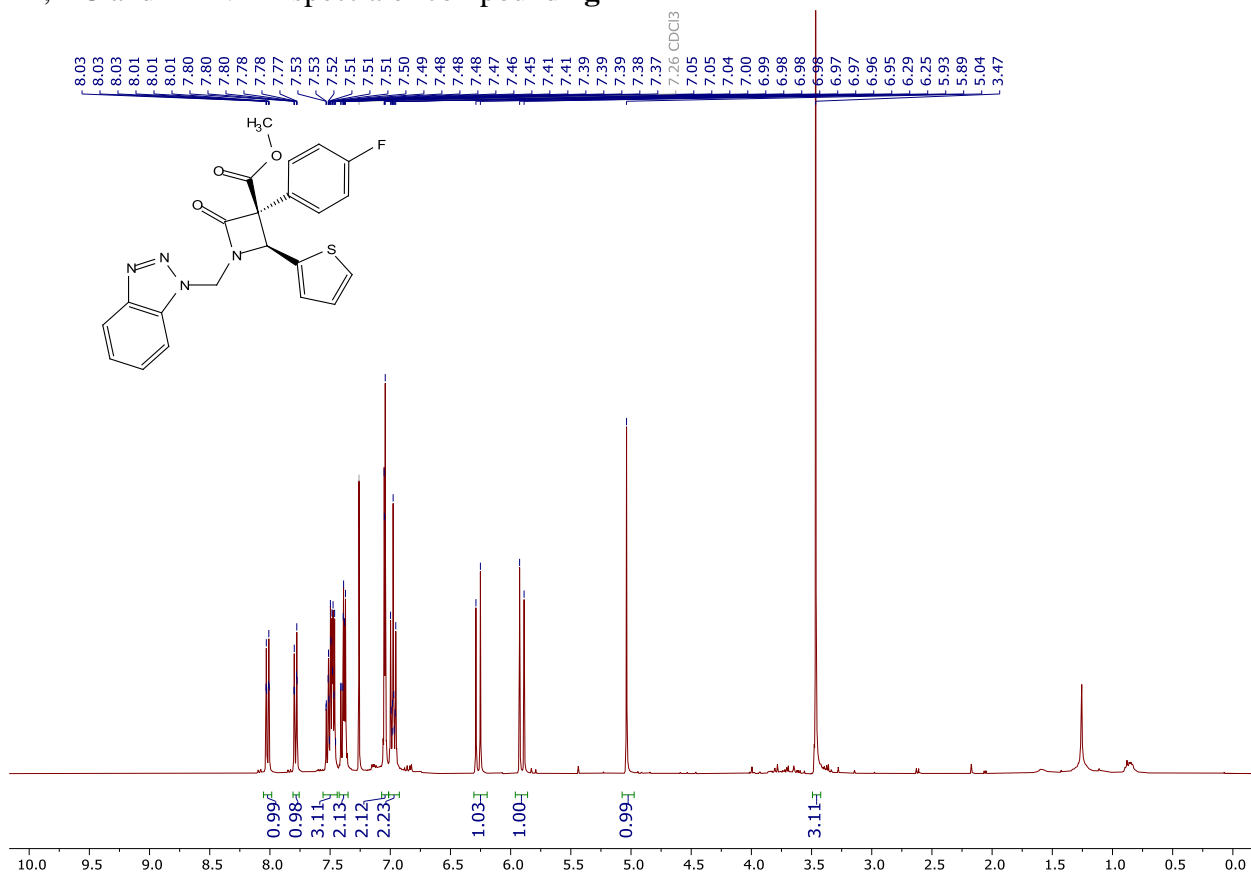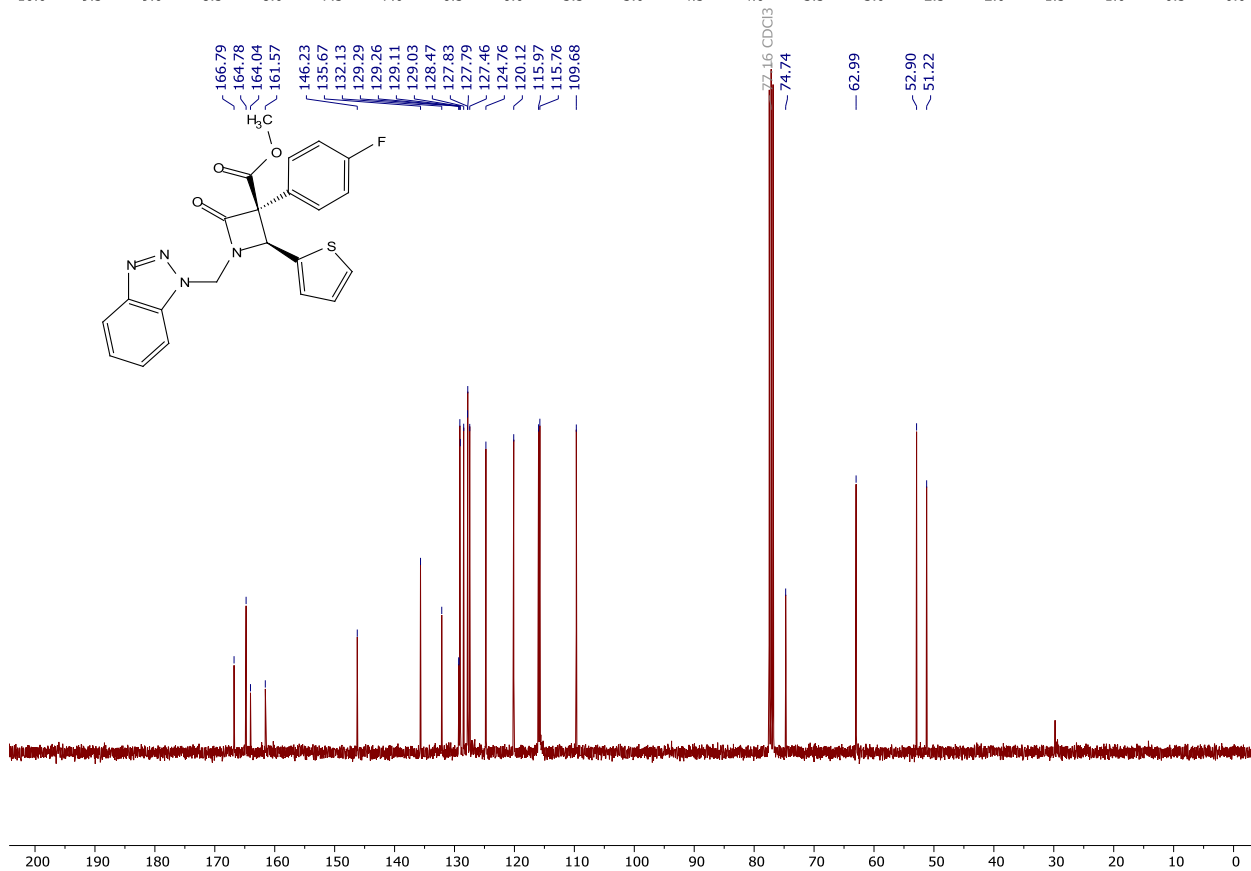



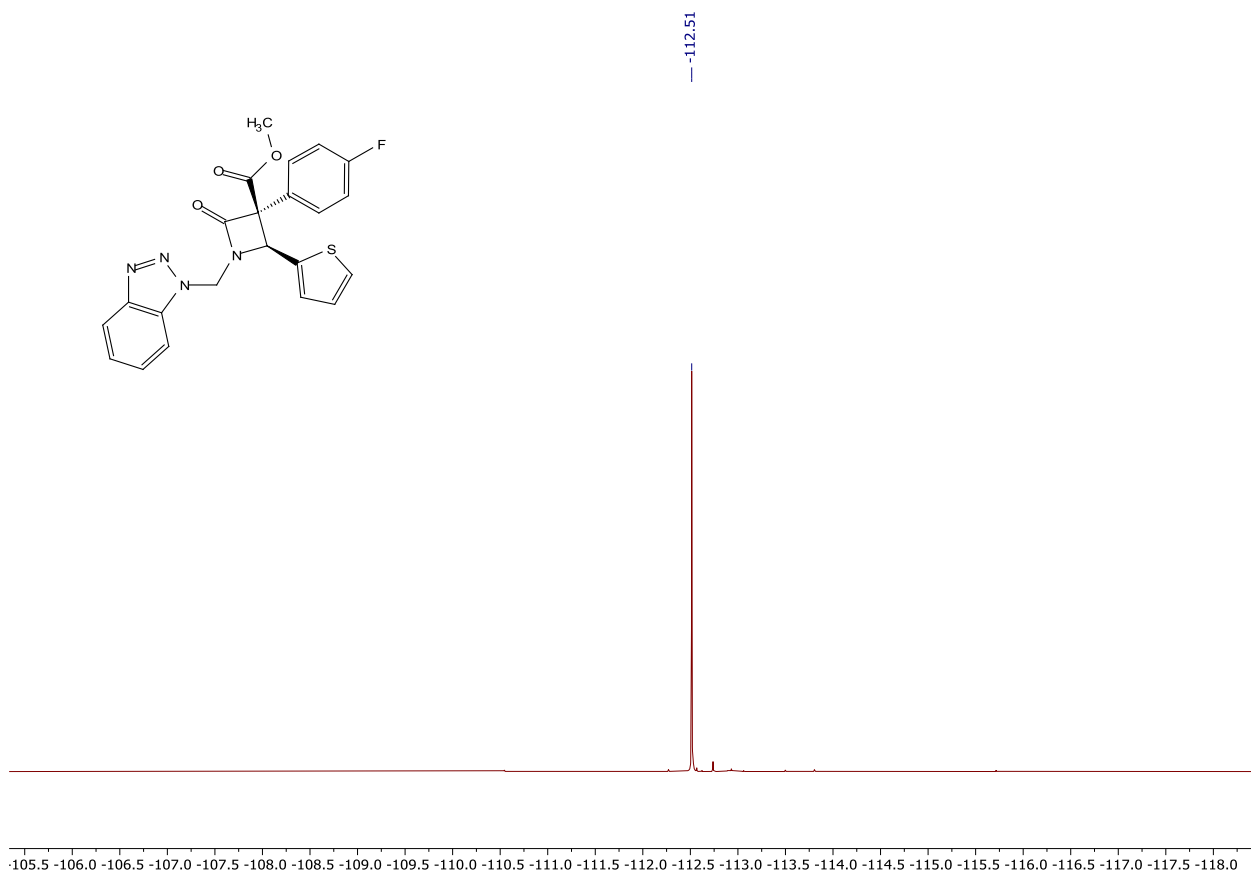

$^1\text{H}$ ,  $^{13}\text{C}$  and  $^{19}\text{F}$  NMR spectra of compound **4g**

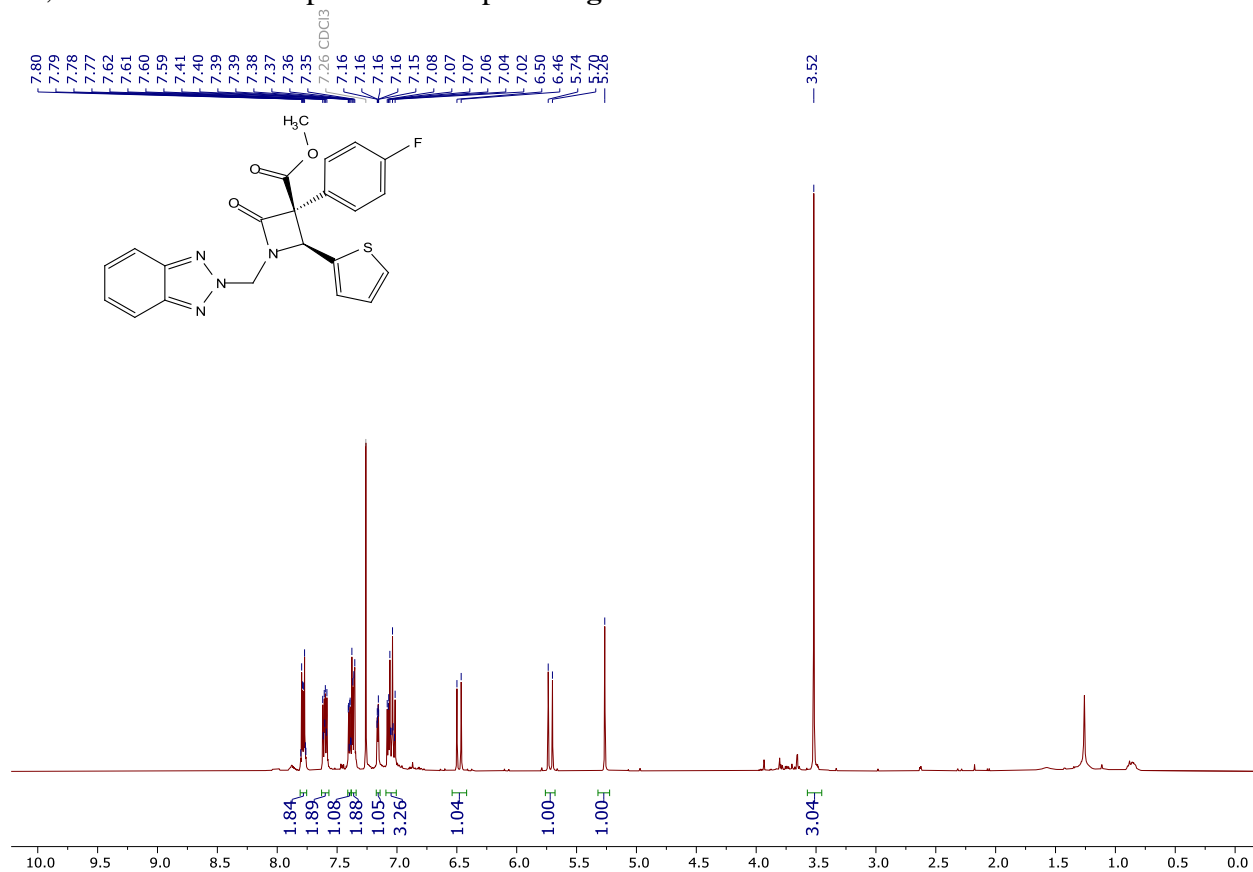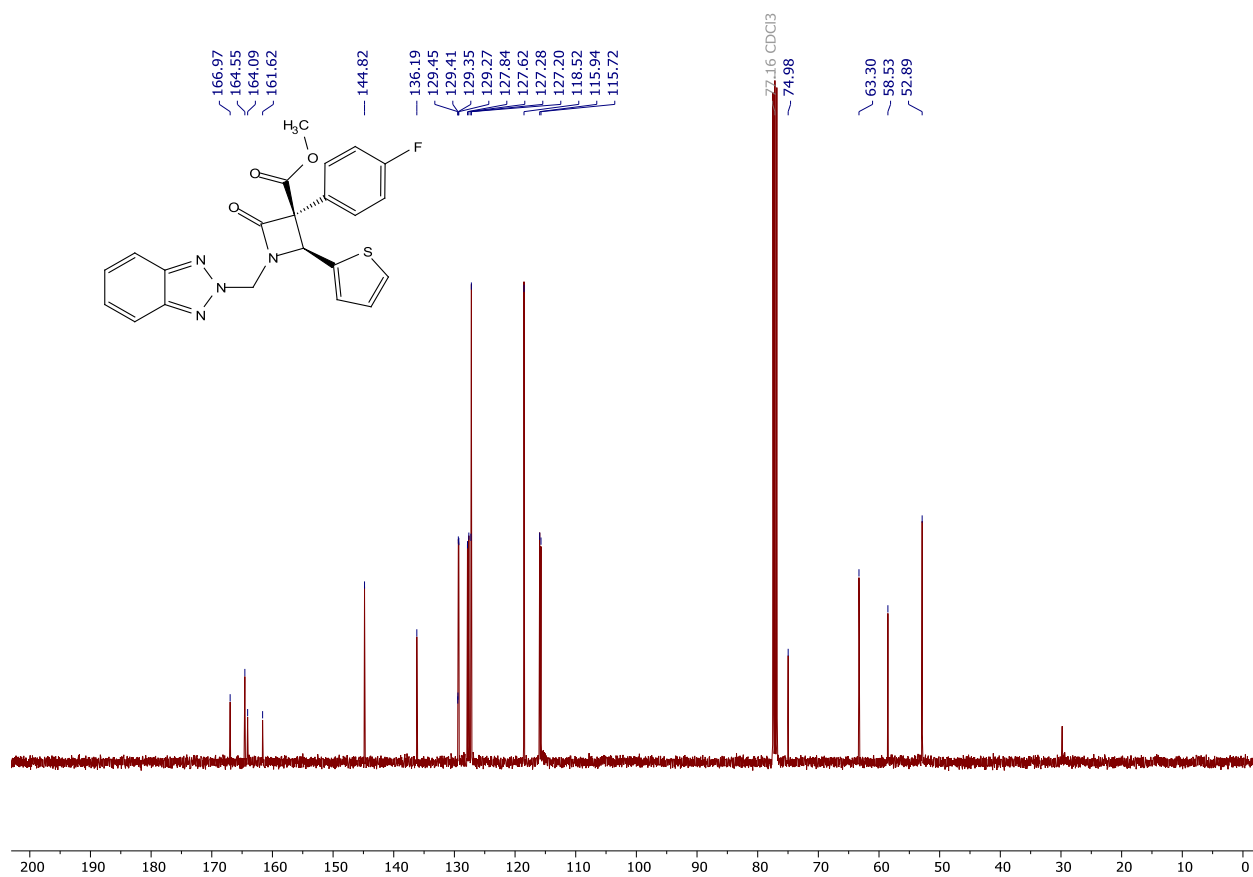

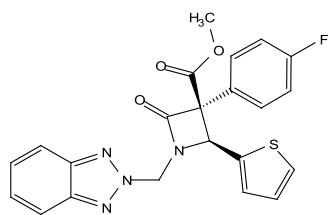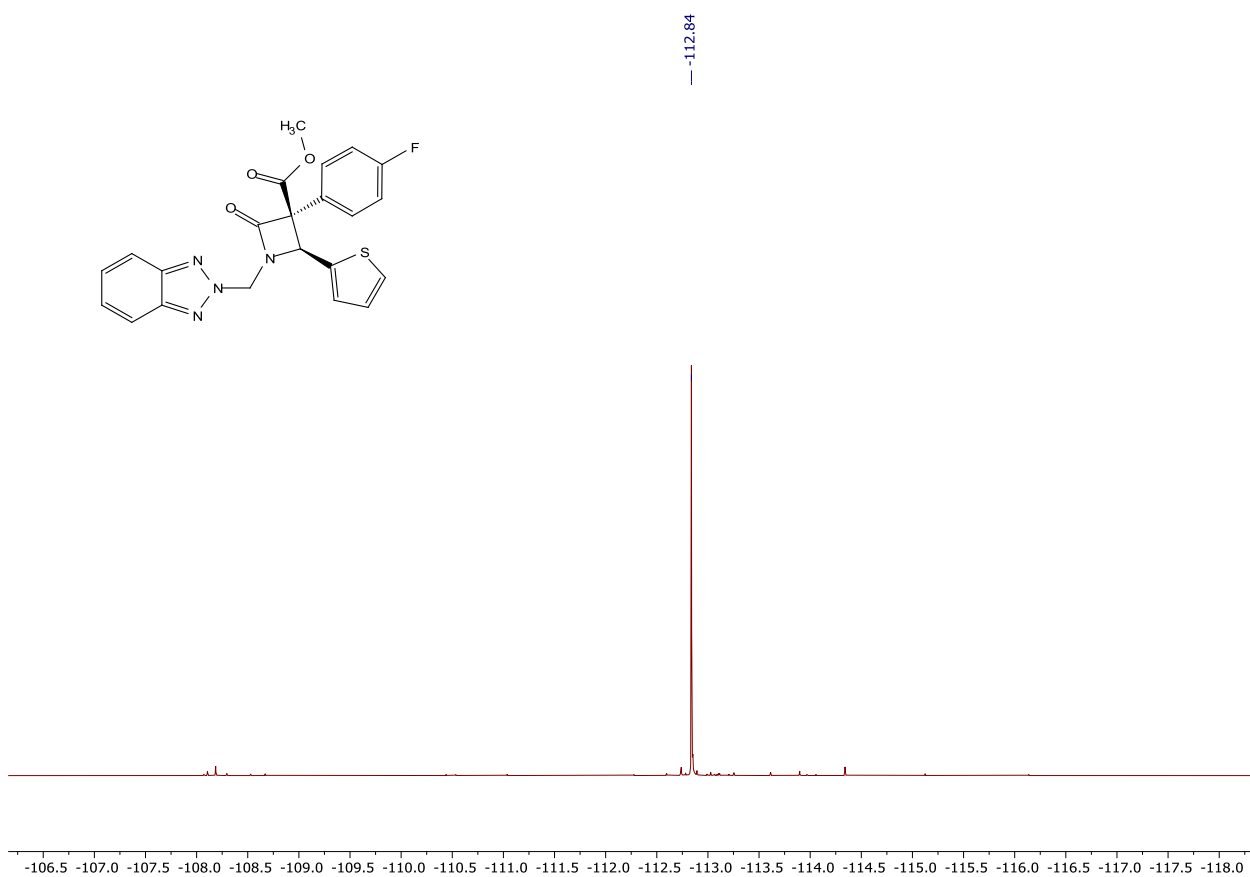

$^1\text{H}$ ,  $^{13}\text{C}$  and  $^{19}\text{F}$  NMR spectra of compound **4h**

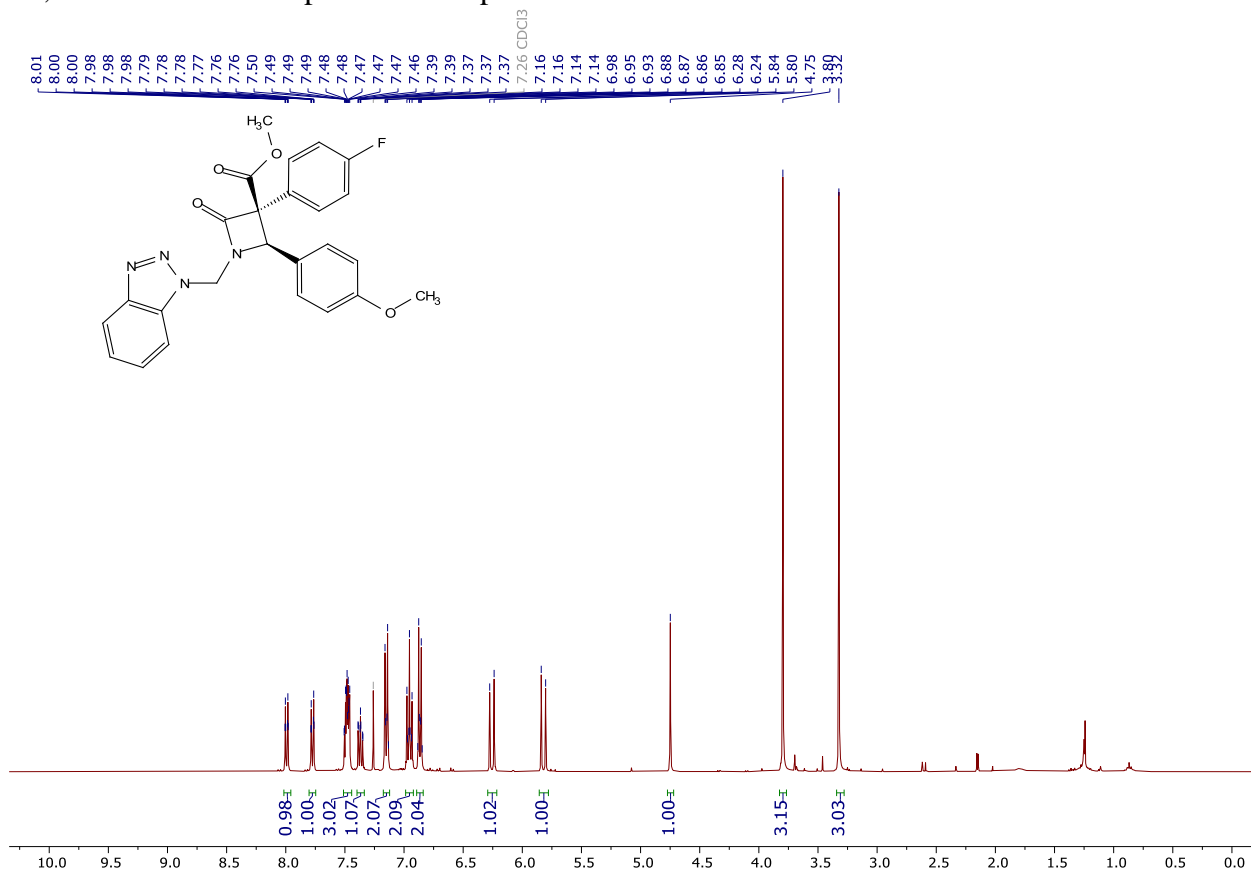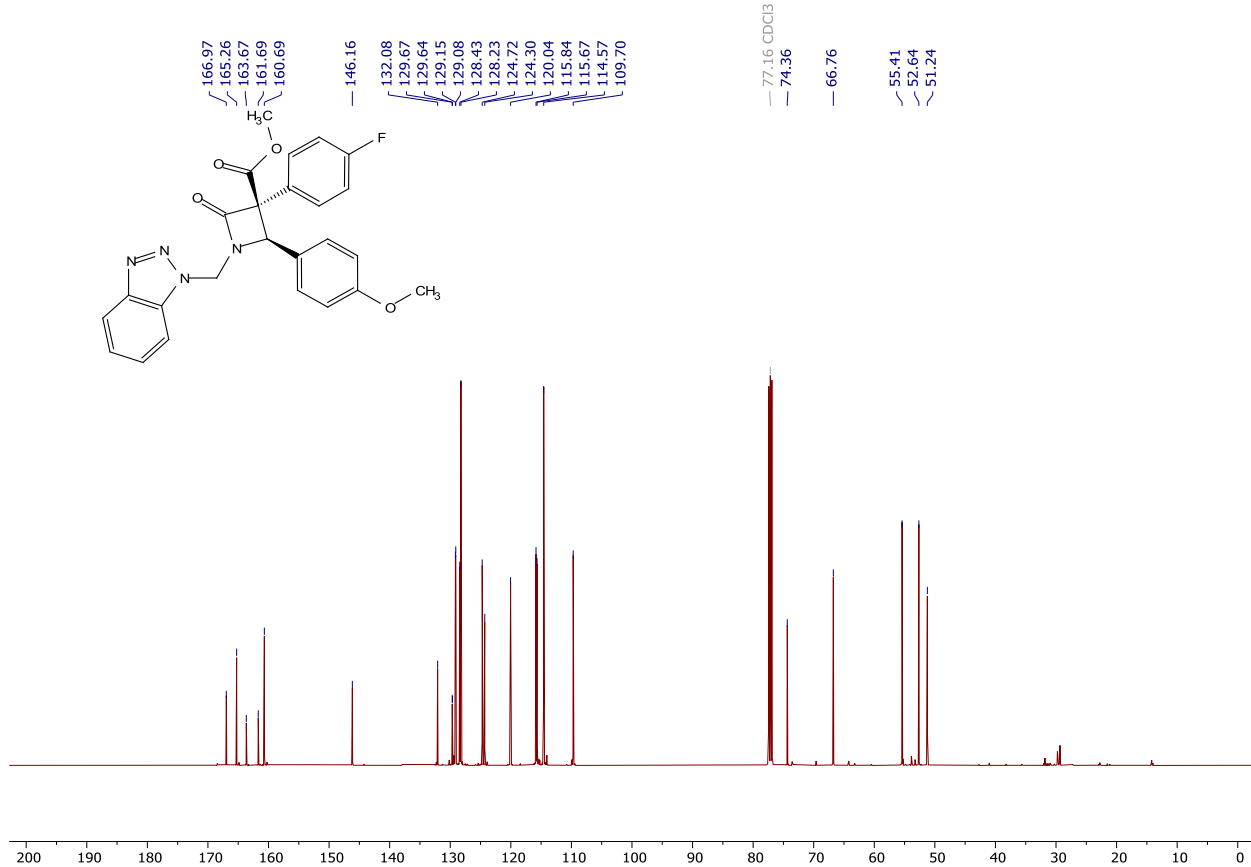

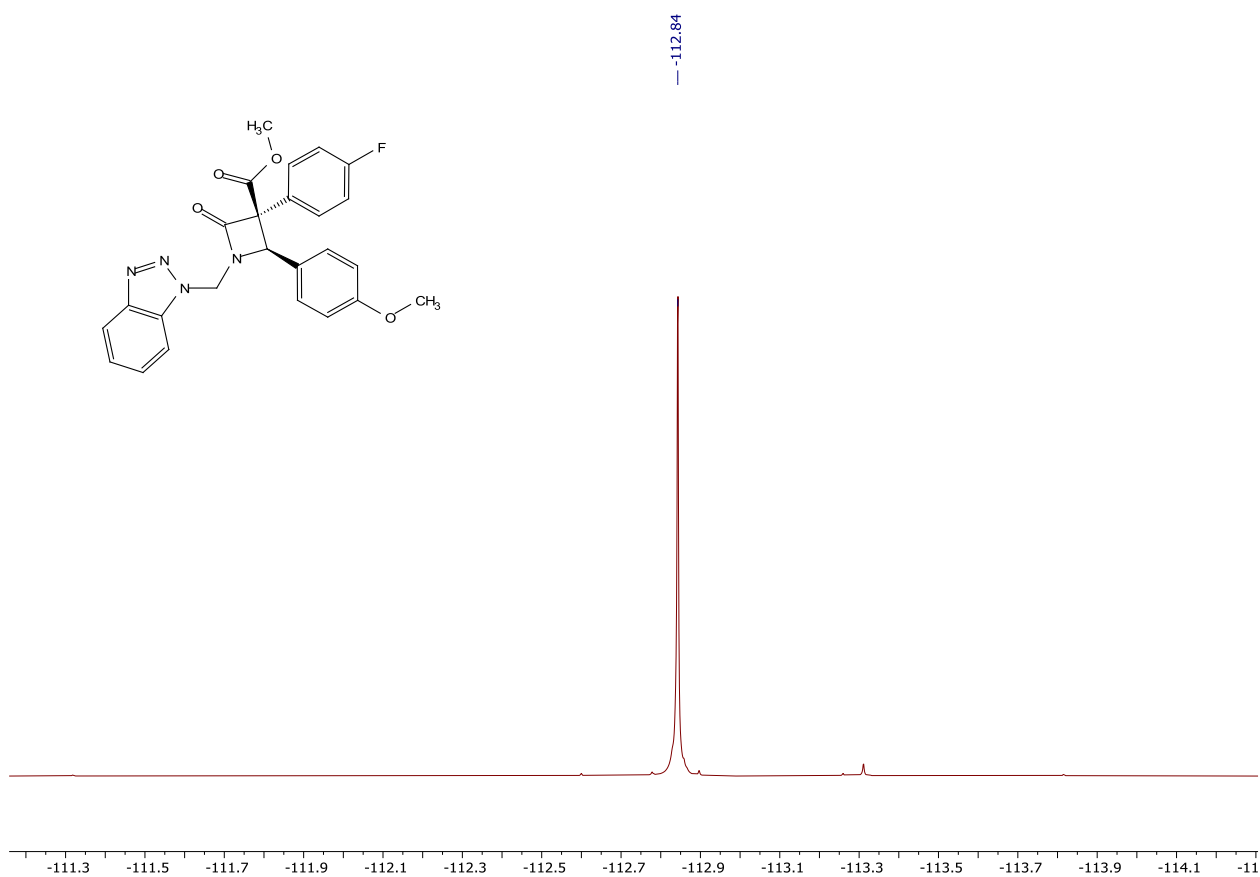

$^1\text{H}$ ,  $^{13}\text{C}$  and  $^{19}\text{F}$  NMR spectra of compound **4h**

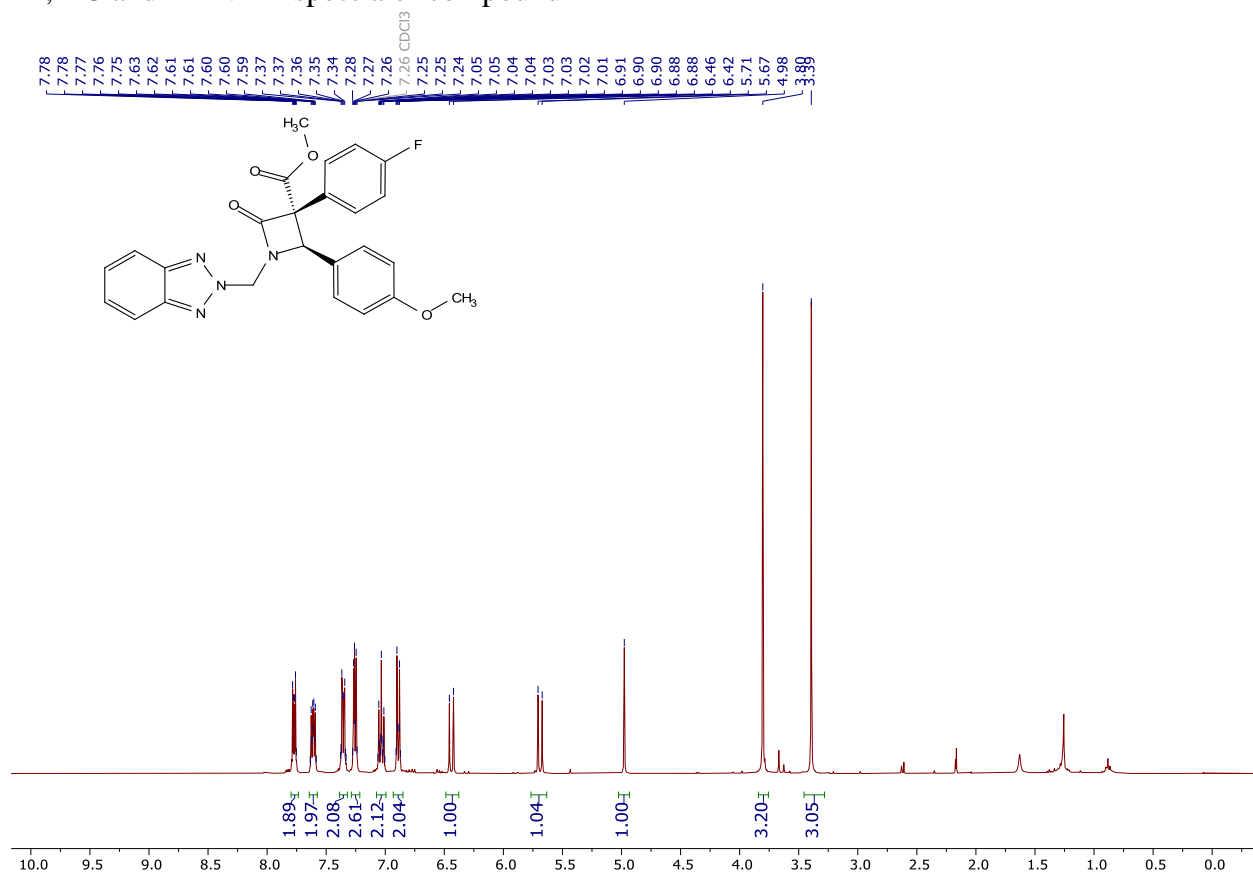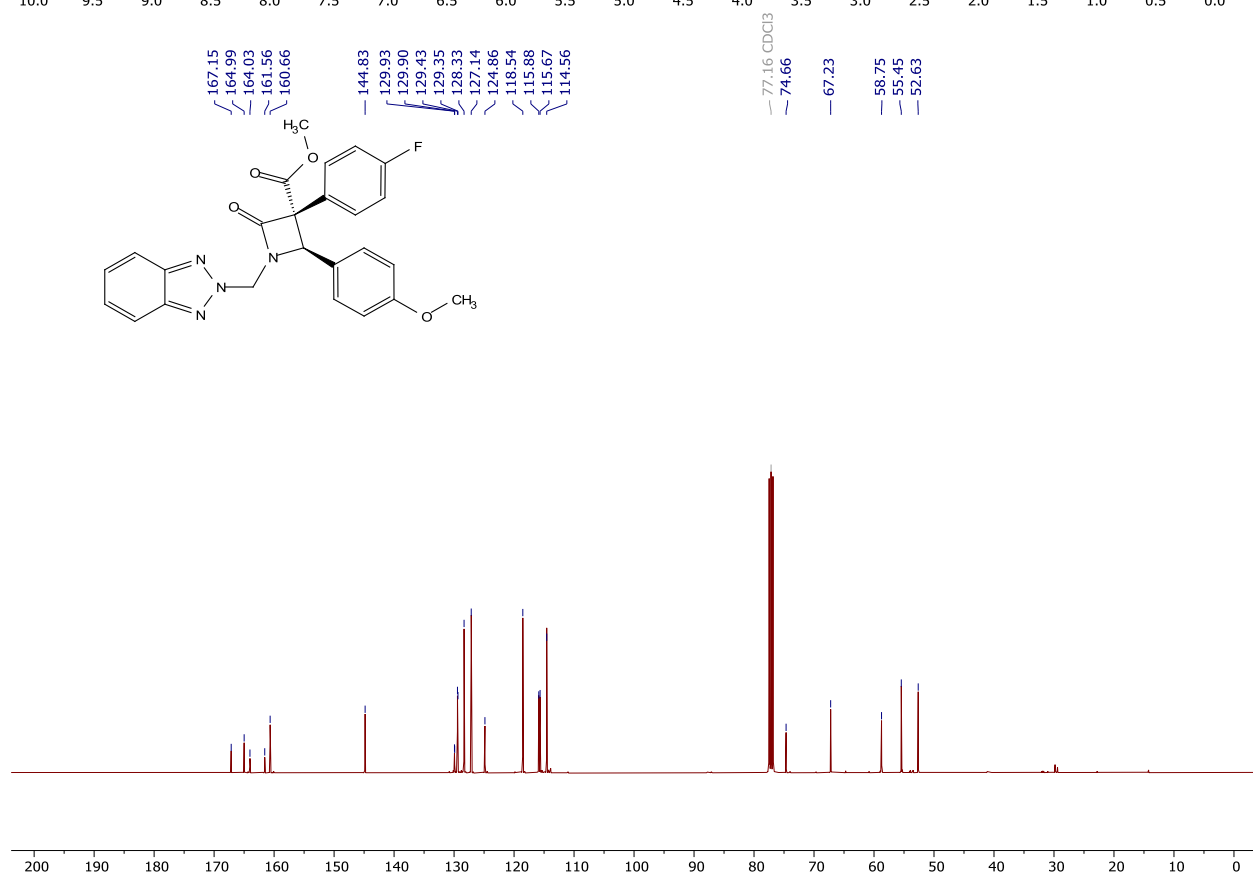

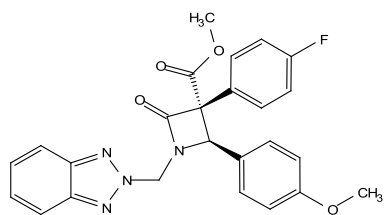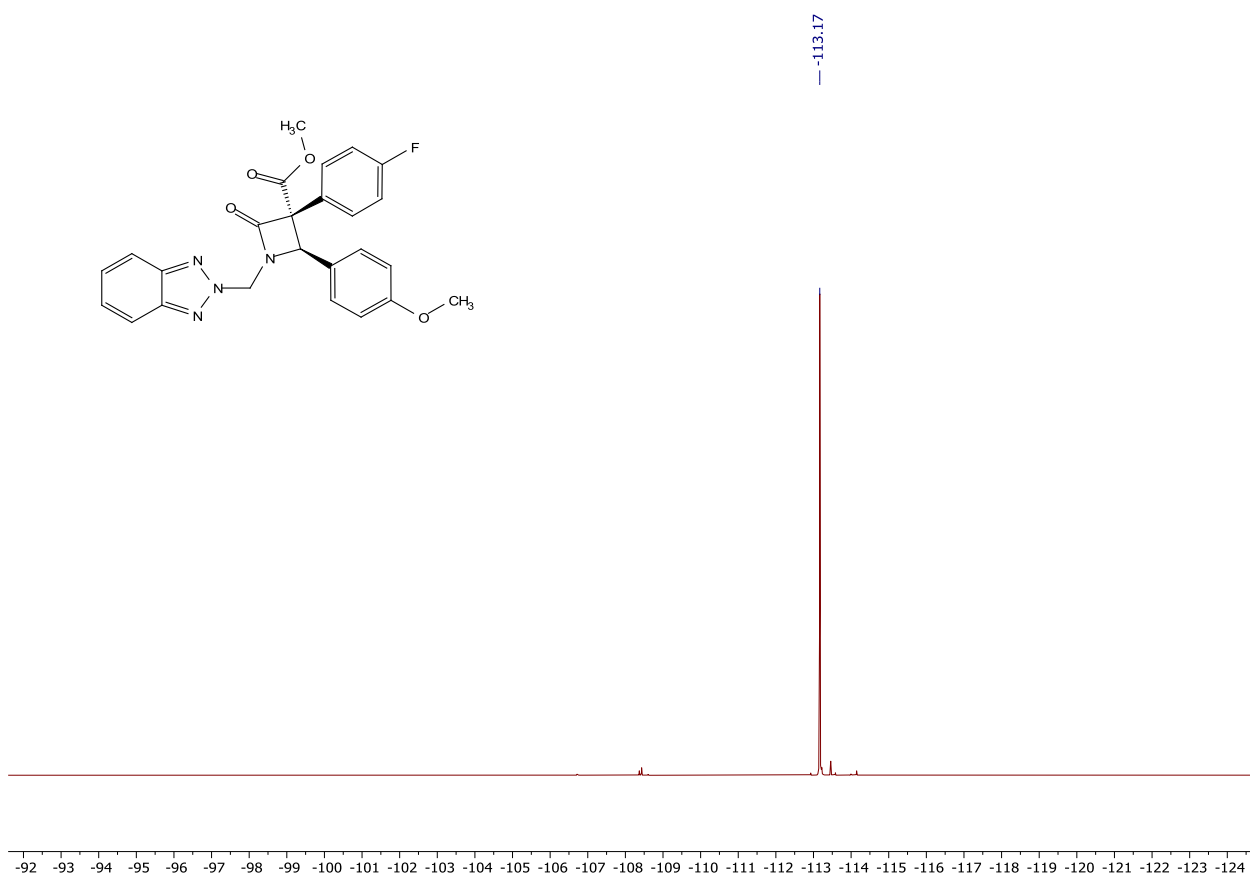

$^1\text{H}$ ,  $^{13}\text{C}$  and  $^{19}\text{F}$  NMR spectra of compound **4i**

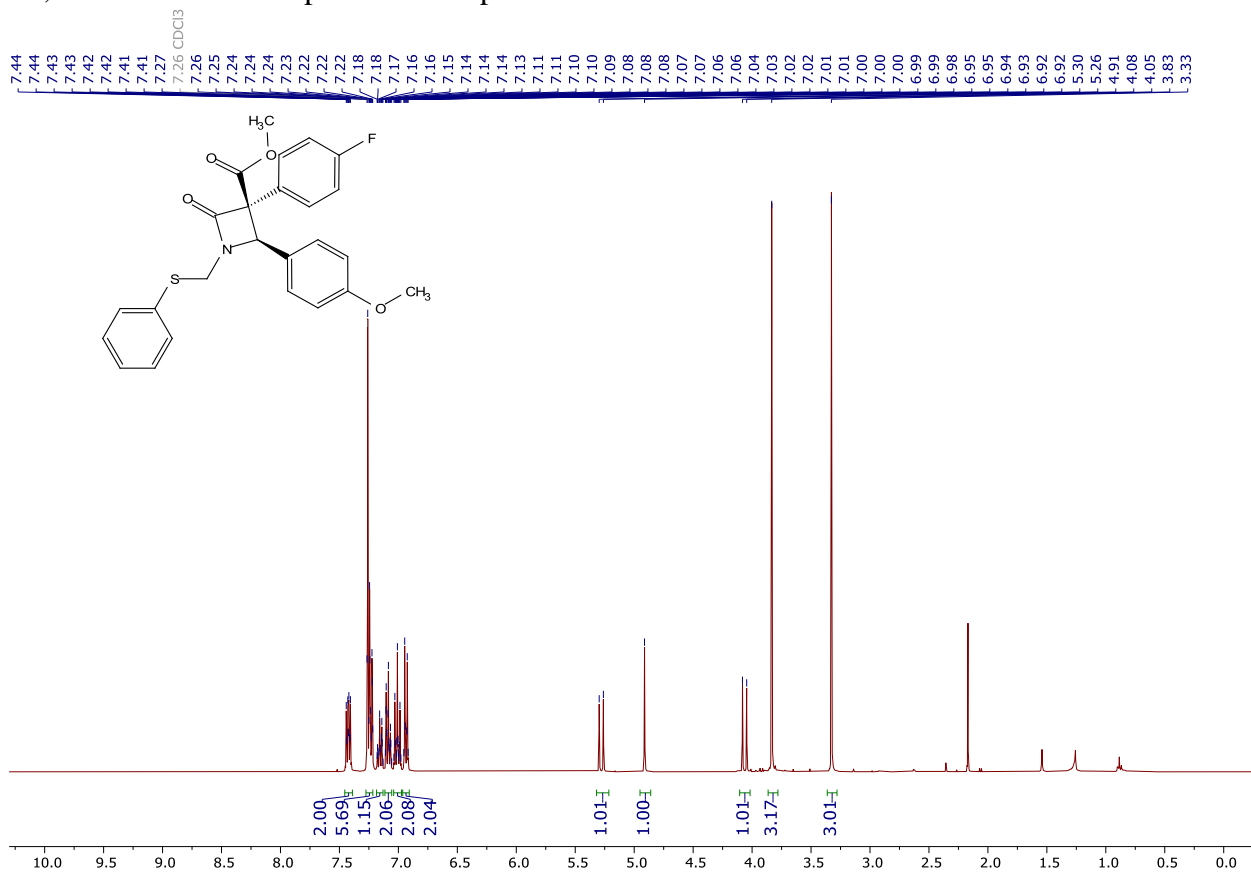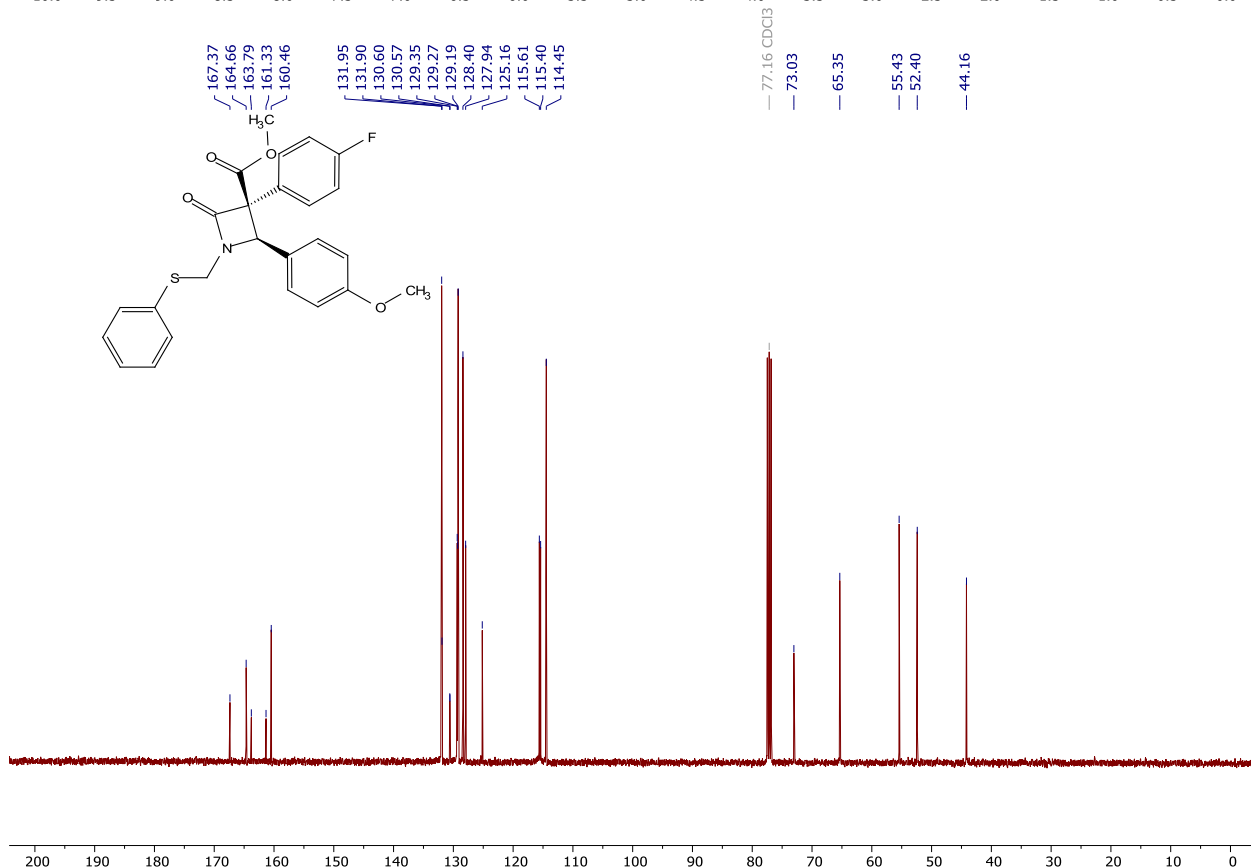



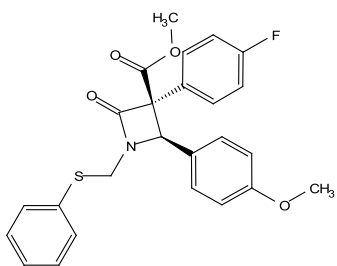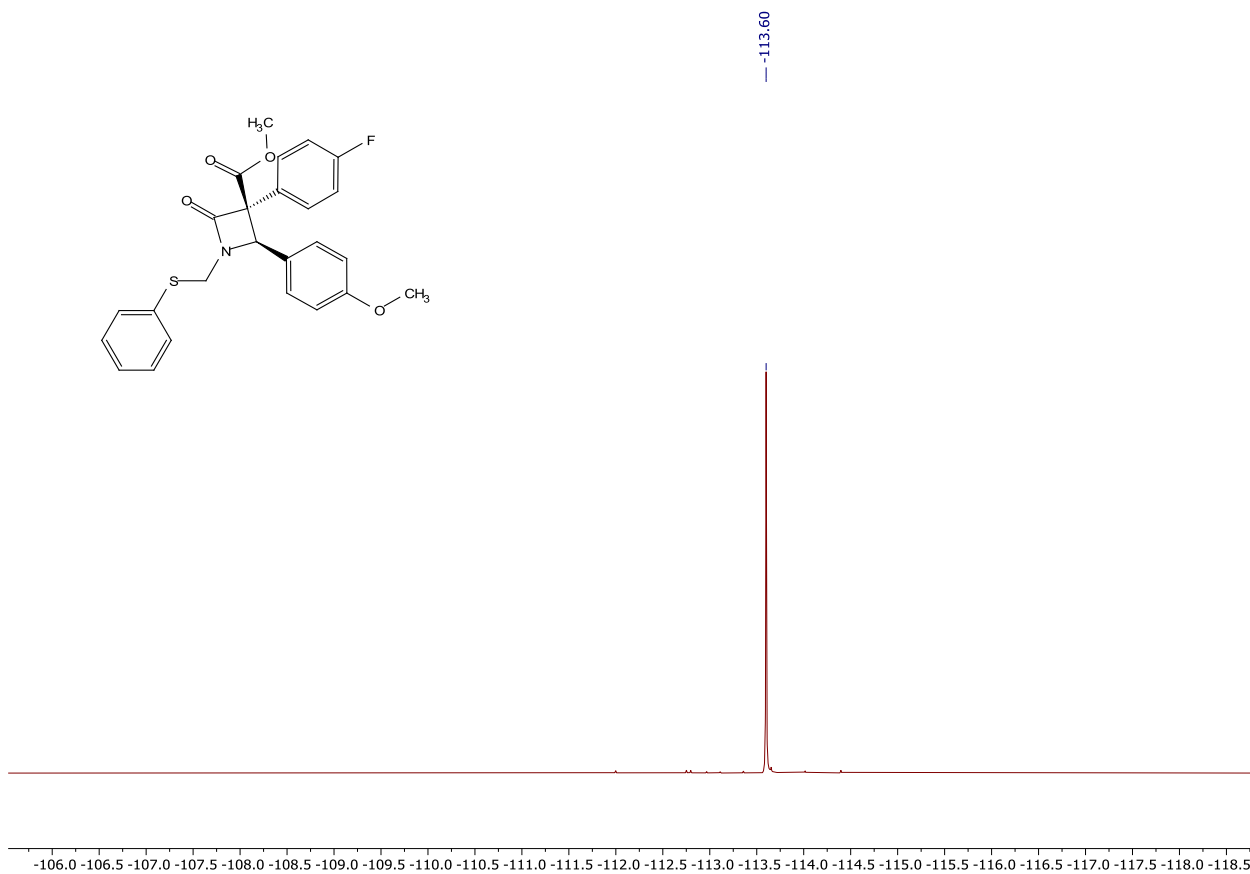

$^1\text{H}$ ,  $^{13}\text{C}$  and  $^{19}\text{F}$  NMR spectra of compound **4j**

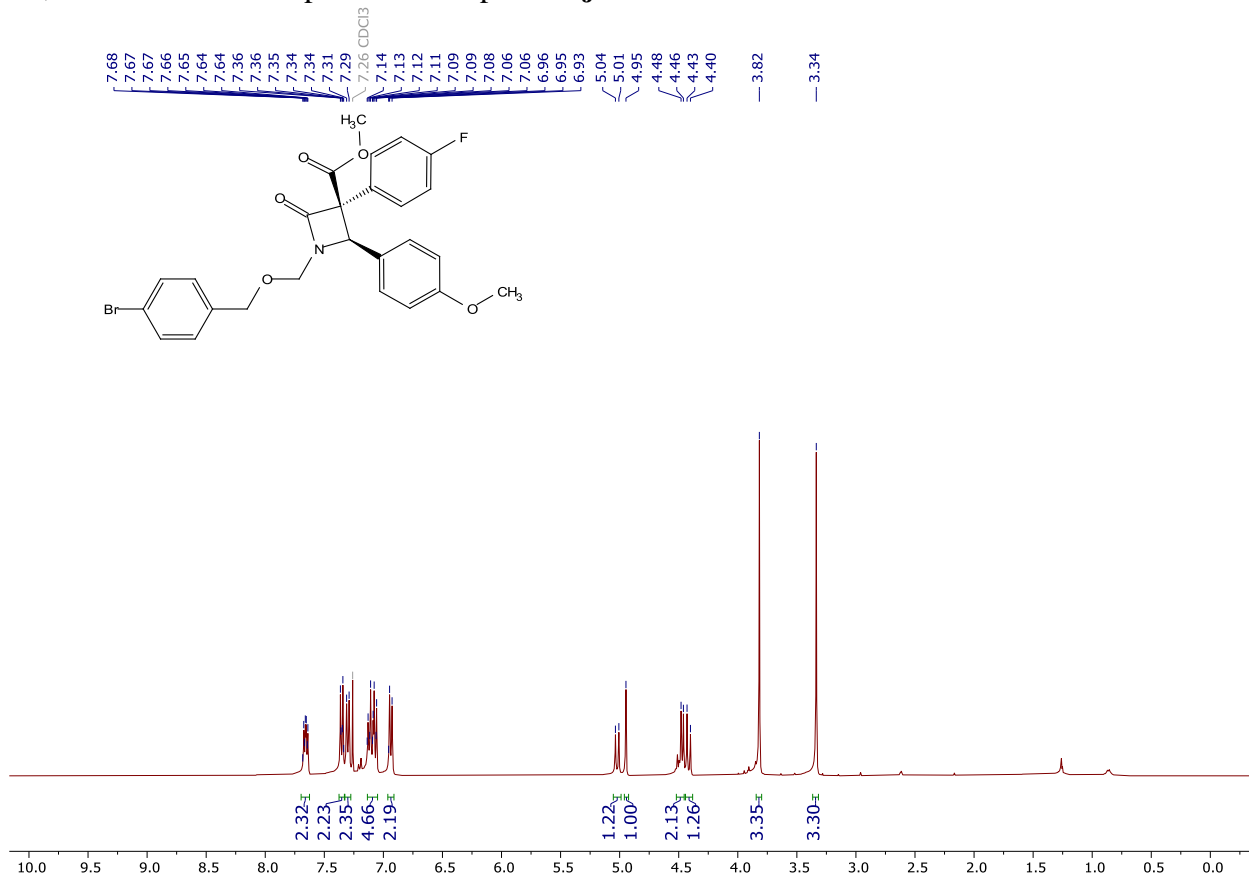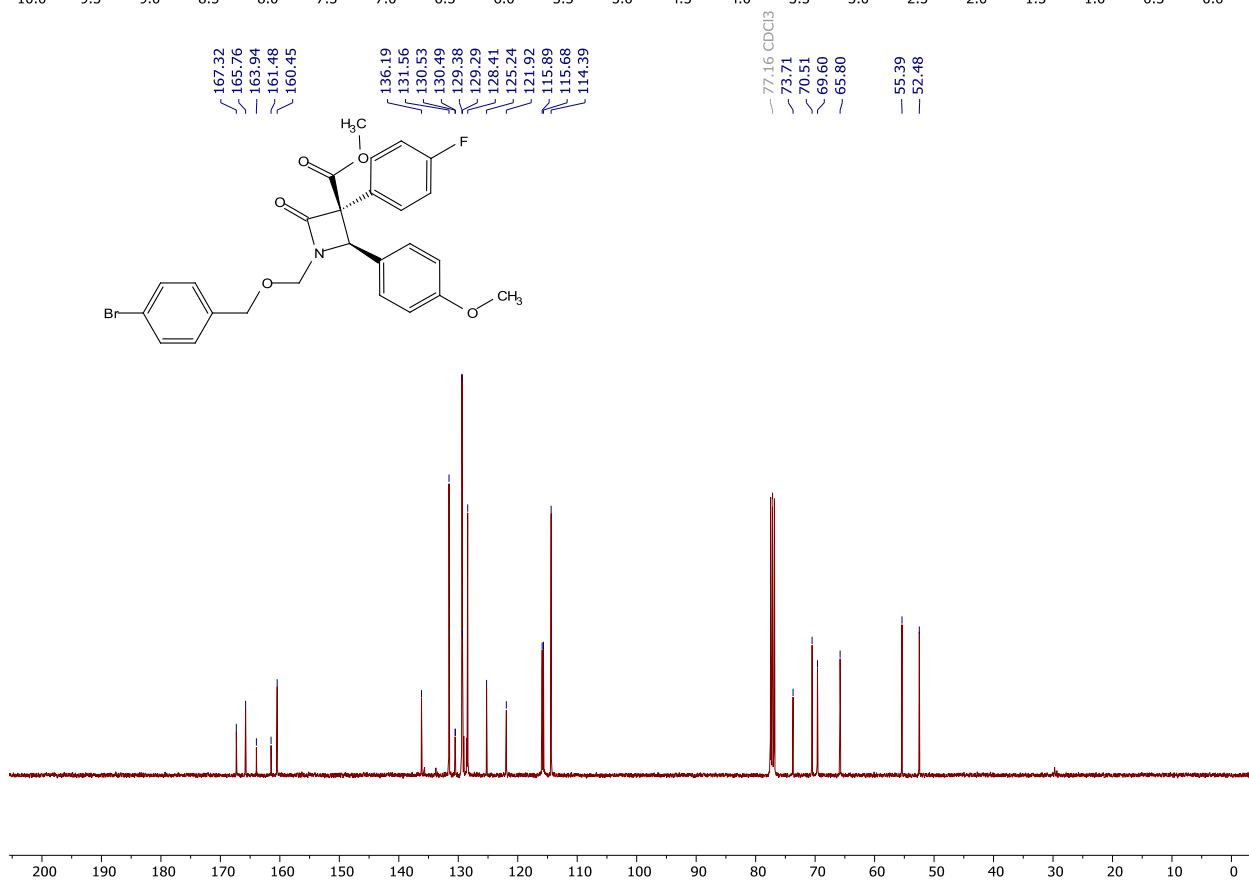



$^1\text{H}$ ,  $^{13}\text{C}$  and  $^{19}\text{F}$  NMR spectra of compound **4k**

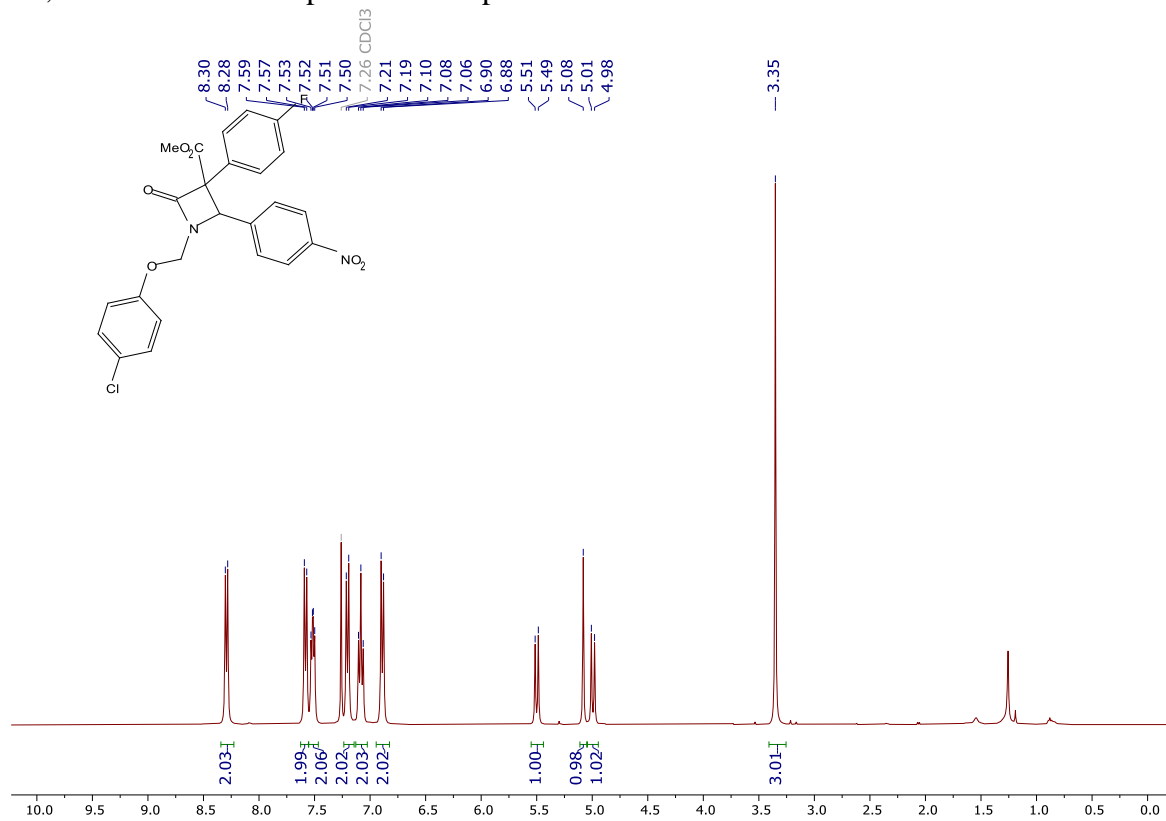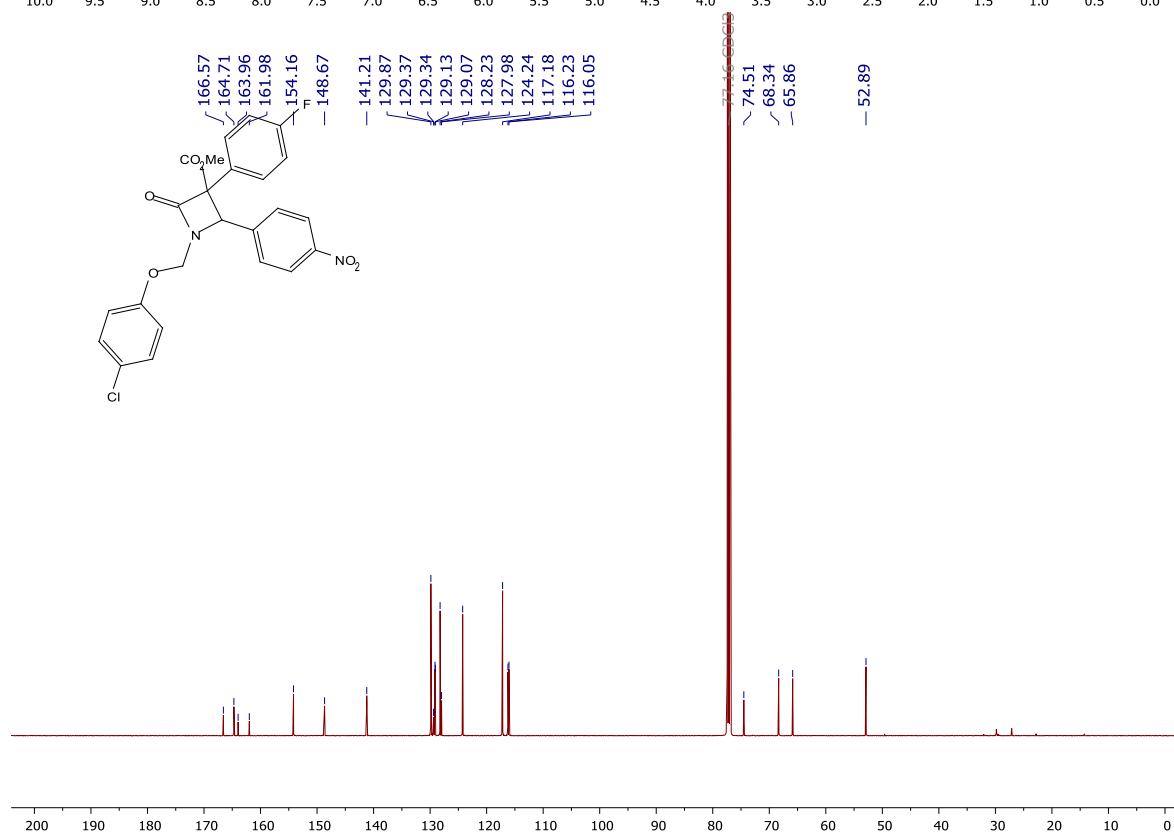

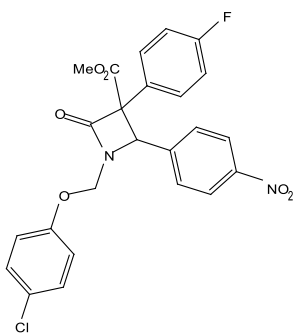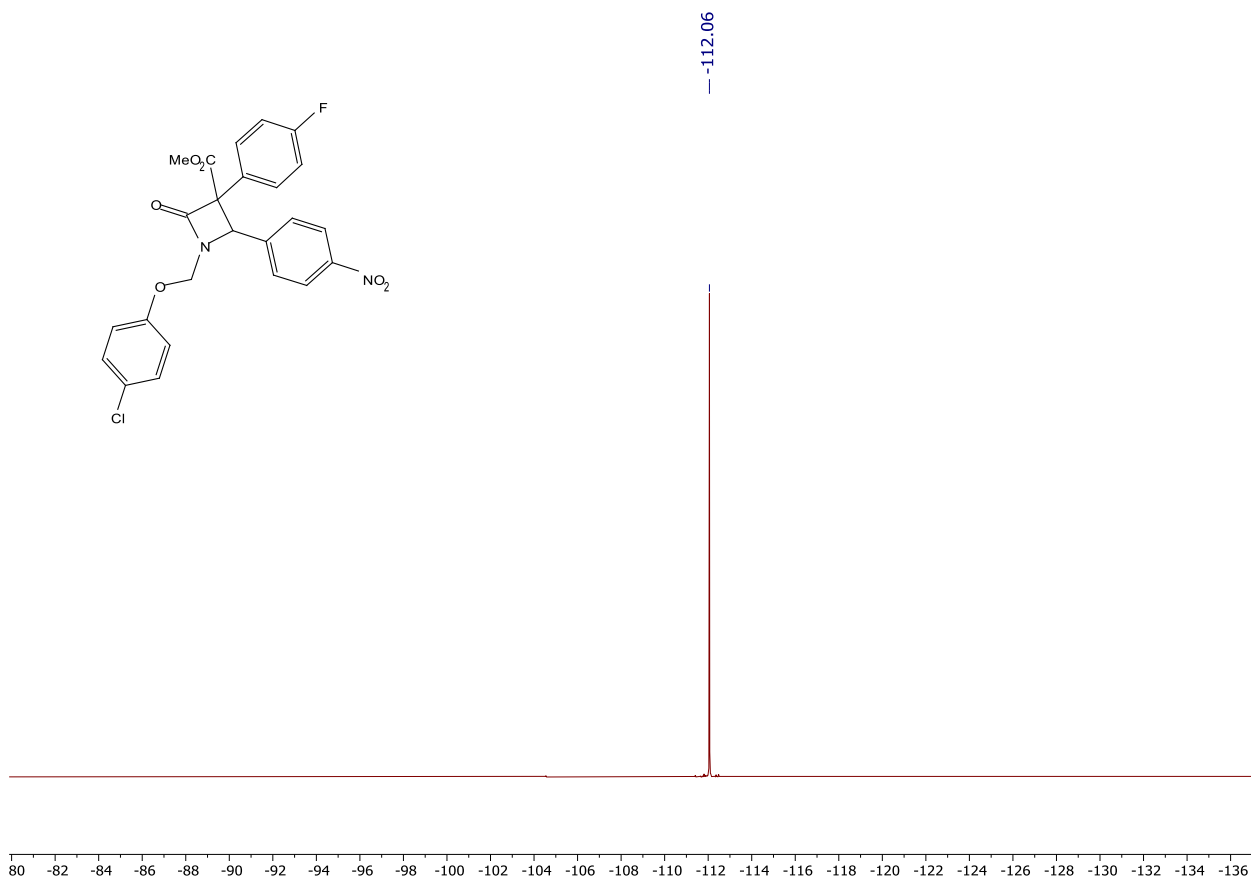

# $^1\text{H}$ and $^{13}\text{C}$ NMR spectra of compound 5

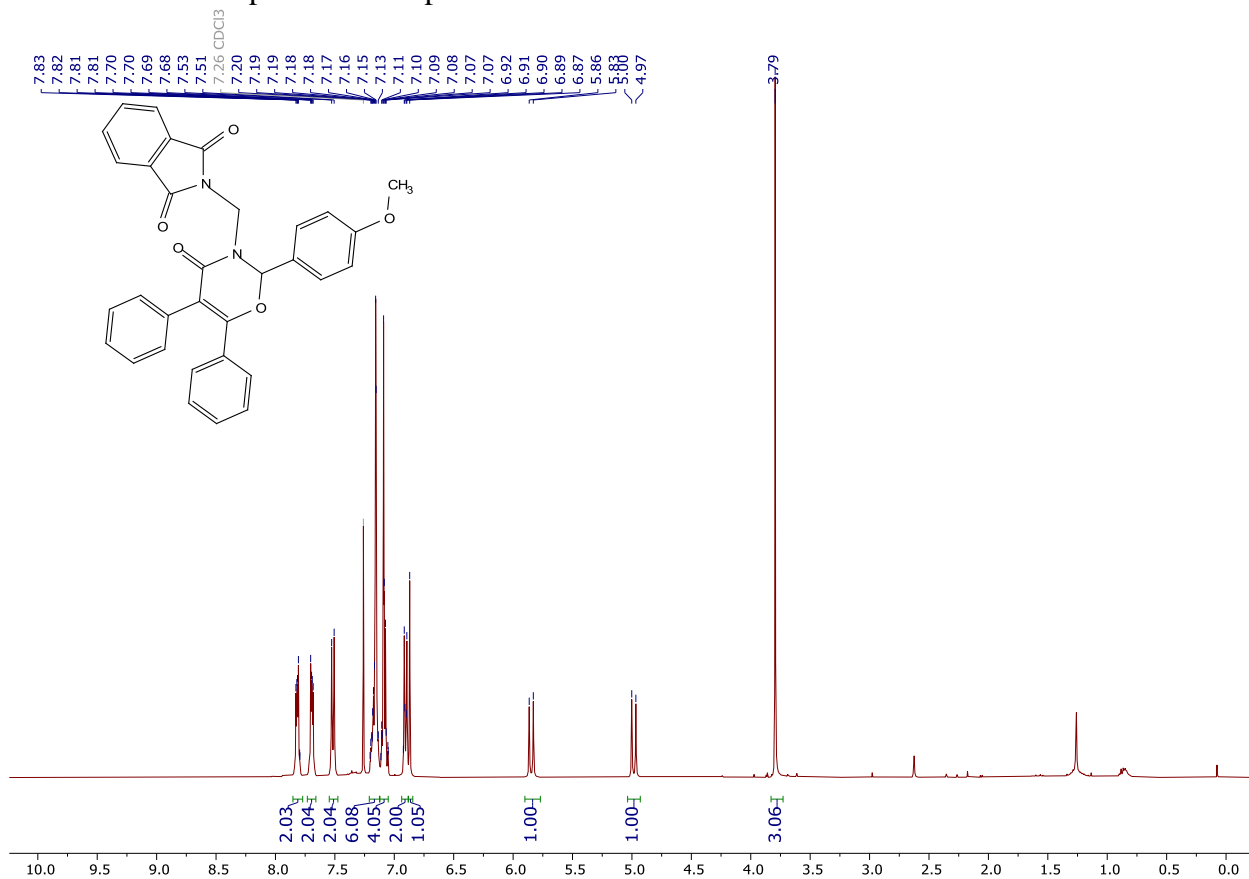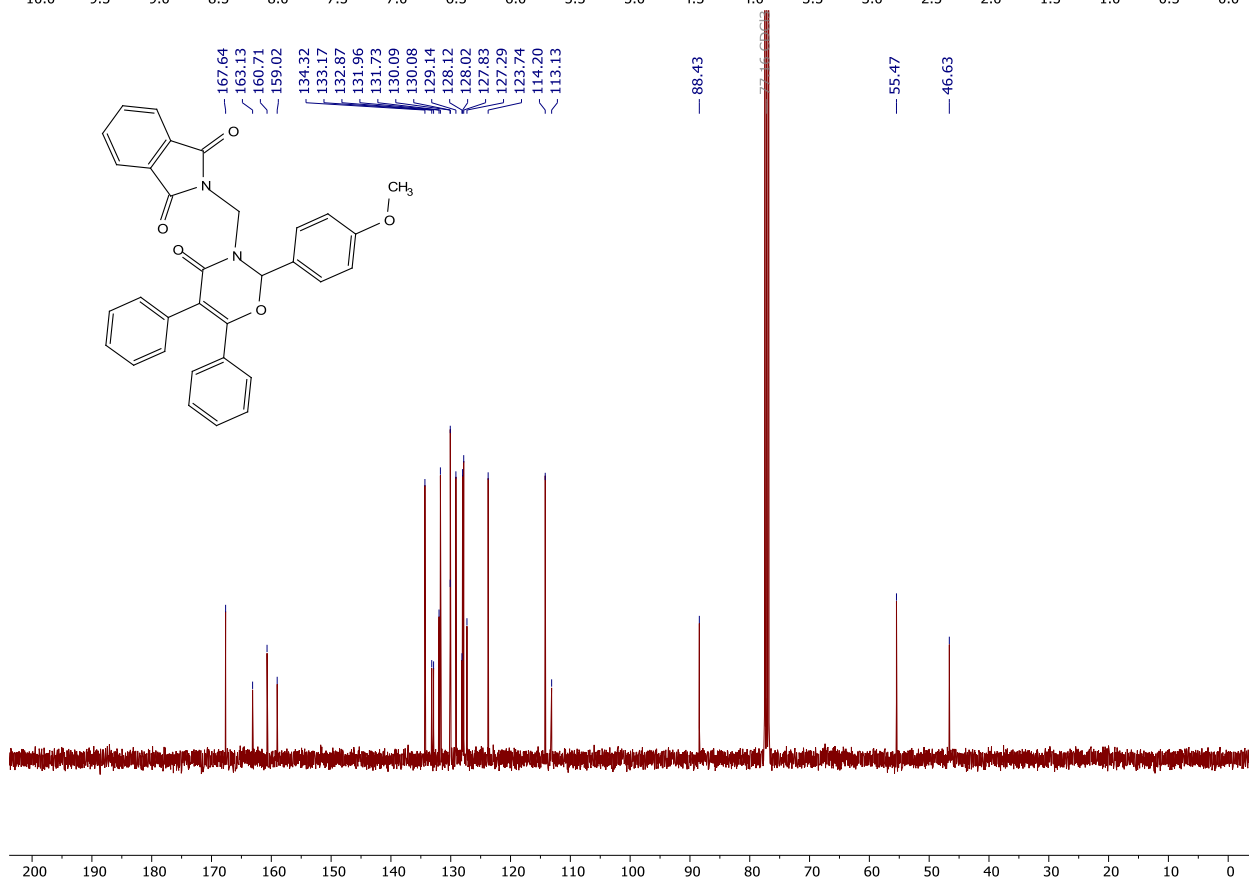

$^1\text{H}$  and  $^{13}\text{C}$  NMR spectra of compound **6a**

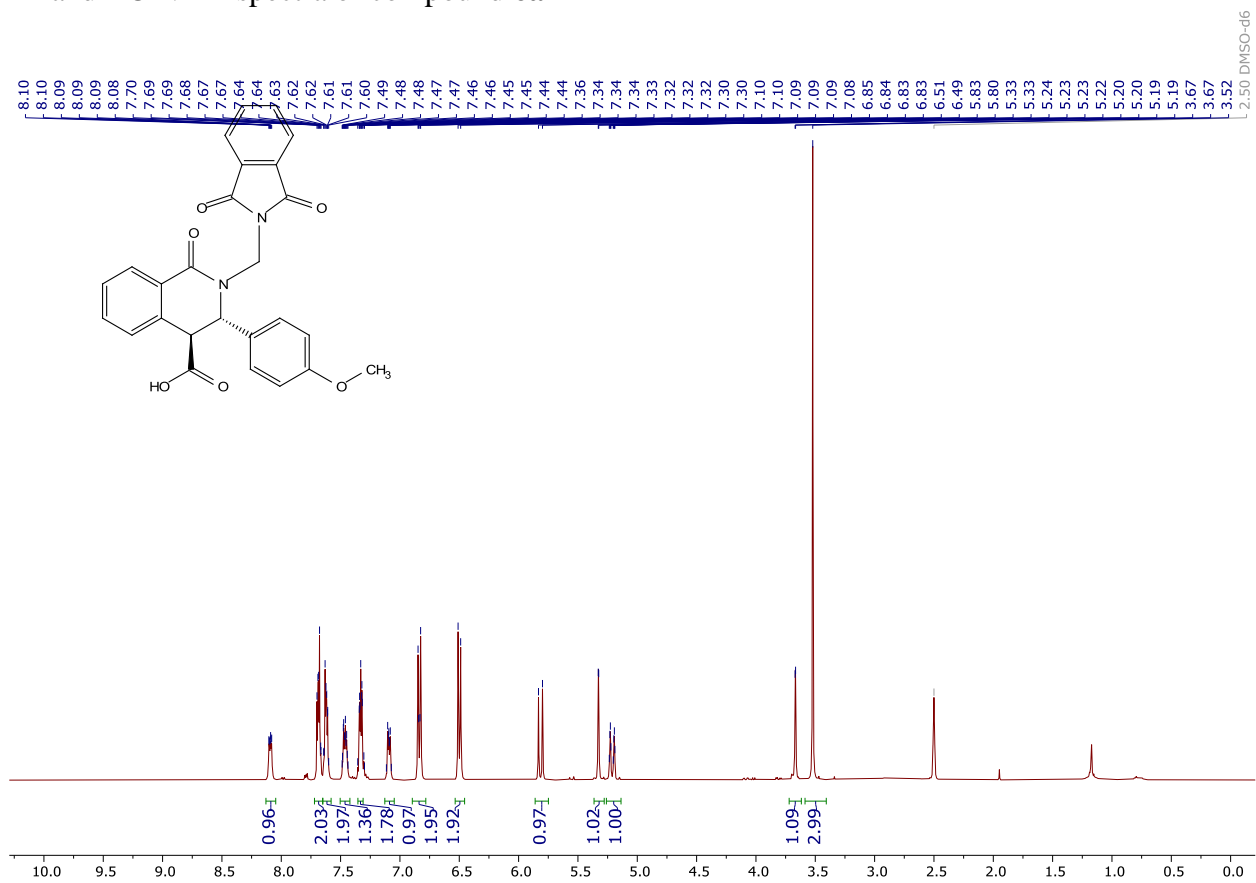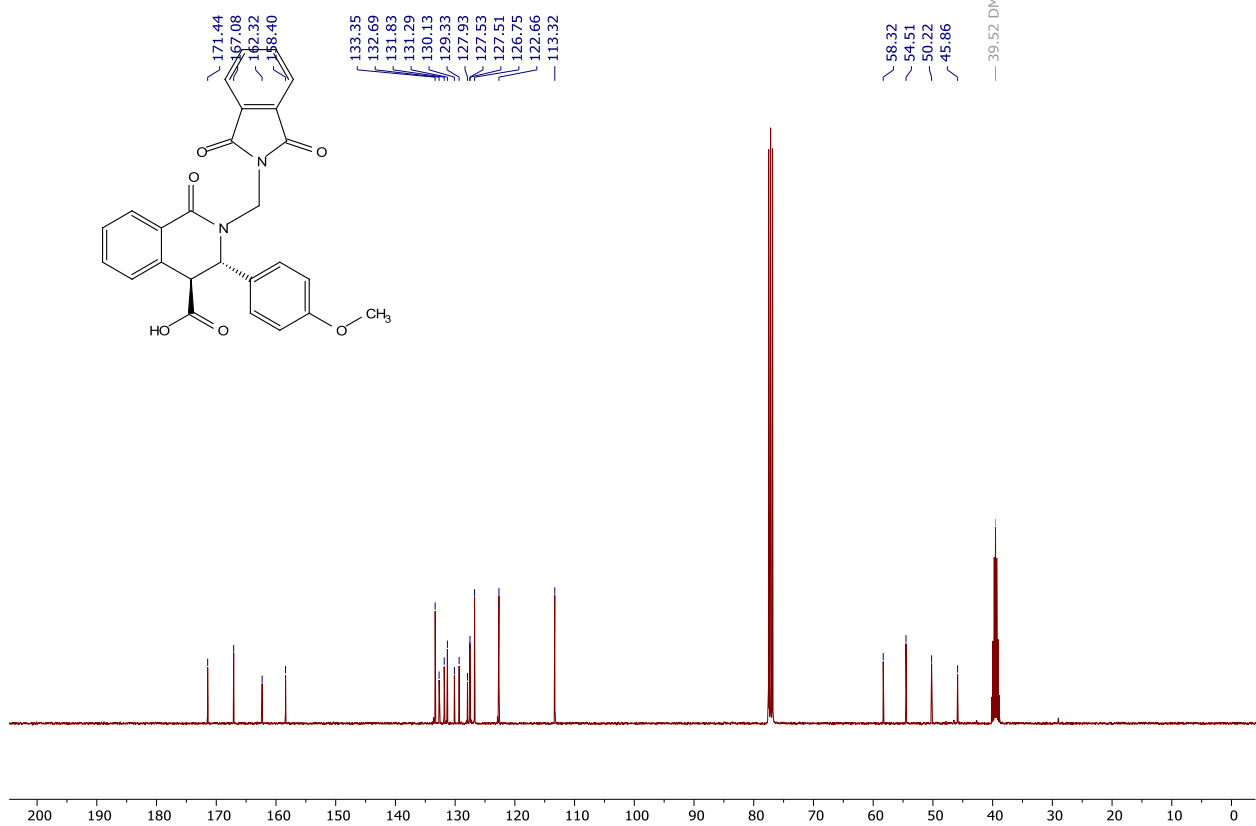

$^1\text{H}$  and  $^{13}\text{C}$  NMR spectra of compound **6b**

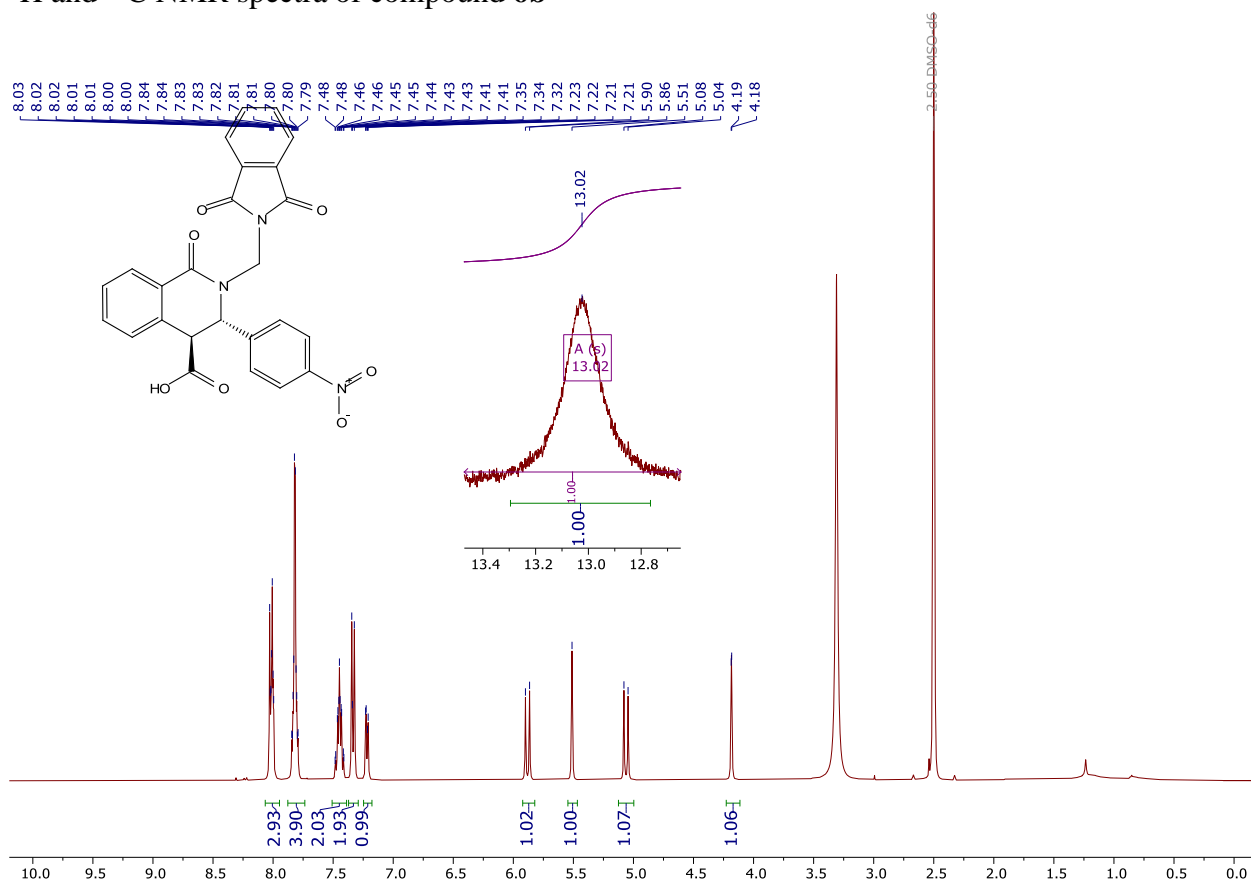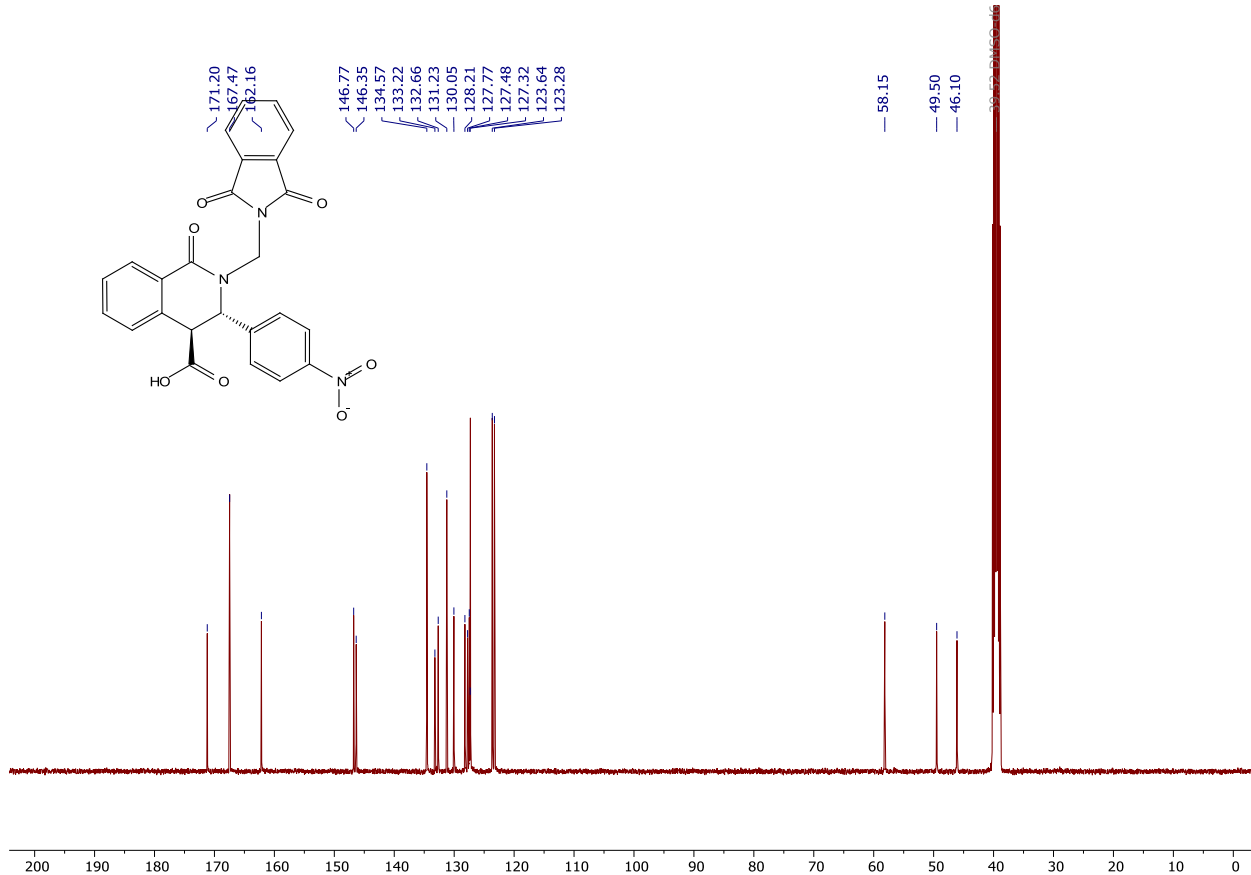



# $^1\text{H}$ and $^{13}\text{C}$ NMR spectra of compound **6c**

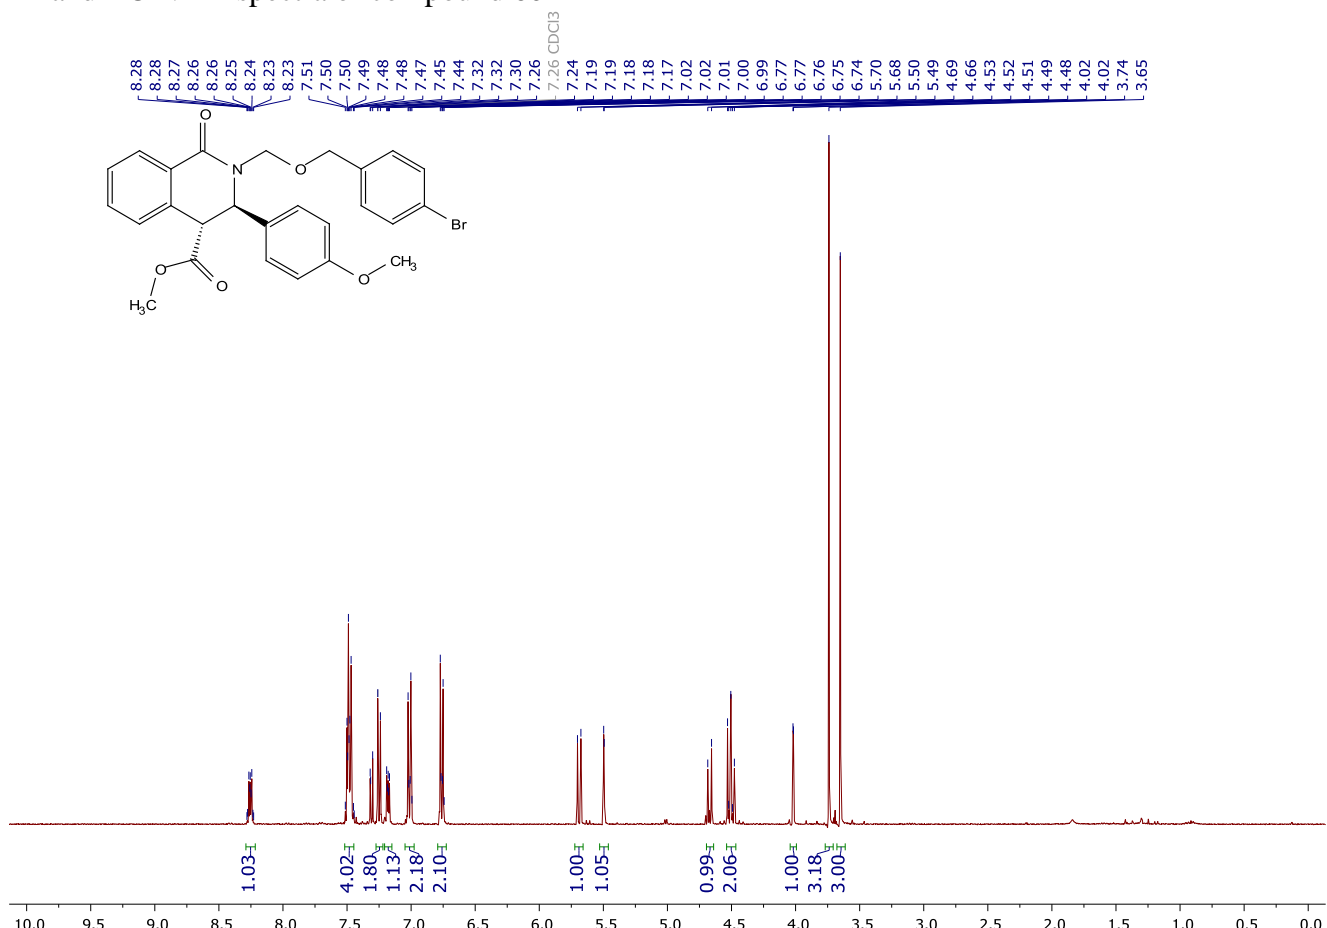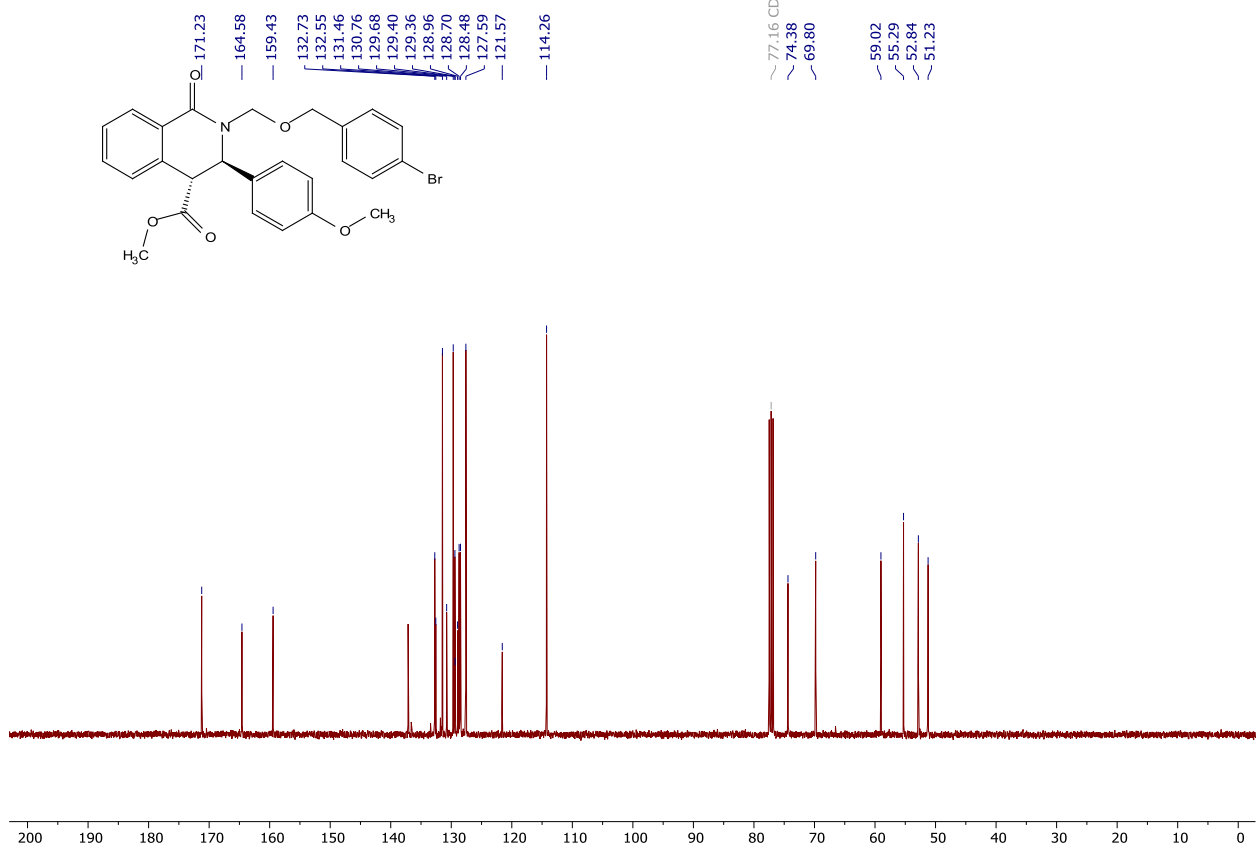

$^1\text{H}$  and  $^{13}\text{C}$  NMR spectra of compound **6d**

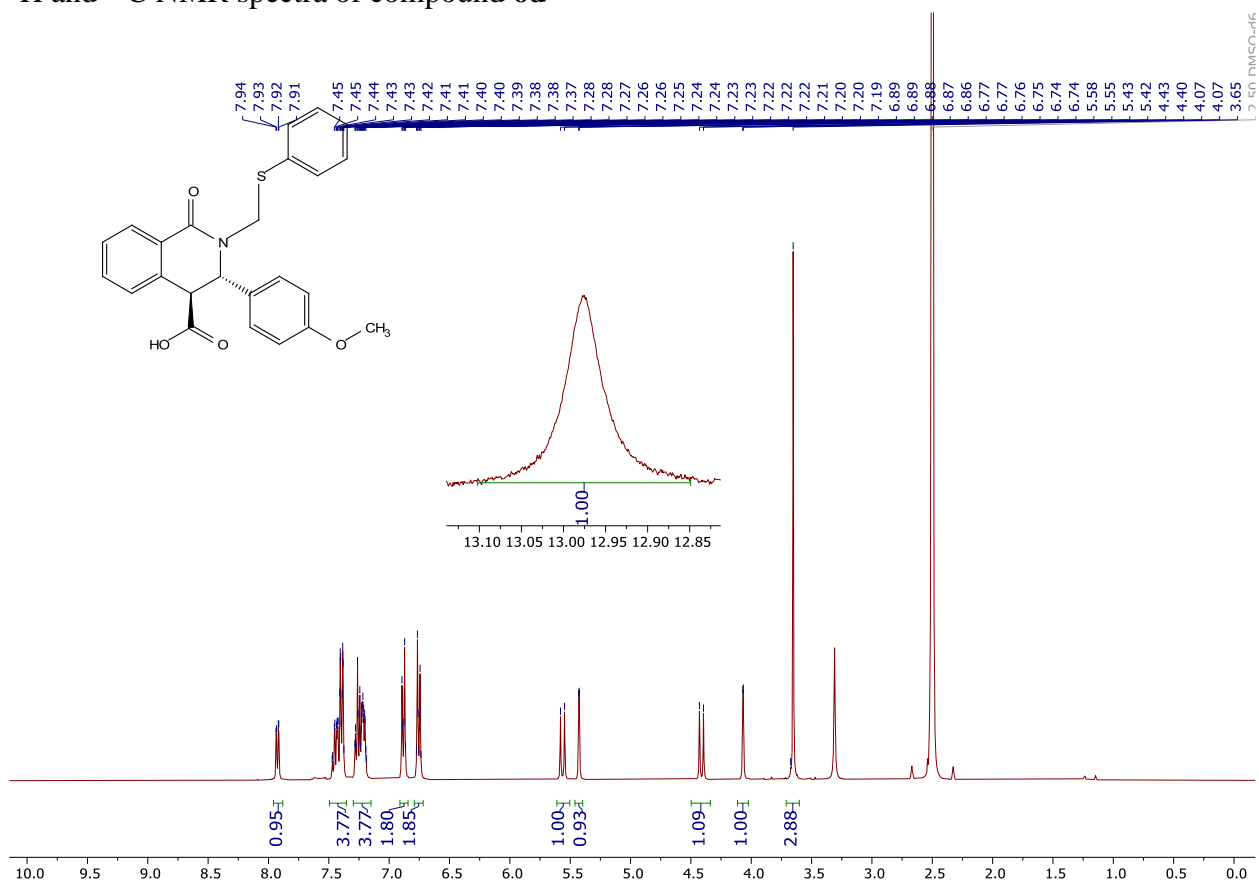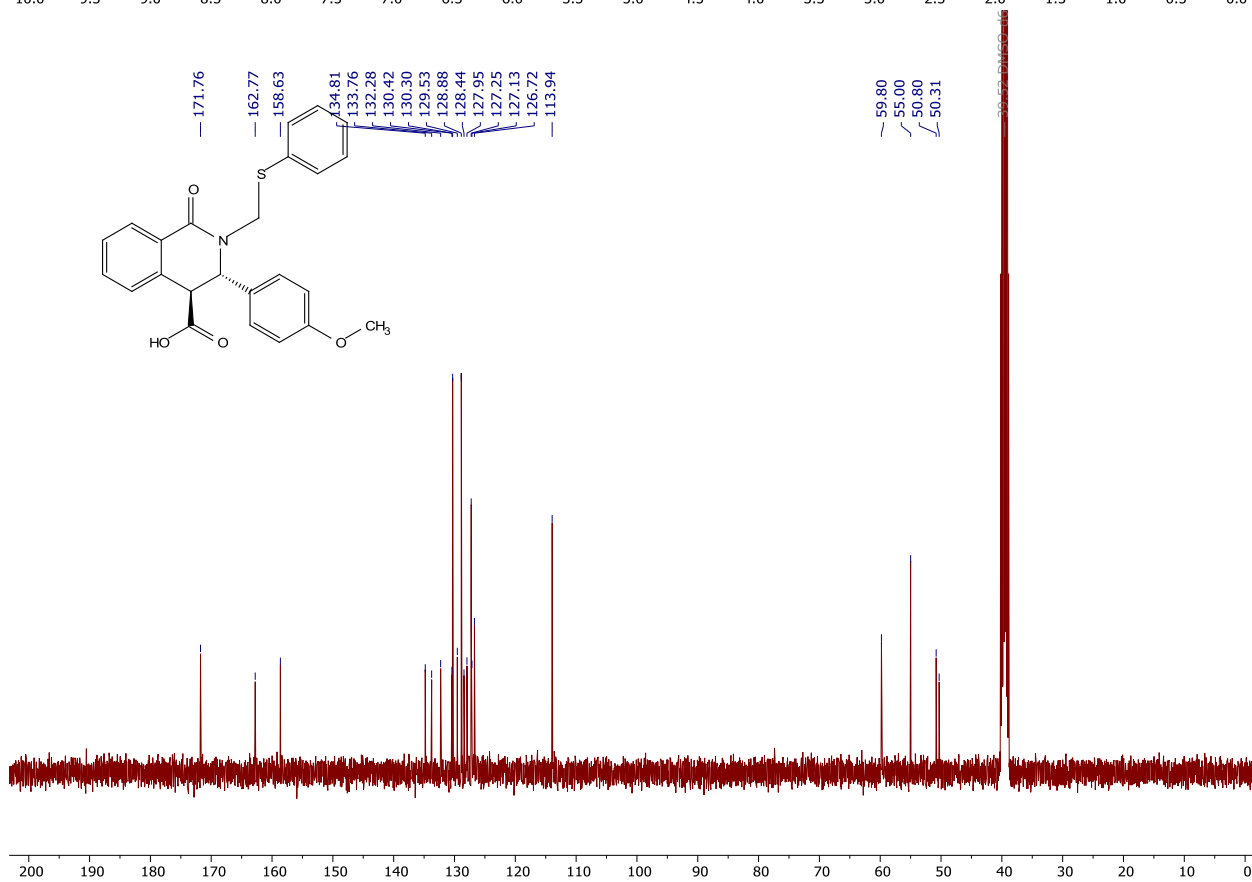

# $^1\text{H}$ and $^{13}\text{C}$ NMR spectra of compound **6e**

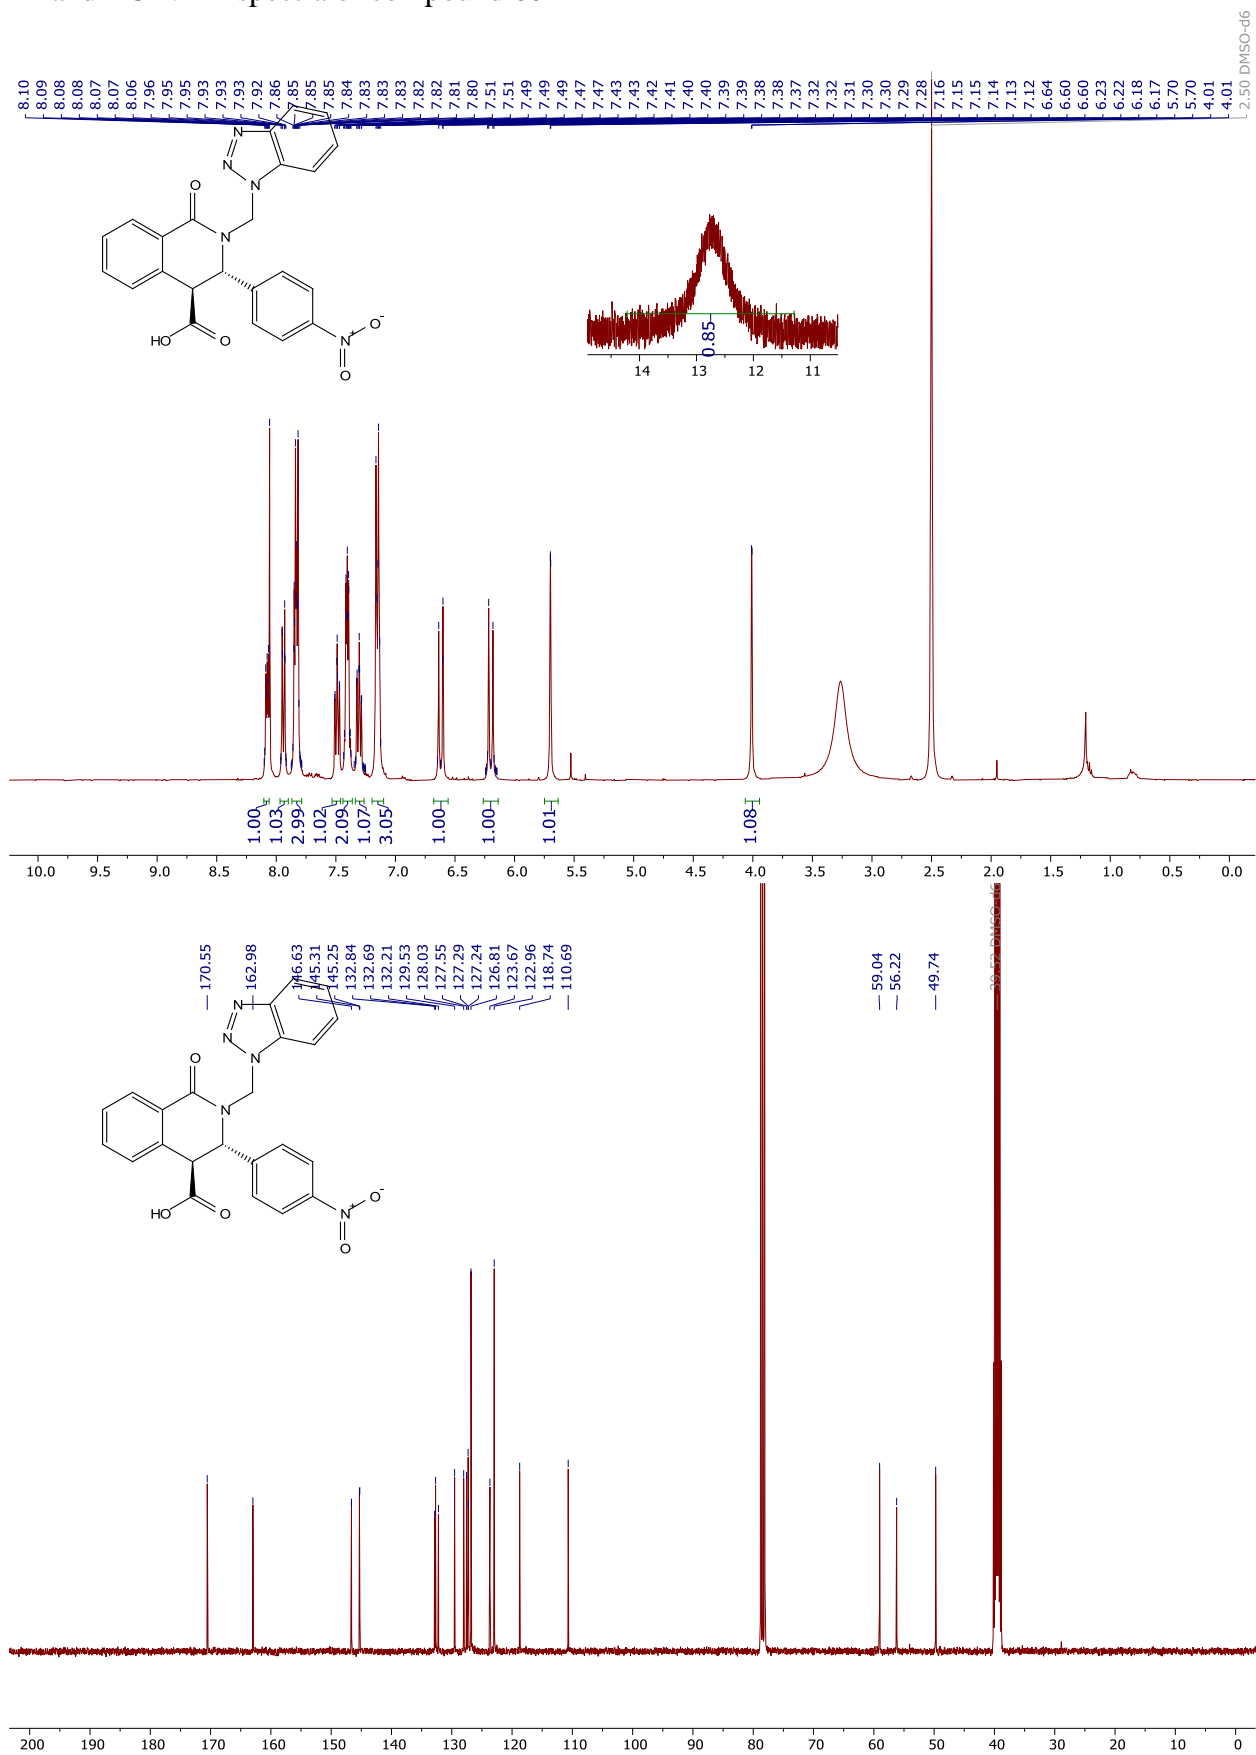

# $^1\text{H}$ and $^{13}\text{C}$ NMR spectra of compound **6f**

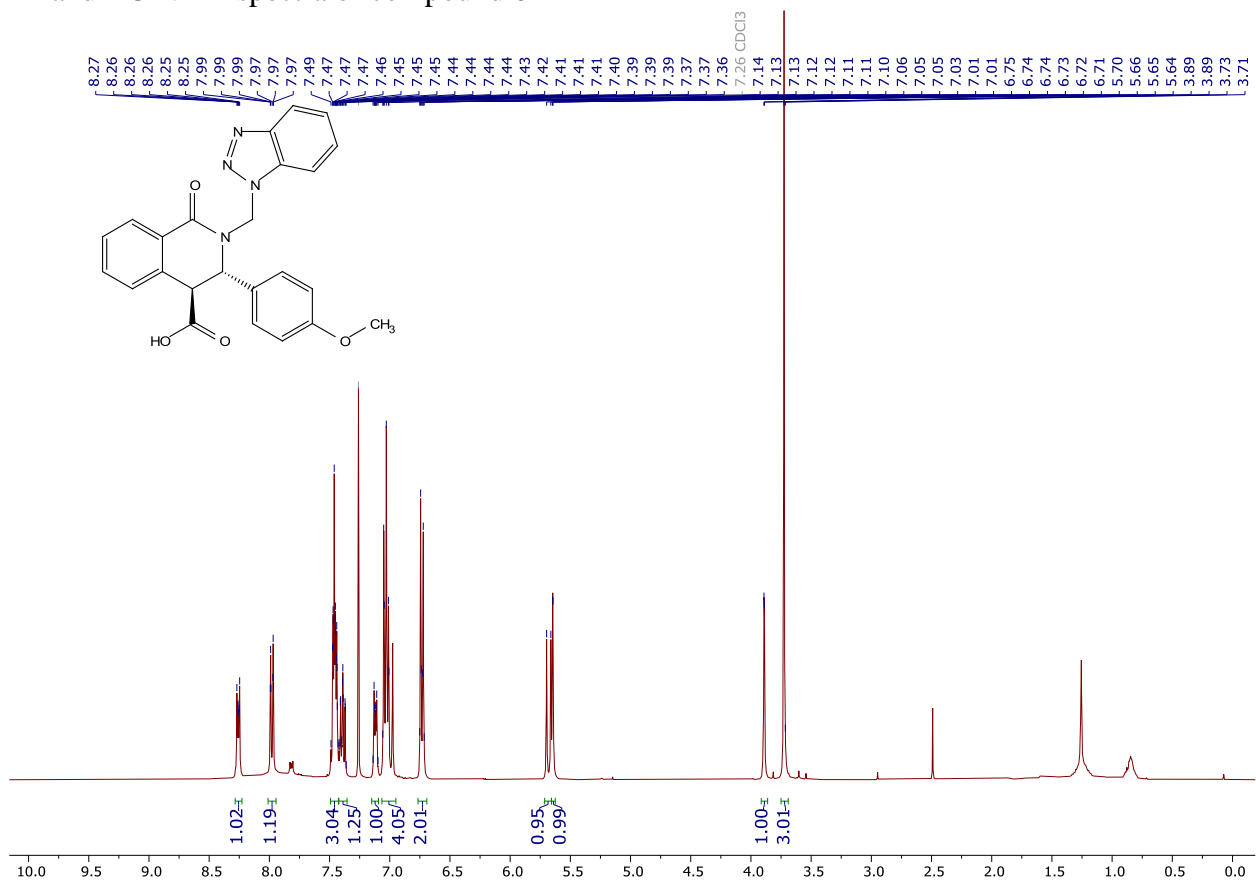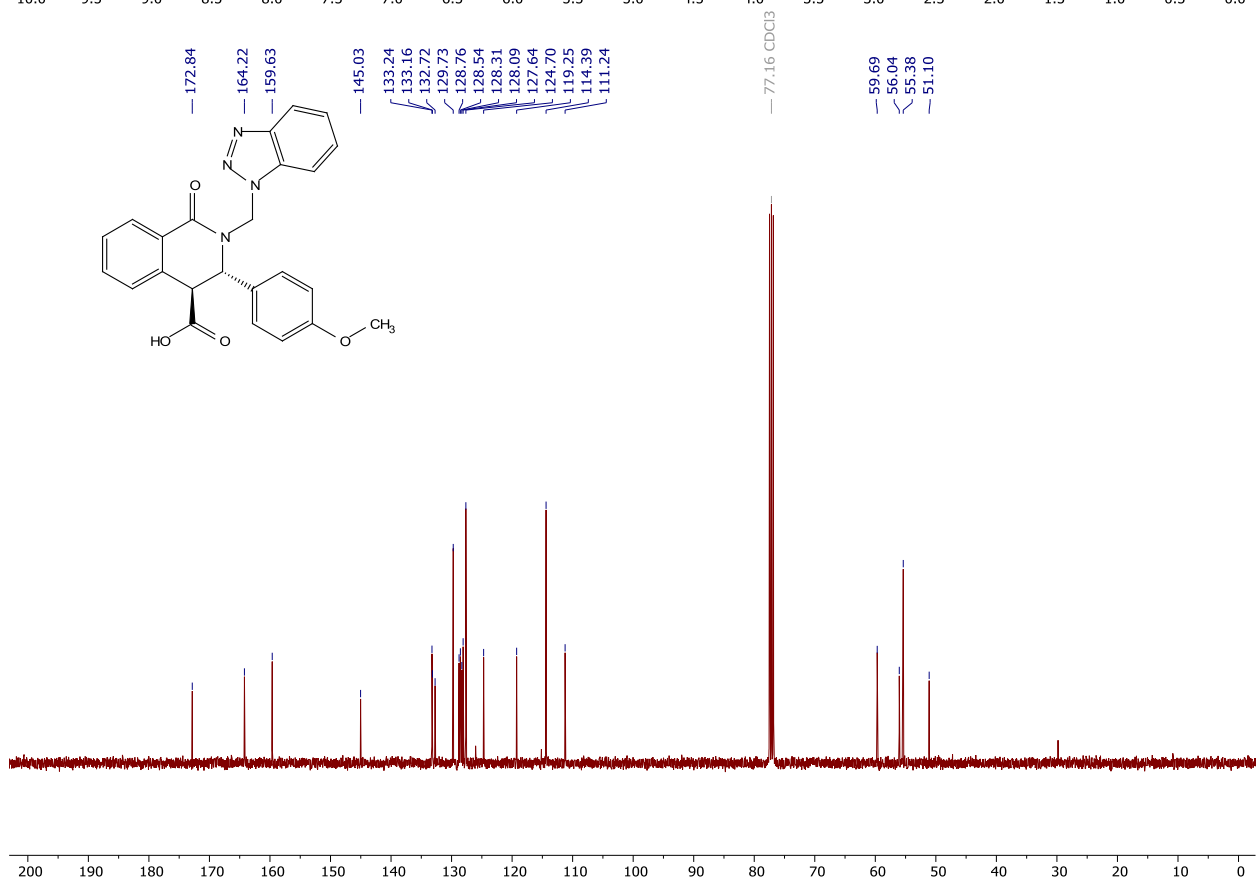

$^1\text{H}$  and  $^{13}\text{C}$  NMR spectra of compound **6g**

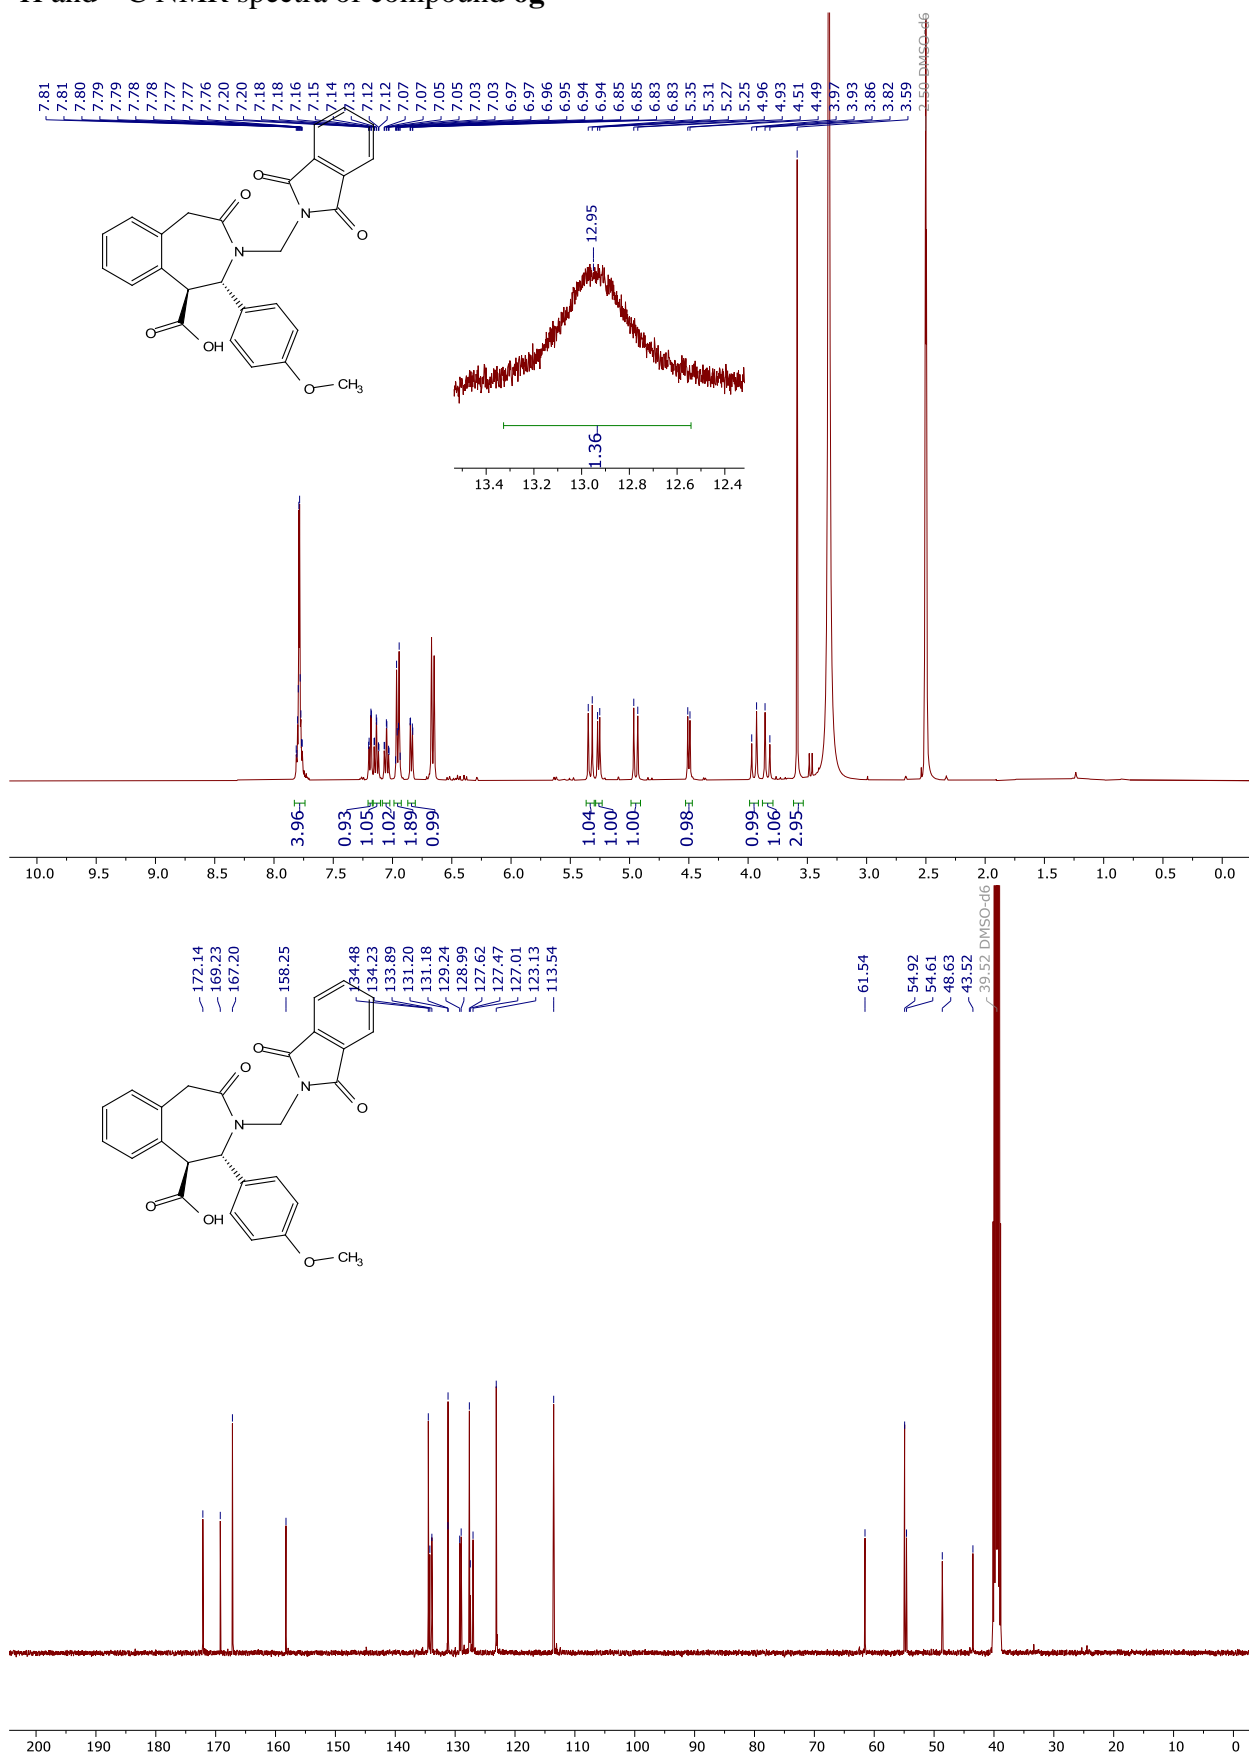

$^1\text{H}$  and  $^{13}\text{C}$  NMR spectra of compound **6h**

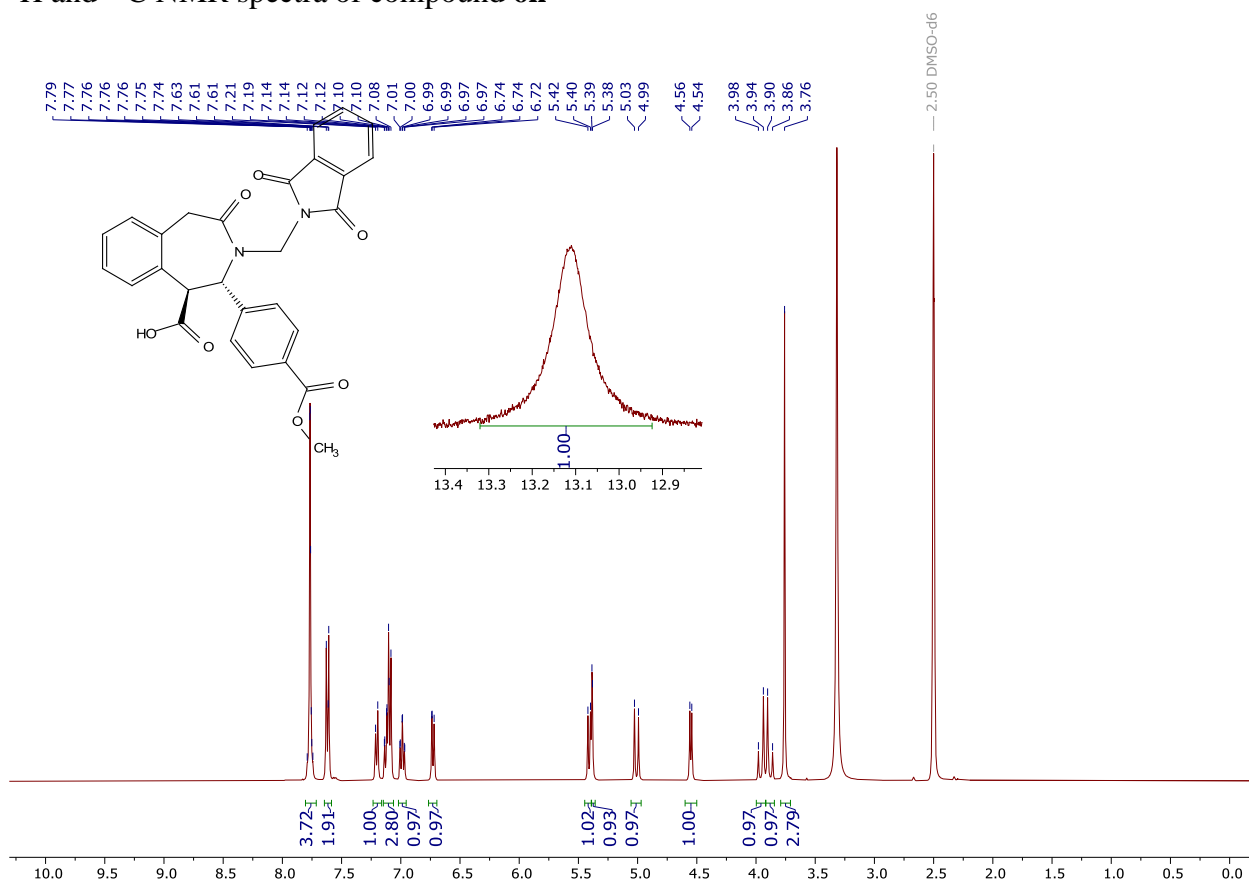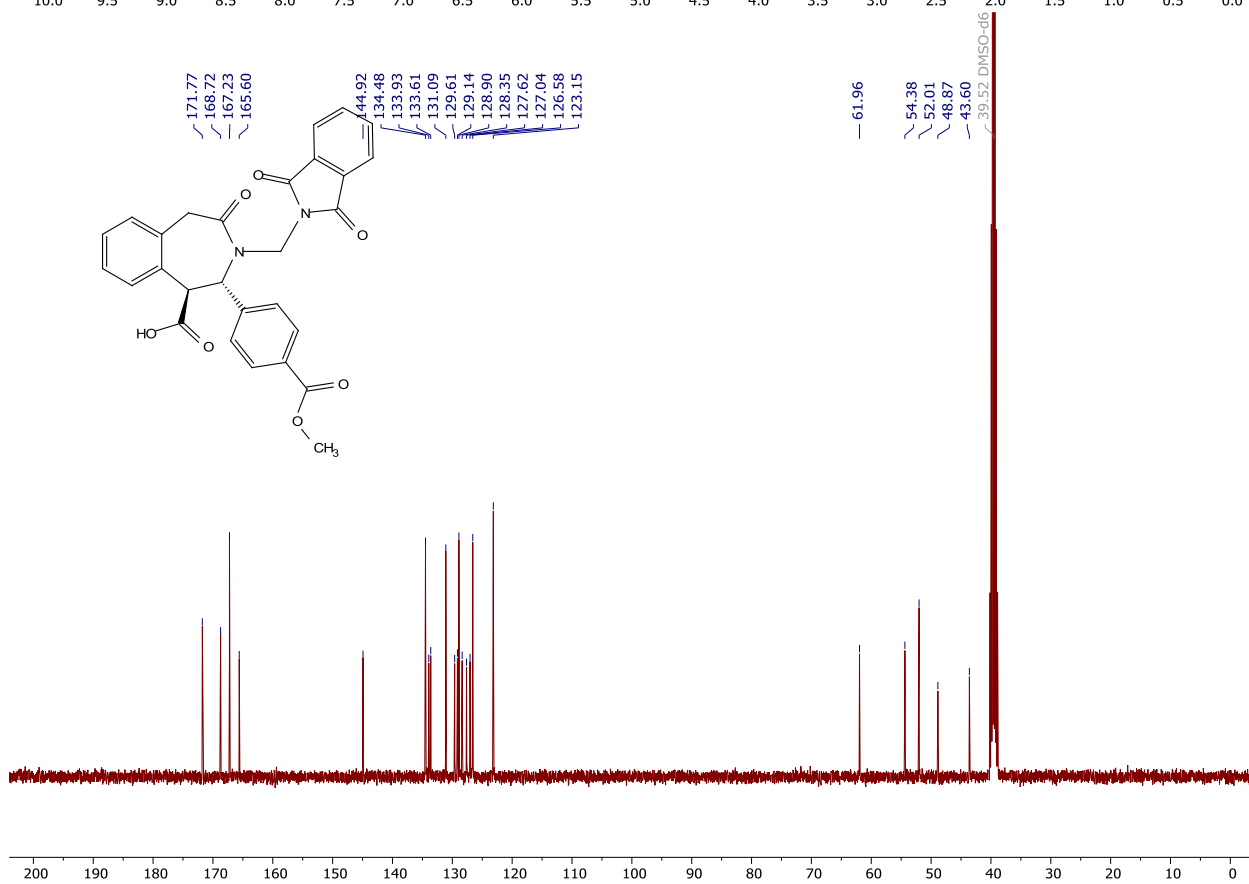

# $^1\text{H}$ and $^{13}\text{C}$ NMR spectra of compound **6i**

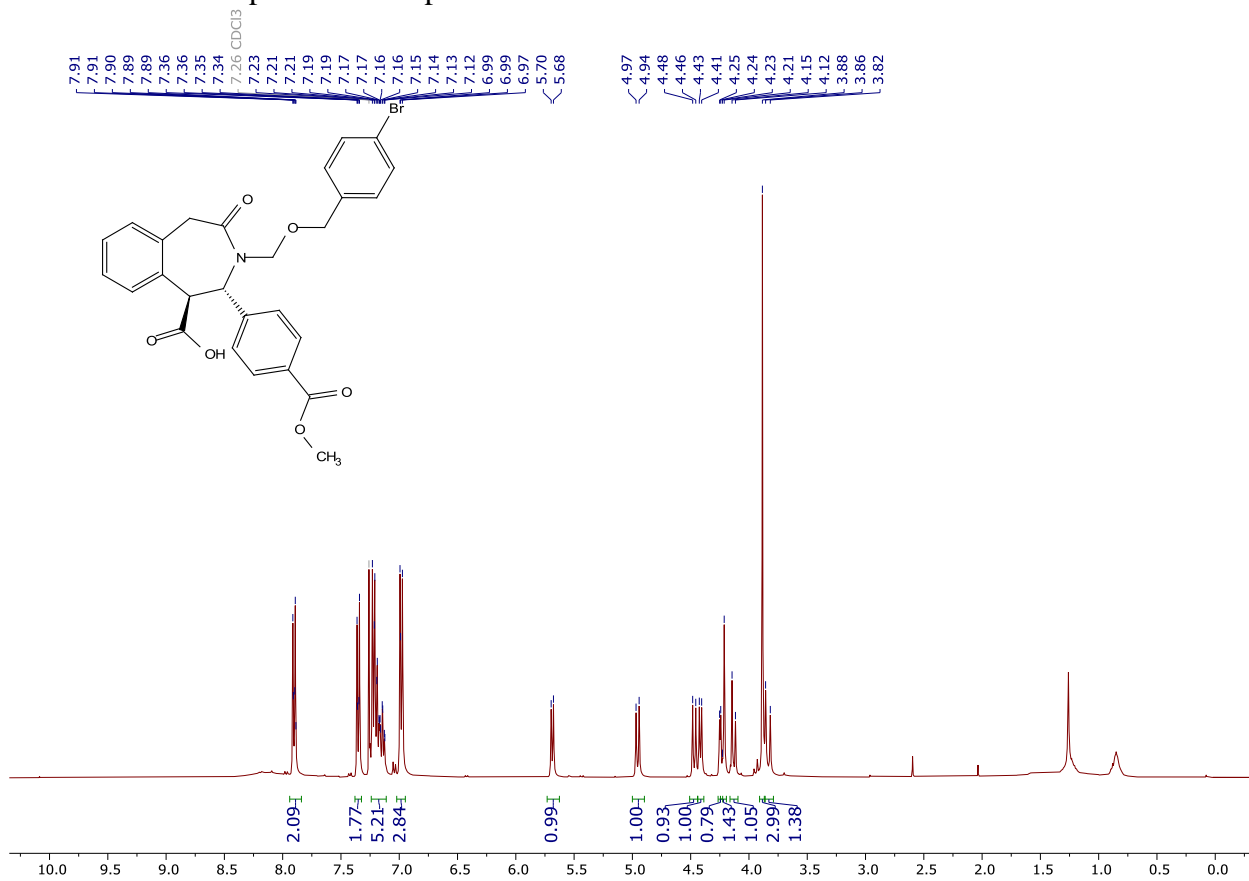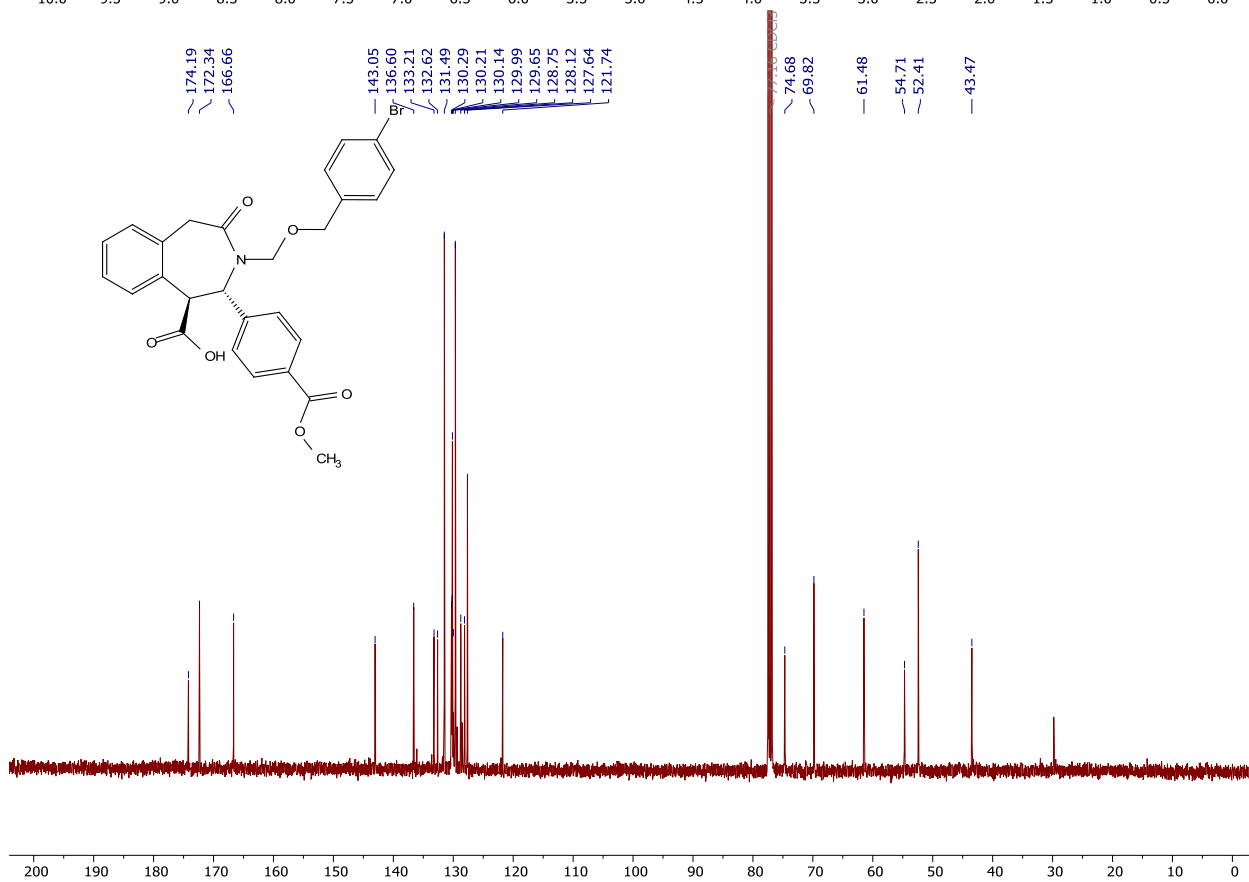

$^1\text{H}$  and  $^{13}\text{C}$  NMR spectra of compound **7a**

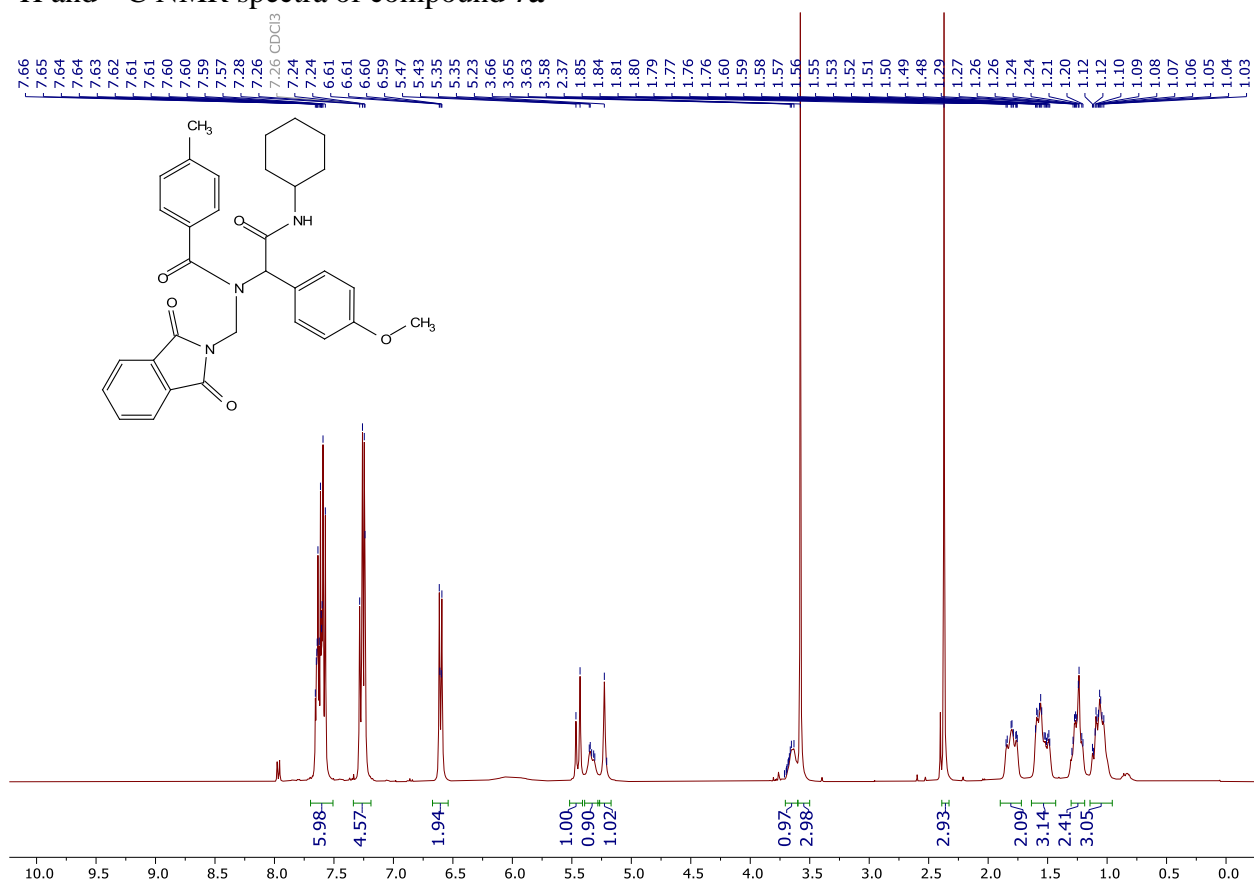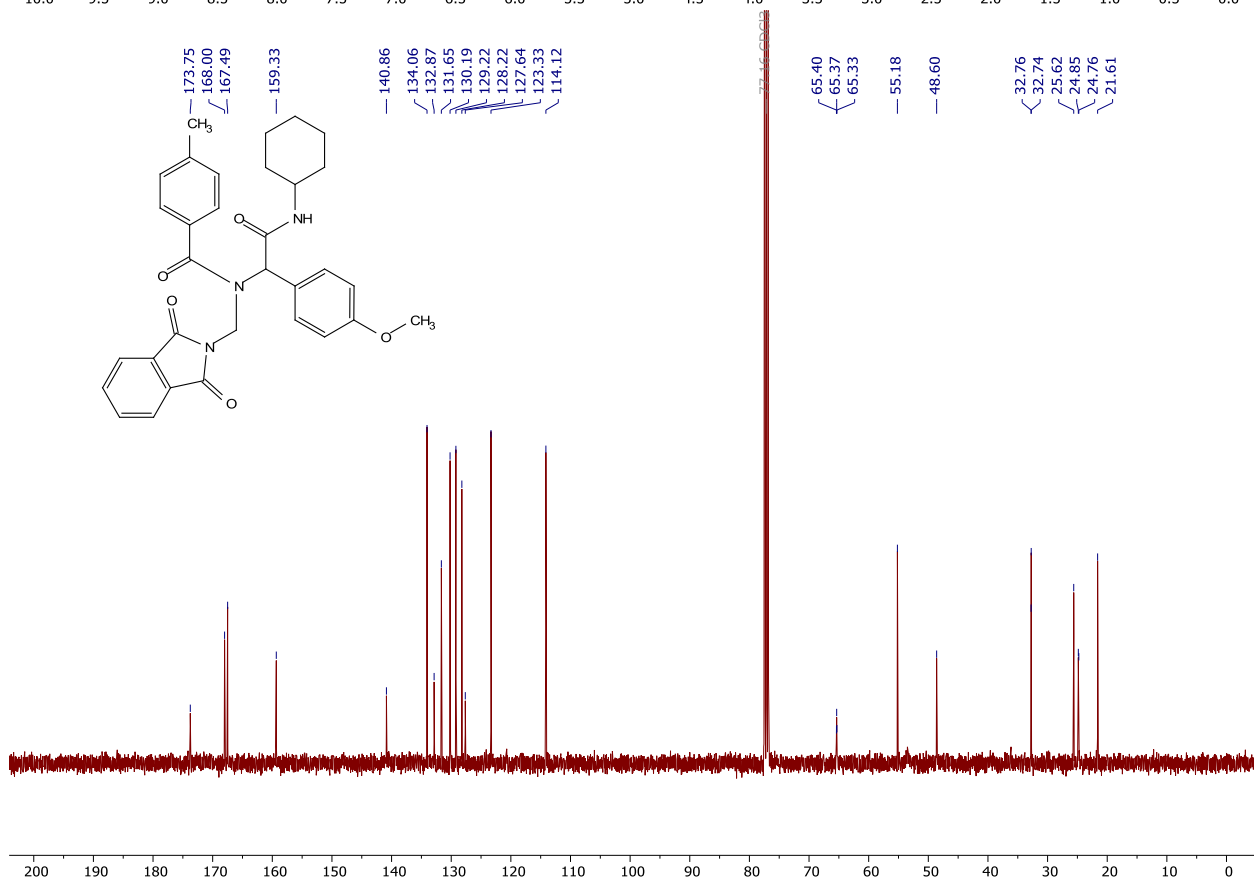



# <sup>1</sup>H and <sup>13</sup>C NMR spectra of compound **7b**

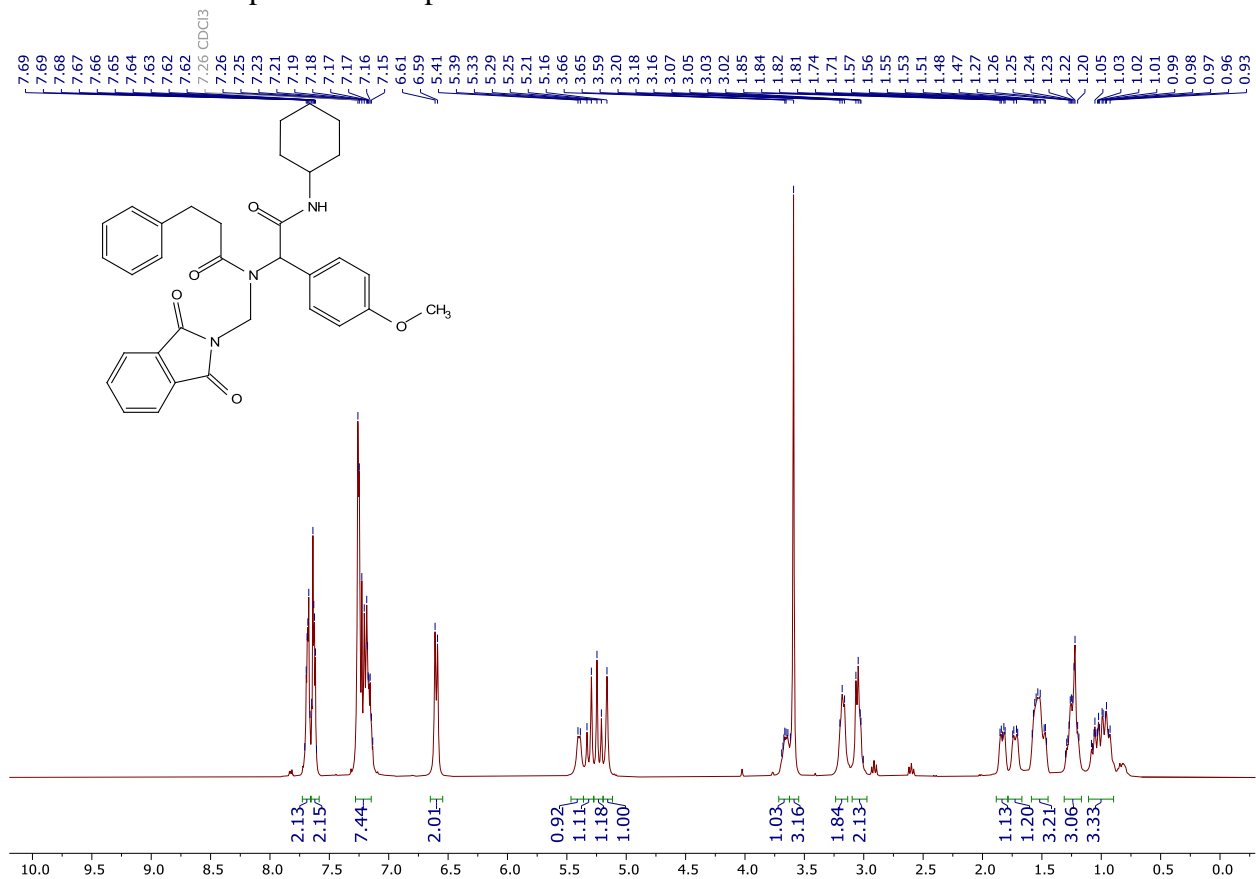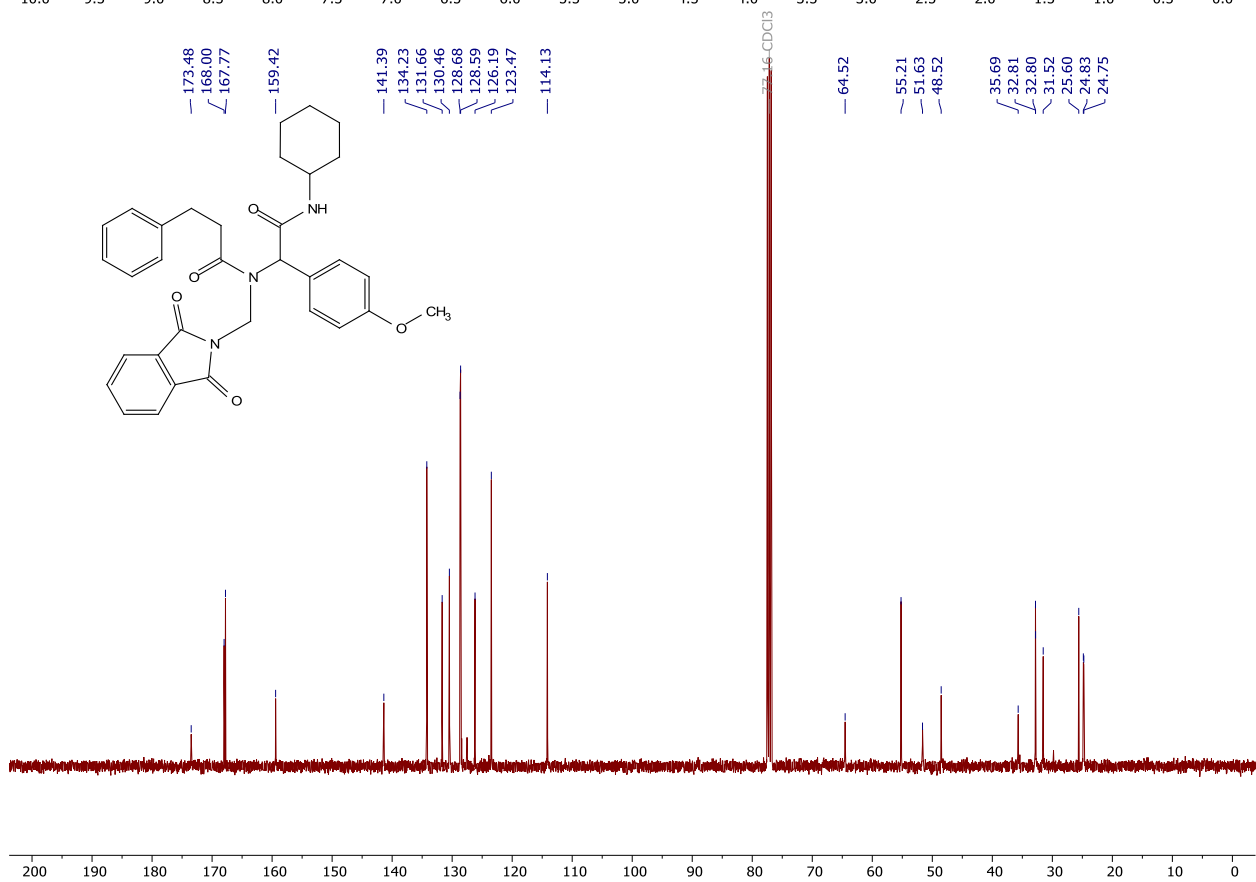



# $^1\text{H}$ and $^{13}\text{C}$ NMR spectra of compound **7d**

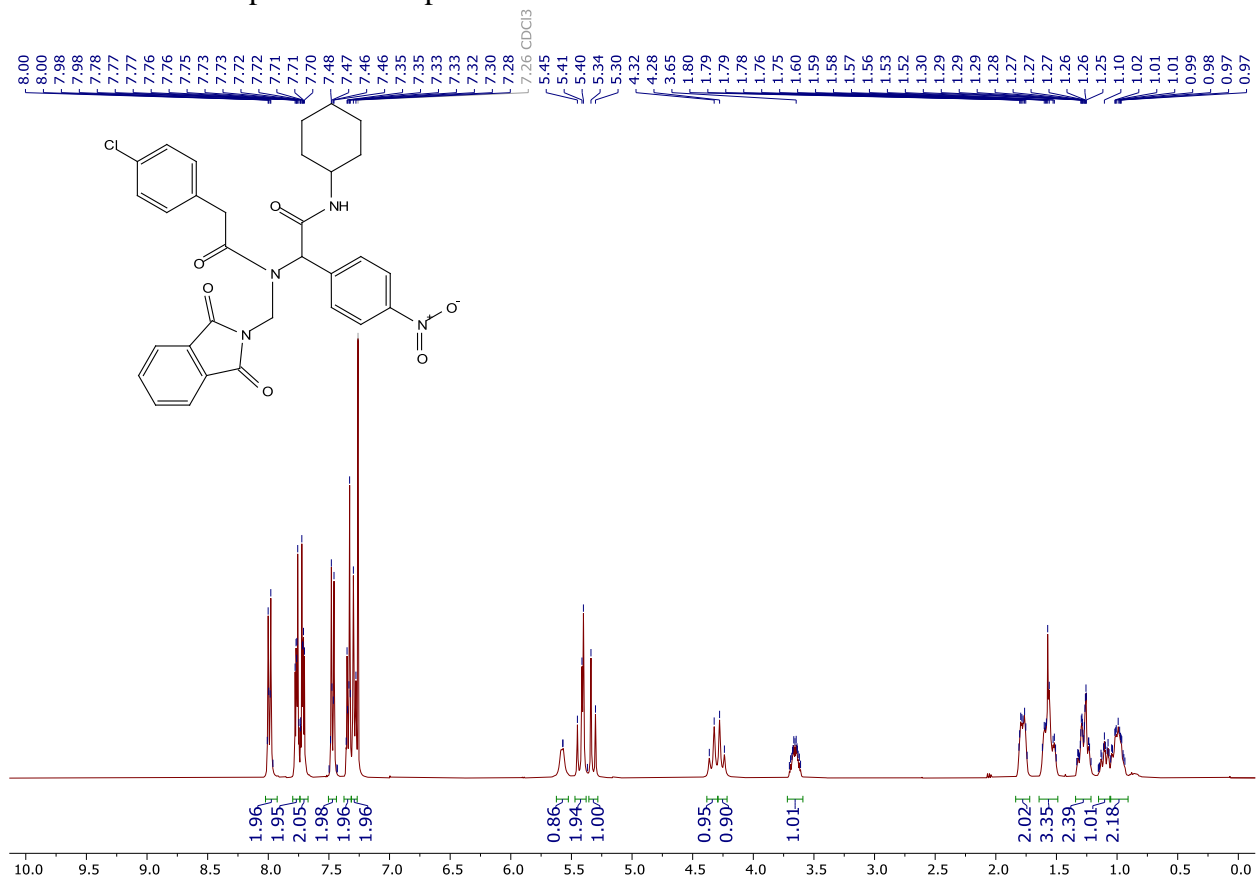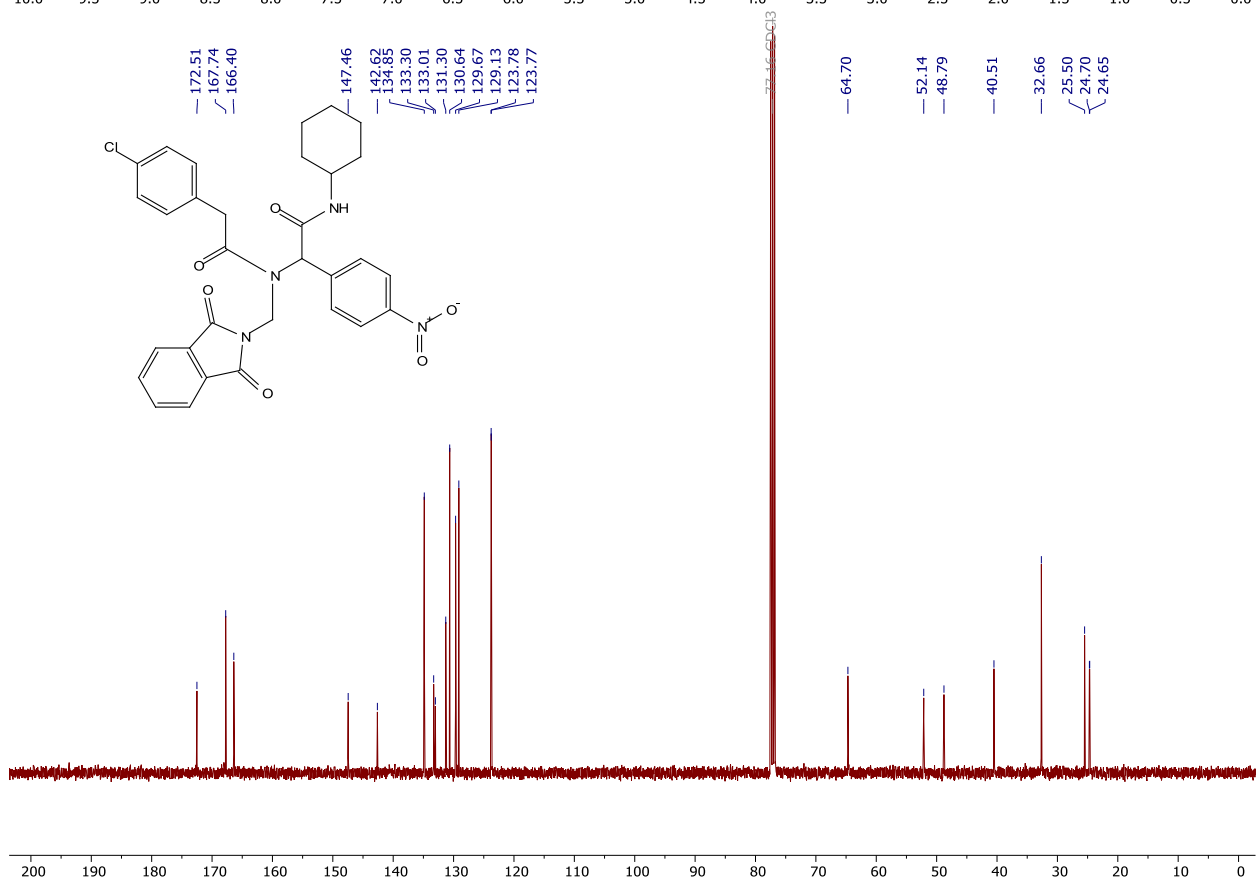

# $^1\text{H}$ and $^{13}\text{C}$ NMR spectra of compound **7e**

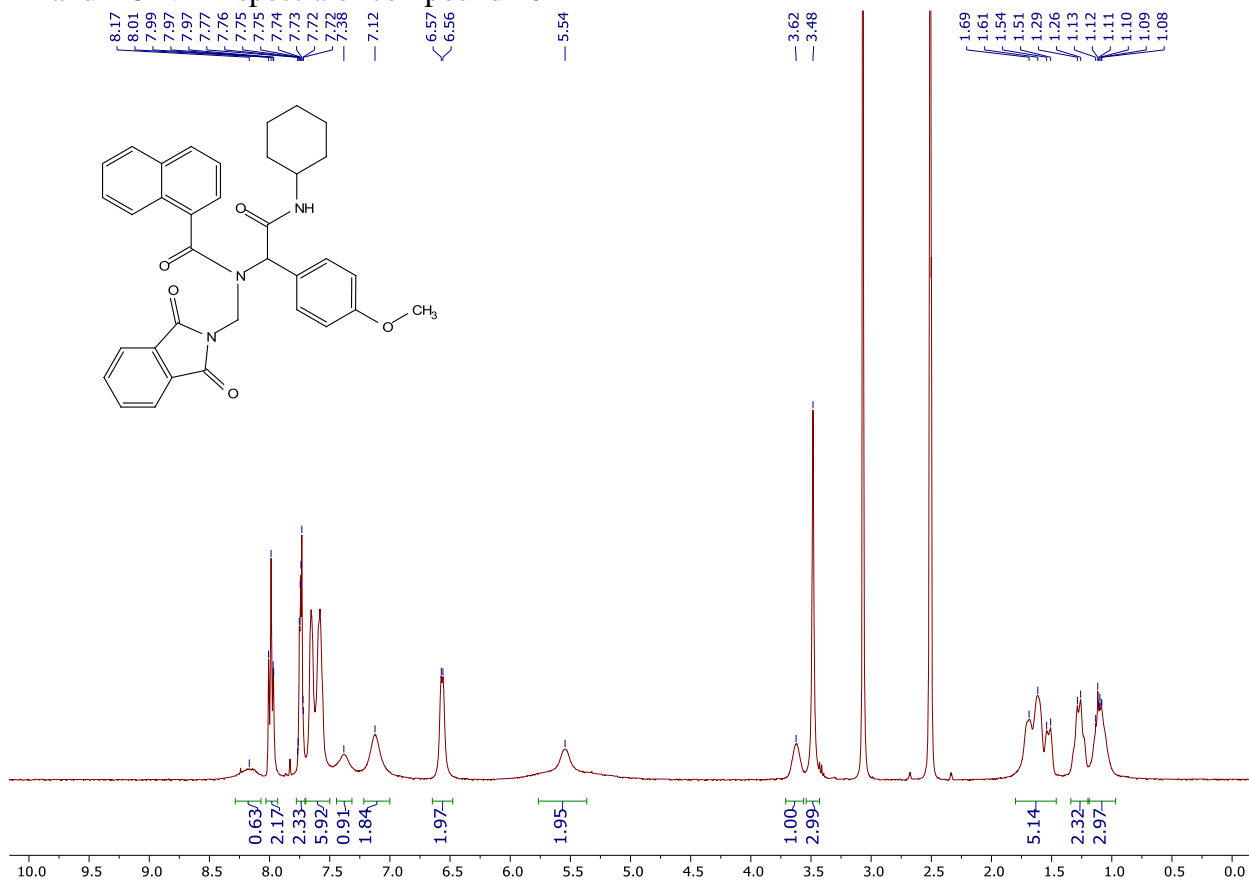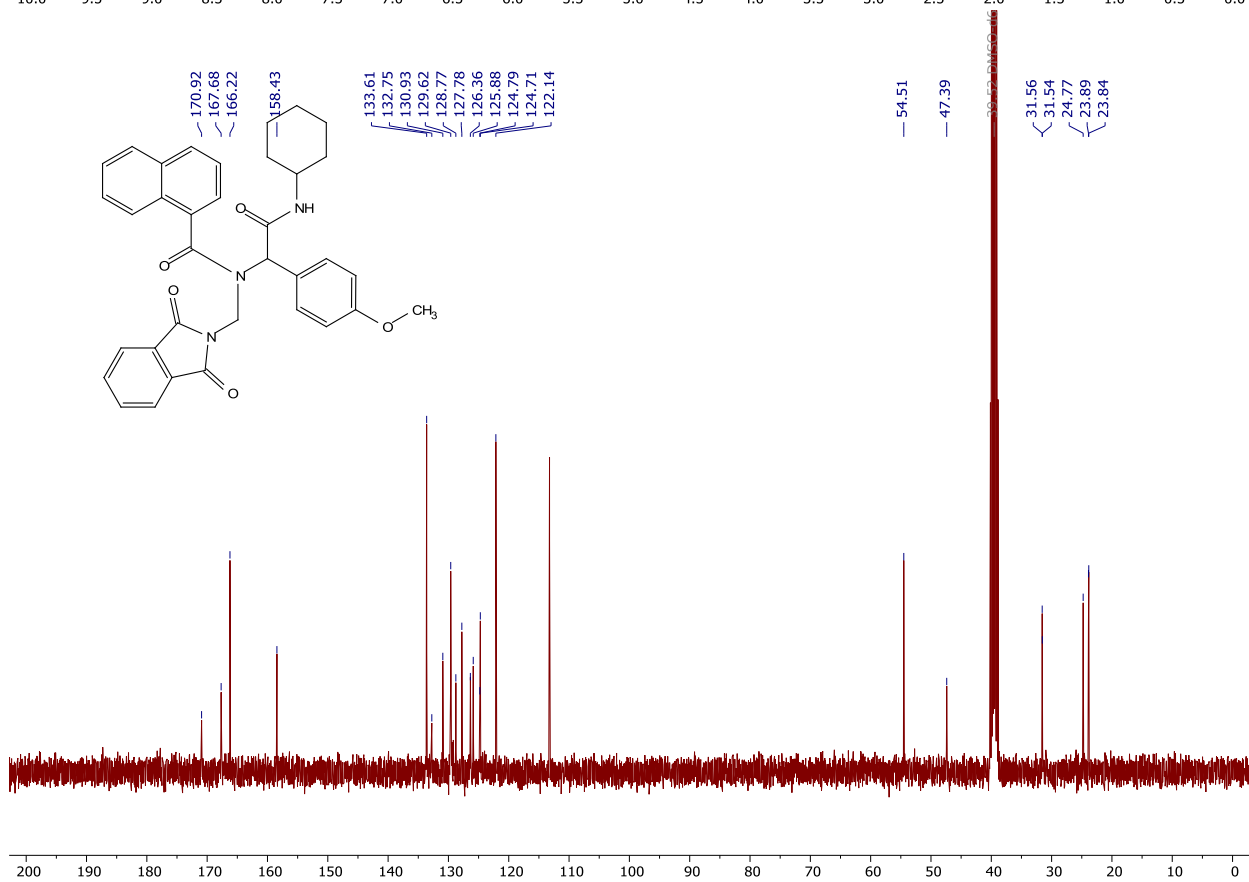

$^1\text{H}$  and  $^{13}\text{C}$  NMR spectra of compound **7f**

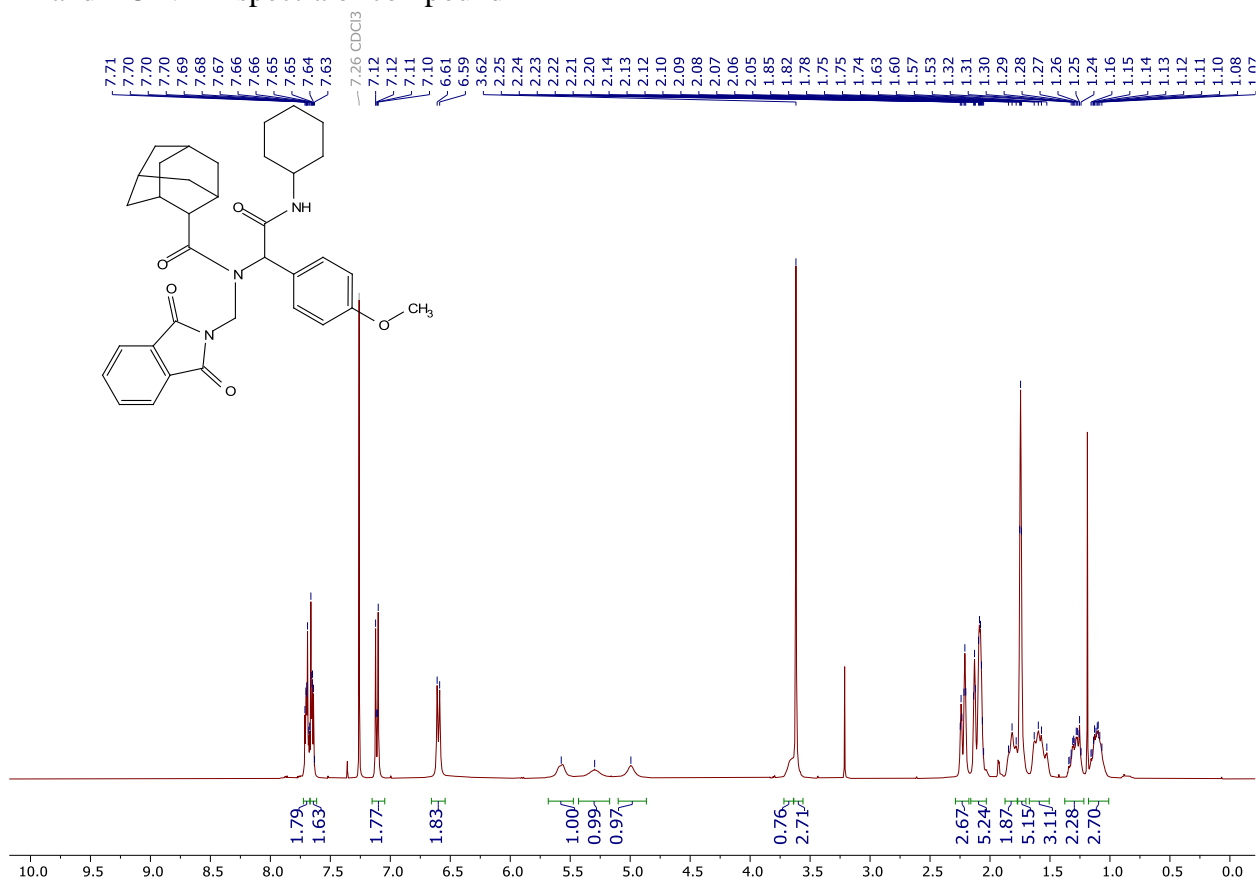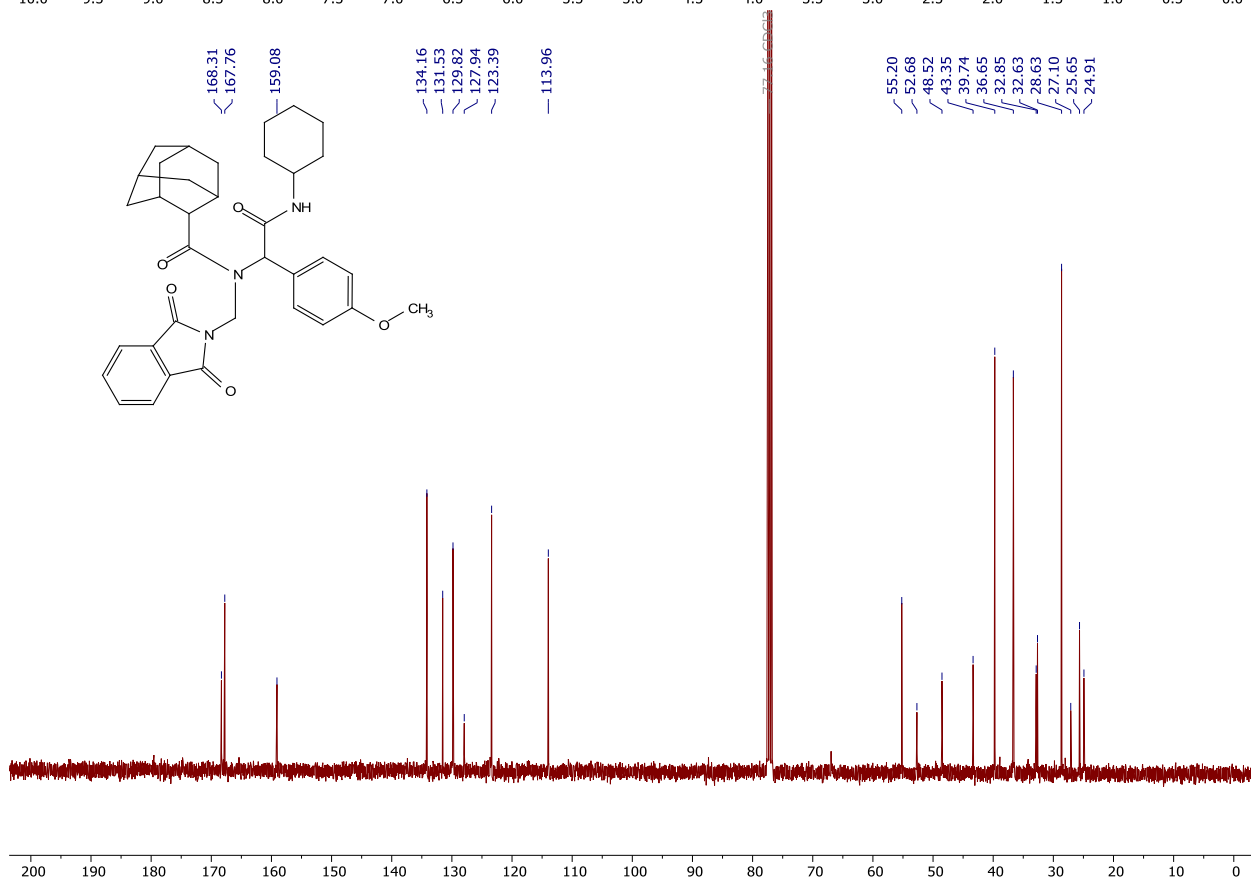

$^1\text{H}$  and  $^{13}\text{C}$  NMR spectra of compound **7g**

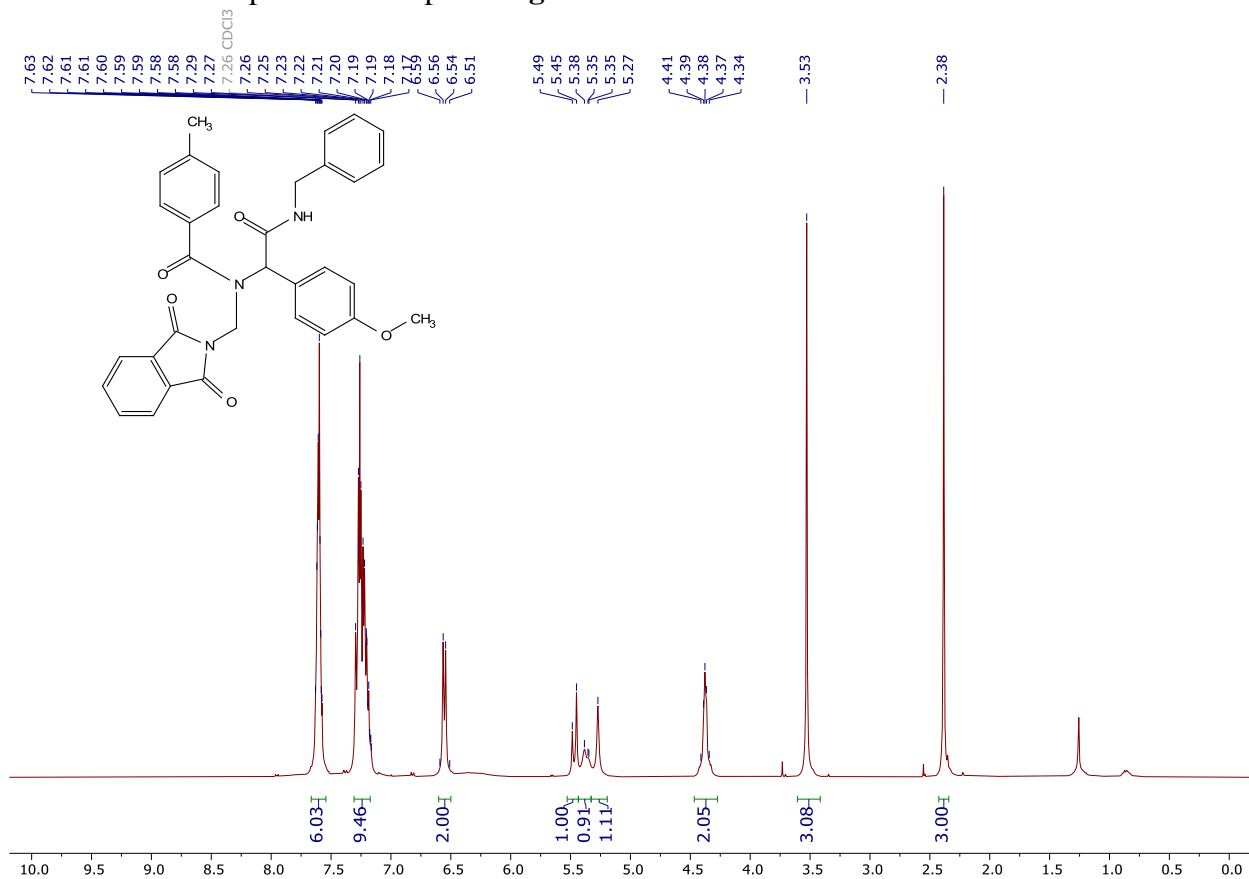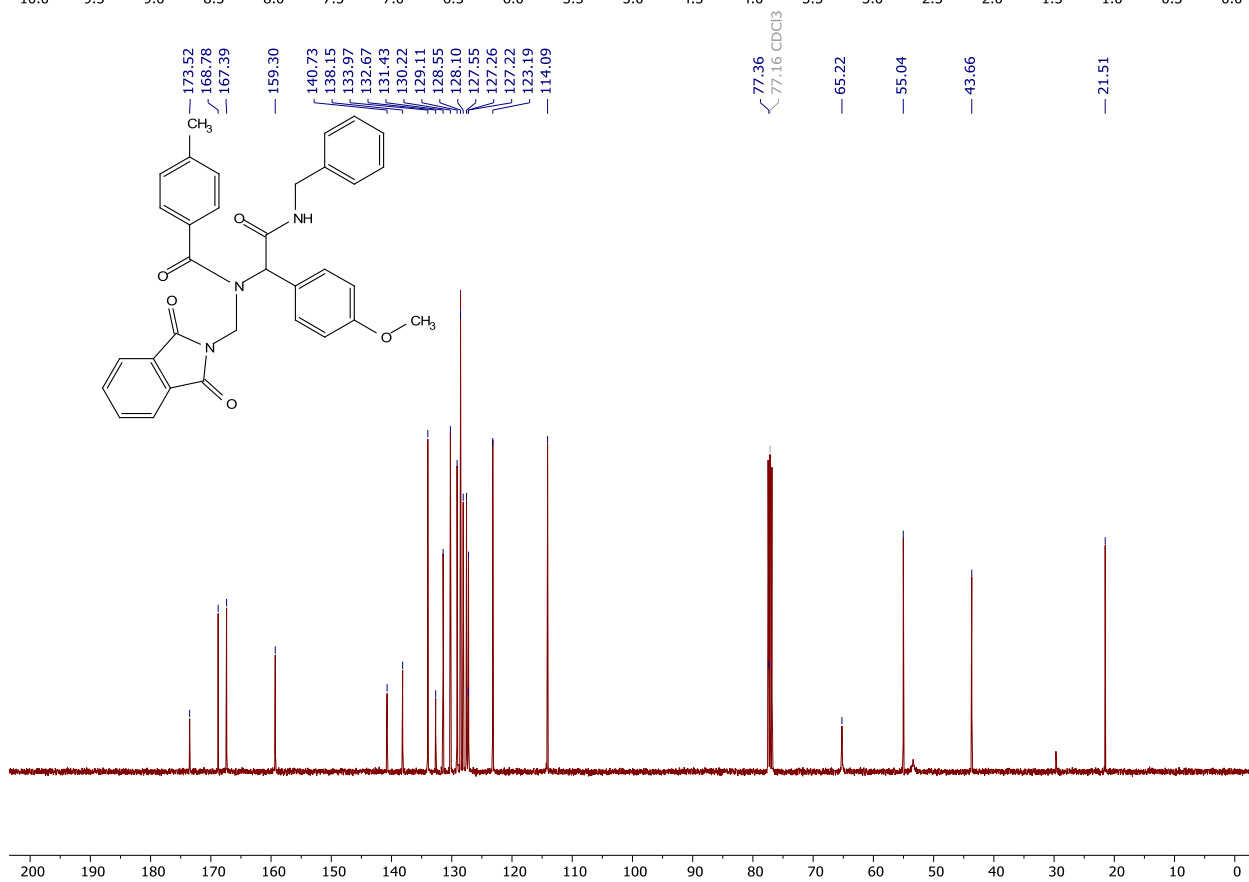

$^1\text{H}$  and  $^{13}\text{C}$  NMR spectra of compound **8a**

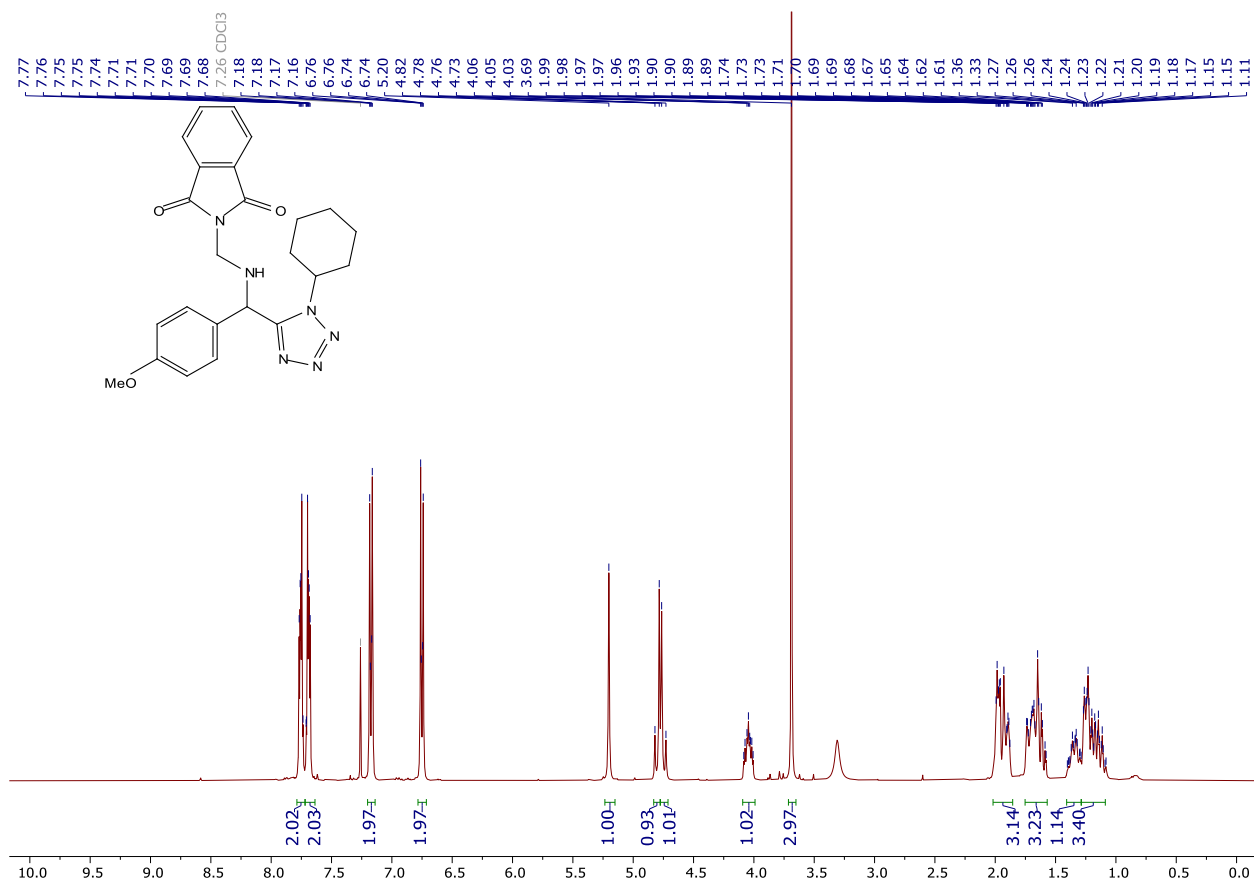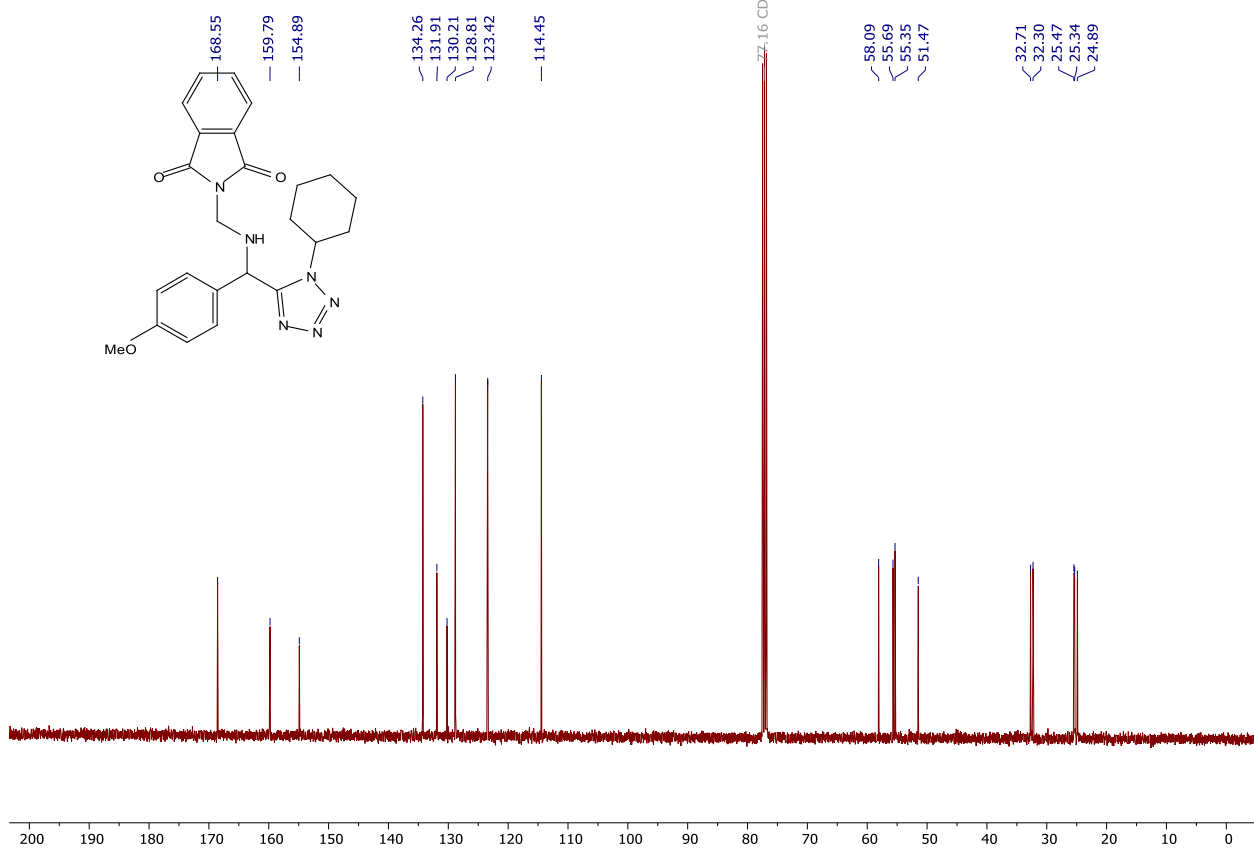

$^1\text{H}$  and  $^{13}\text{C}$  NMR spectra of compound **8b**

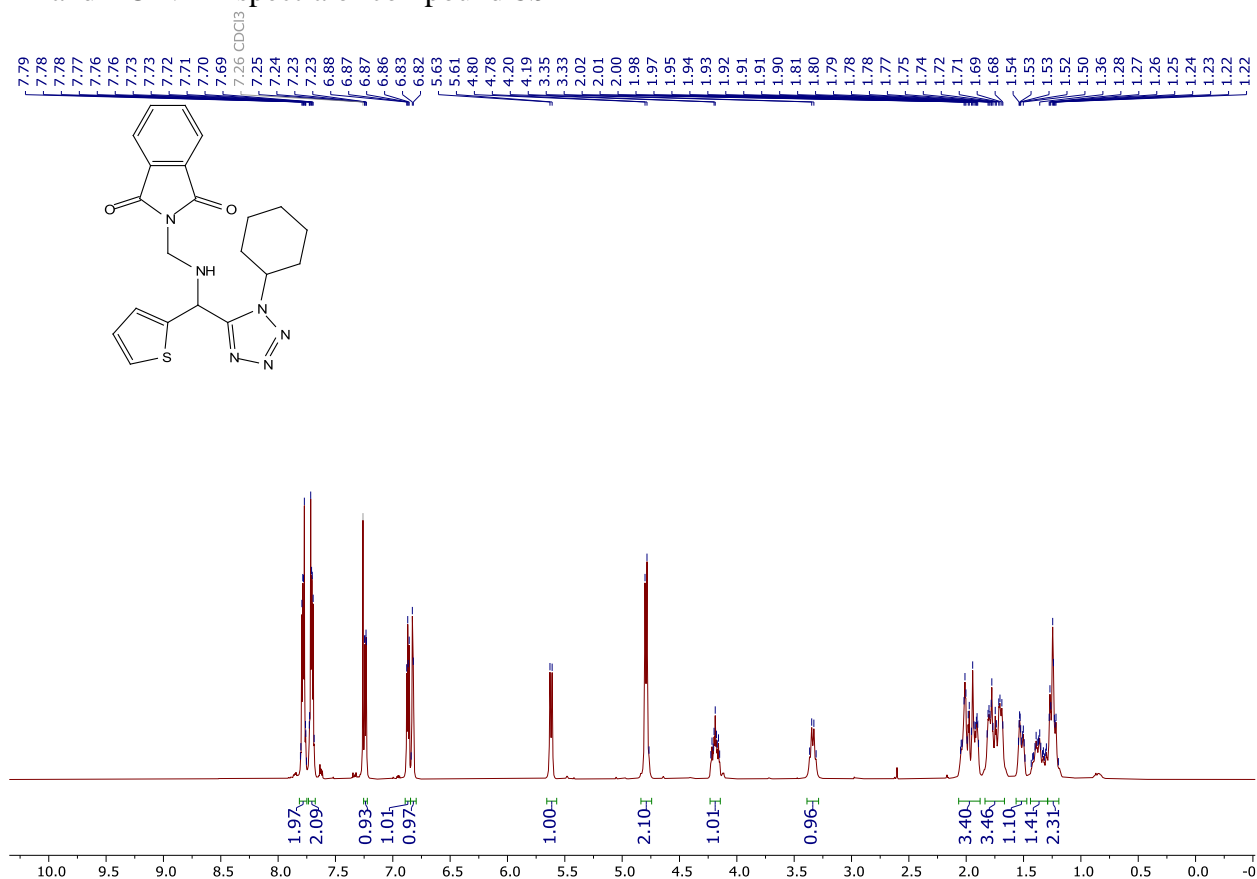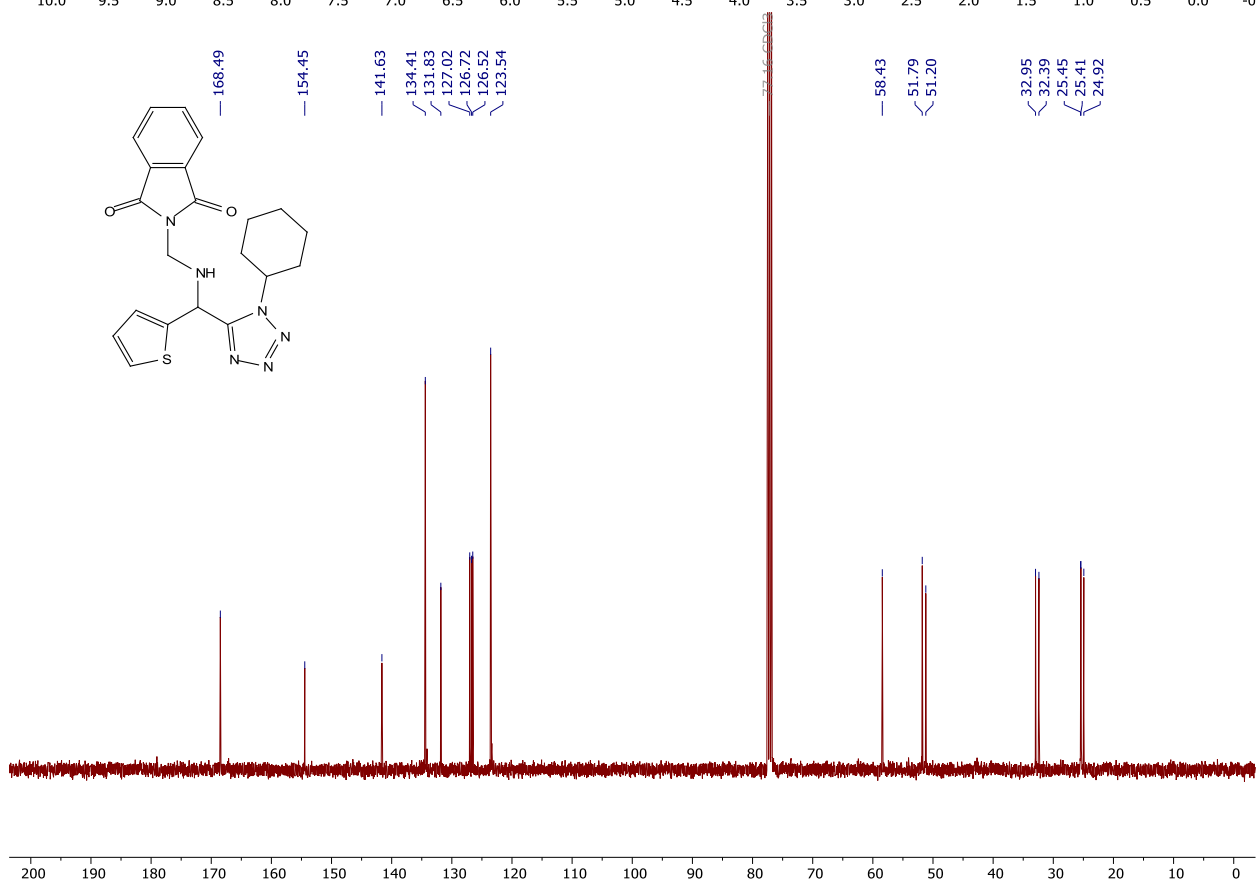



$^1\text{H}$  and  $^{13}\text{C}$  NMR spectra of compound **8c**

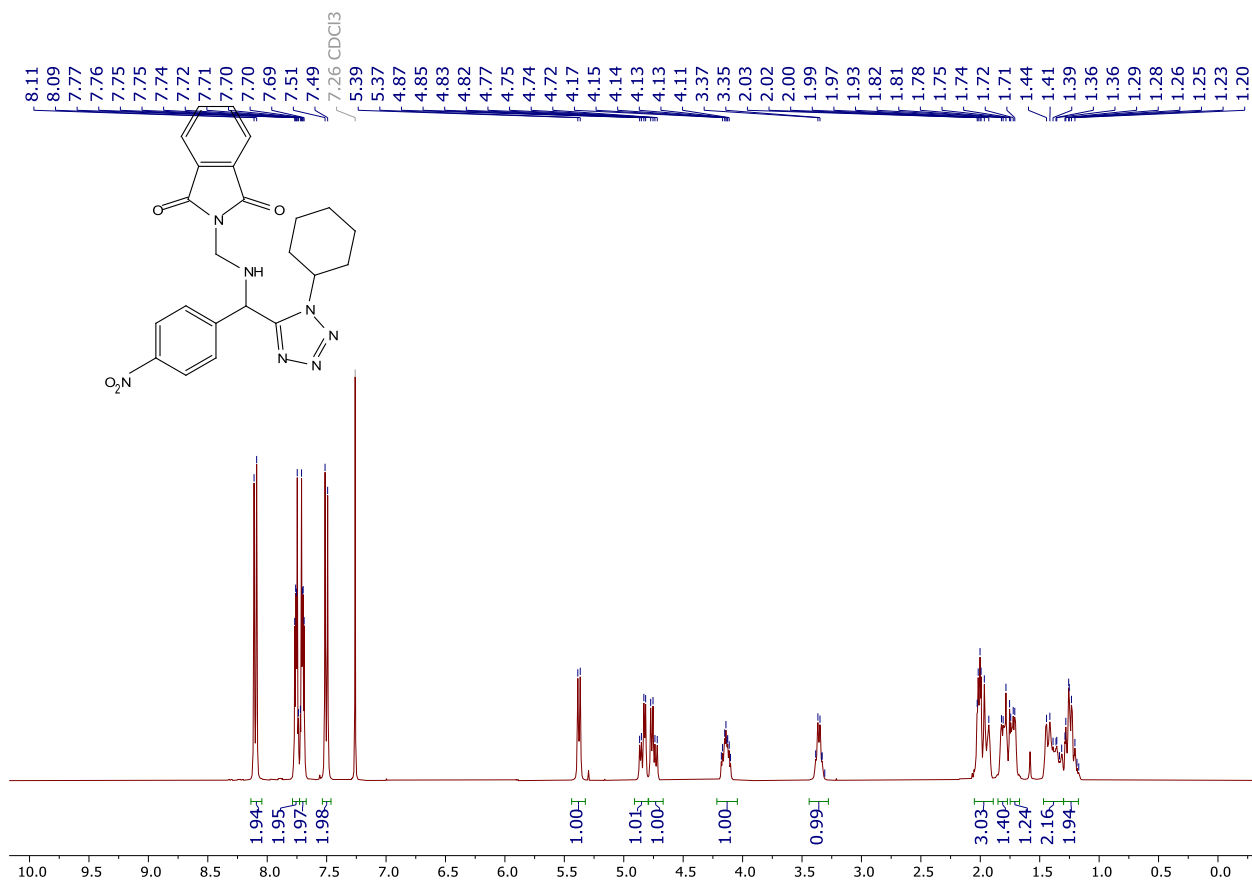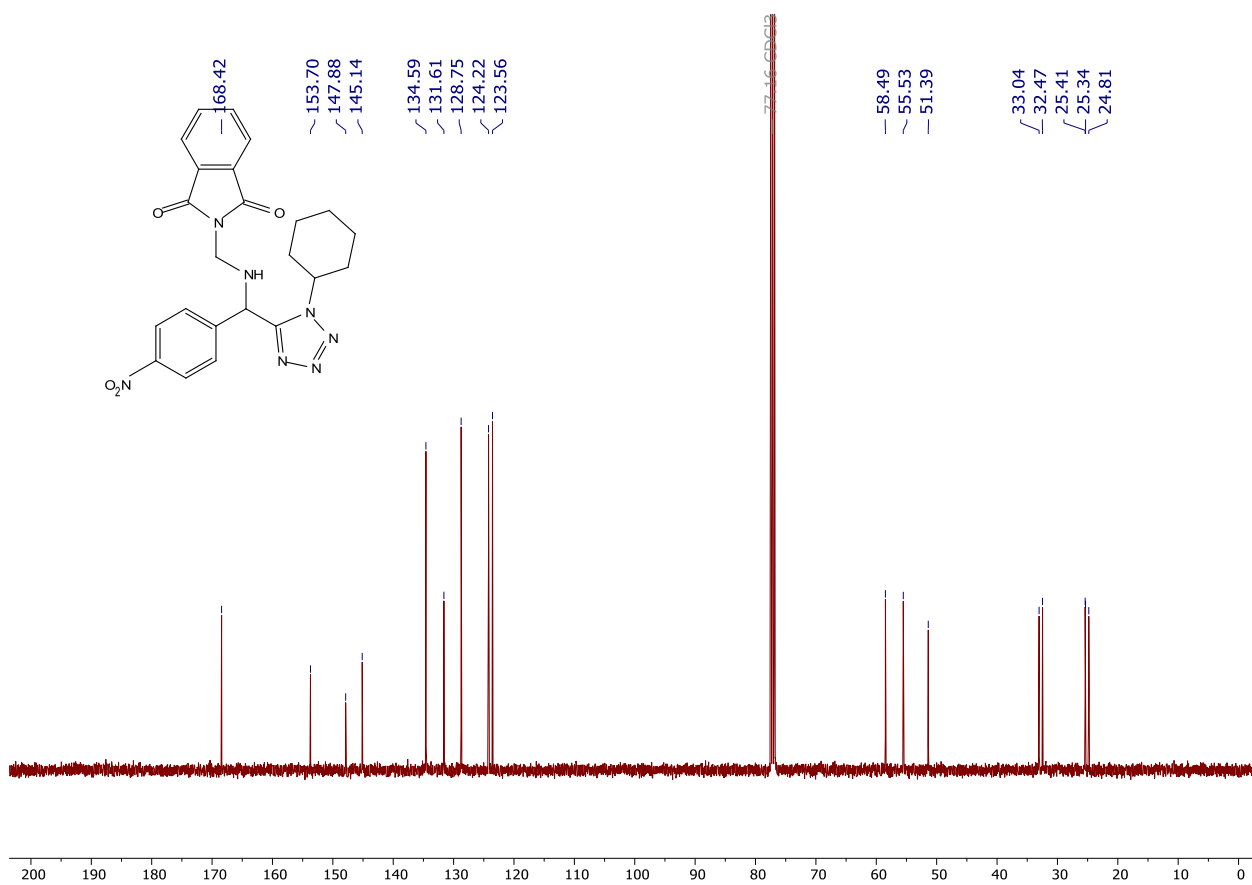

$^1\text{H}$ ,  $^{13}\text{C}$  and  $^{19}\text{F}$  NMR spectra of compound **9**

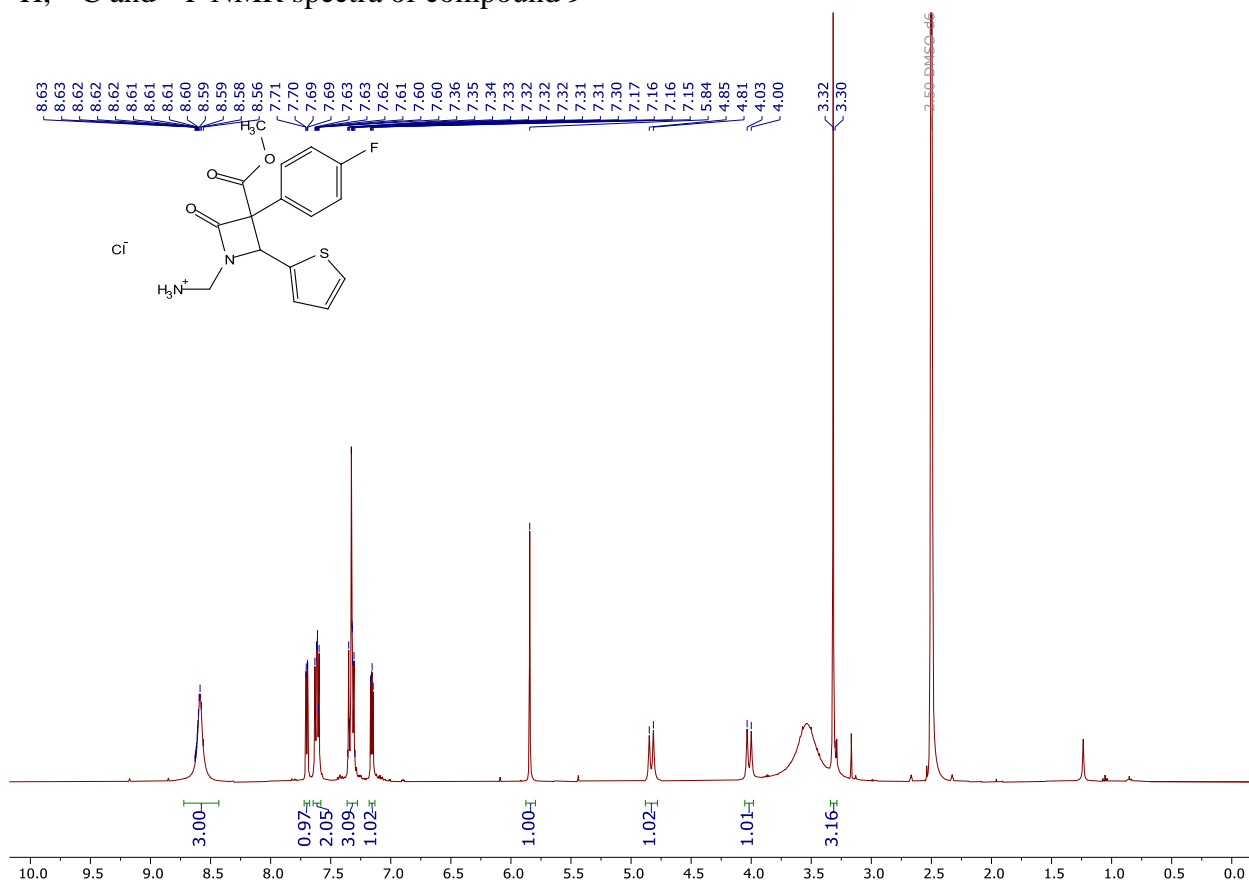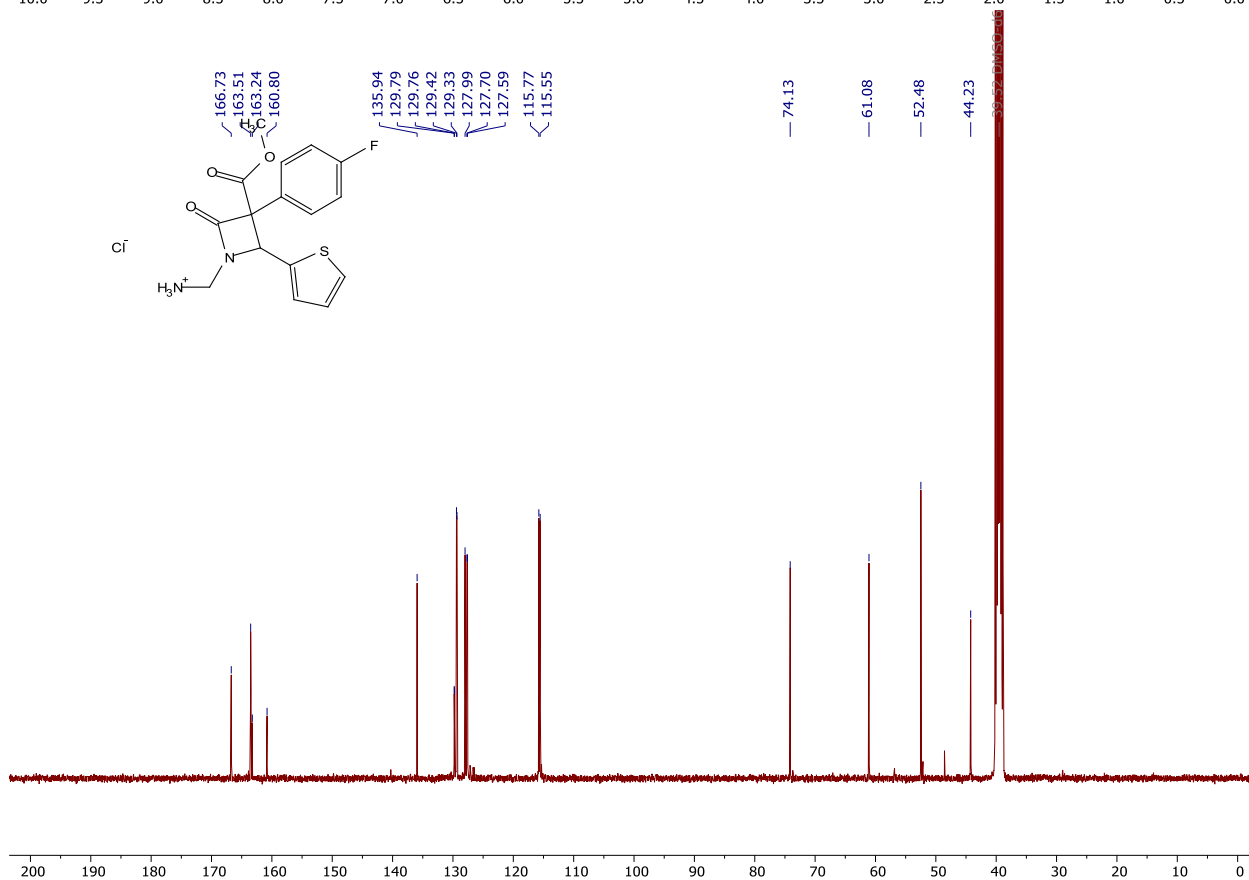

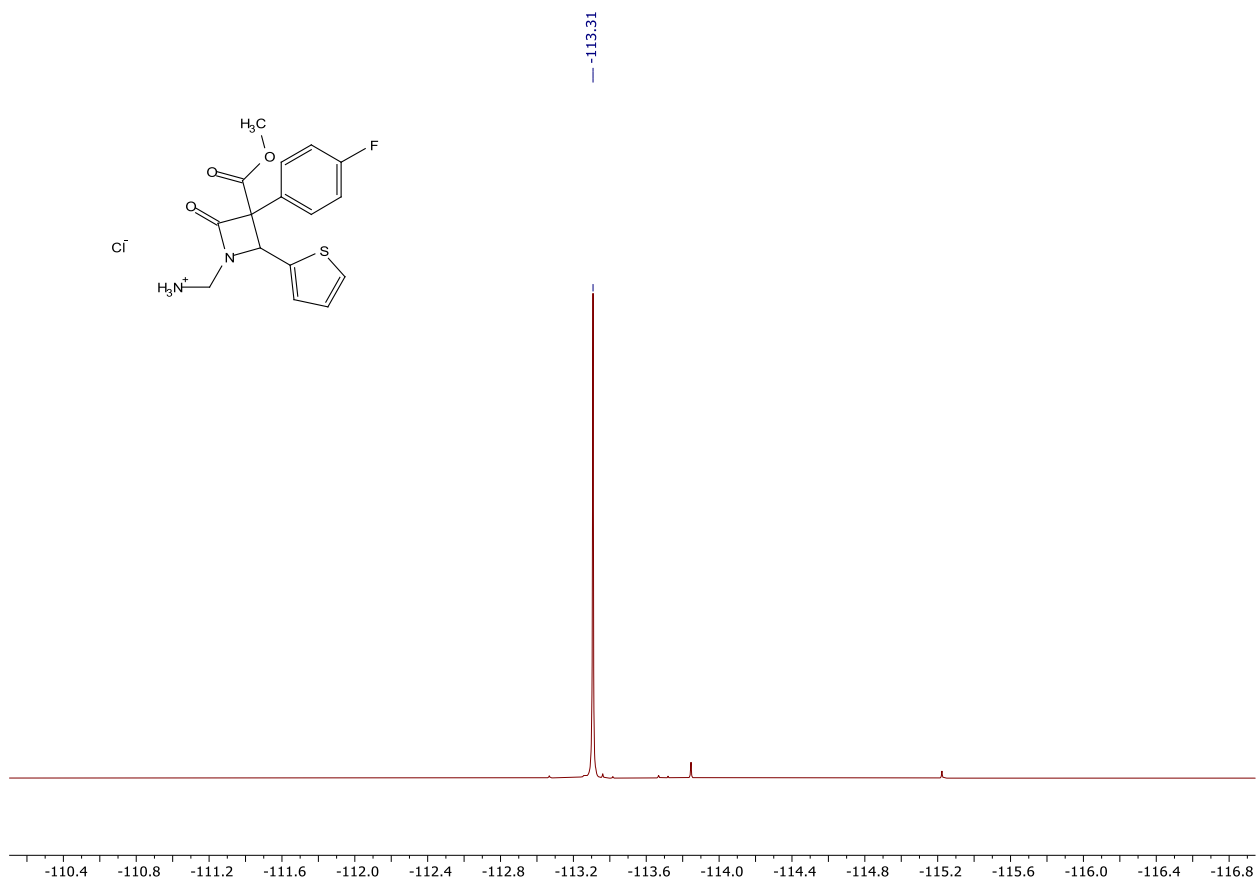

# $^1\text{H}$ and $^{13}\text{C}$ NMR spectra of compound **10**

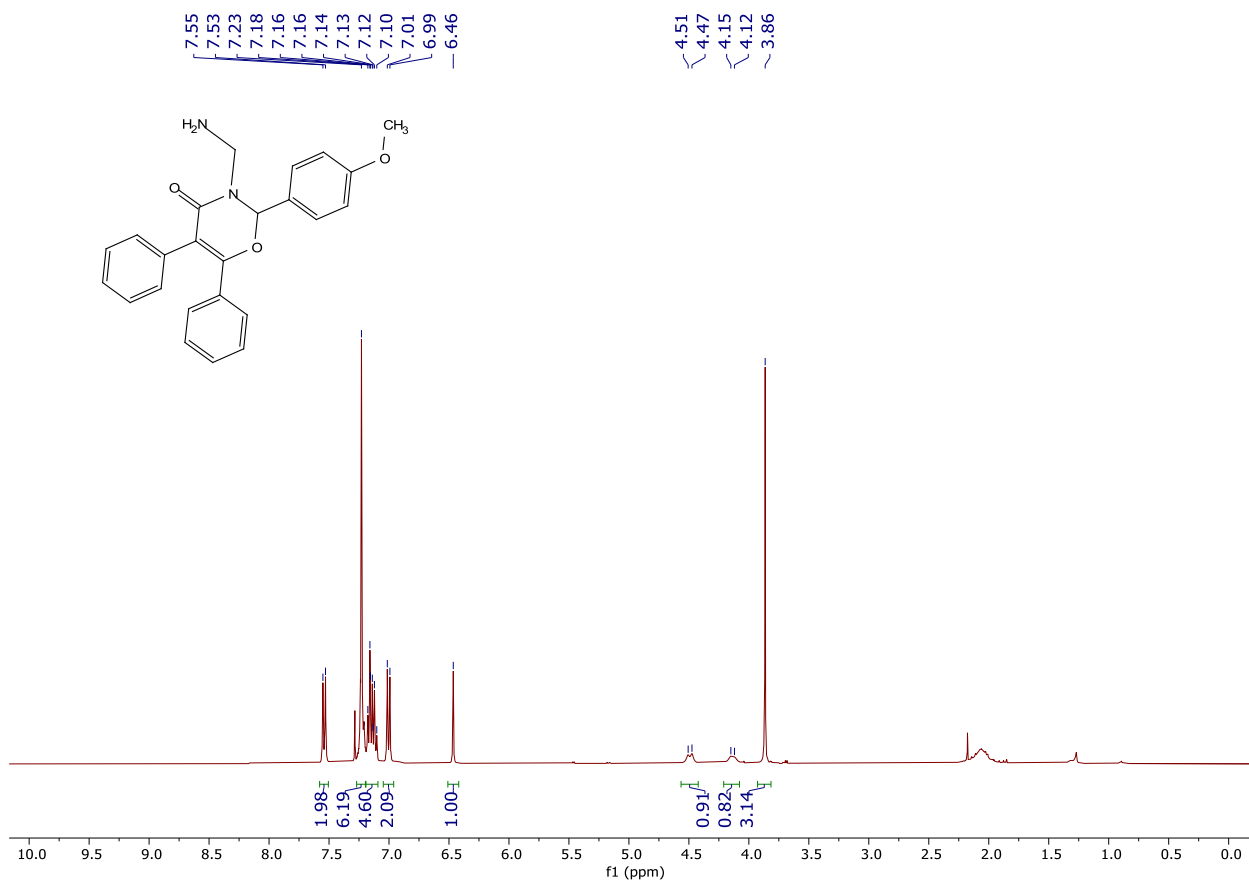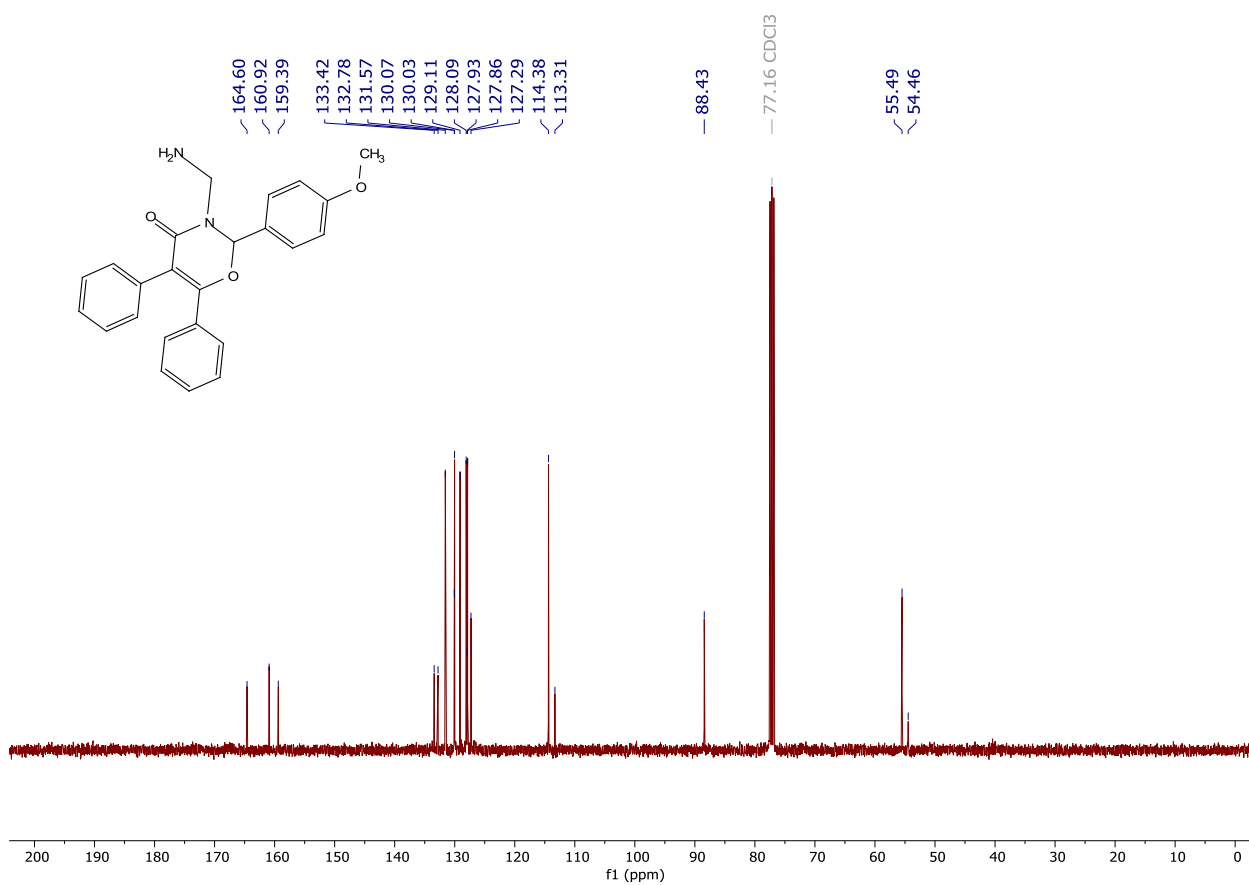

$^1\text{H}$  and  $^{13}\text{C}$  NMR spectra of compound **11**

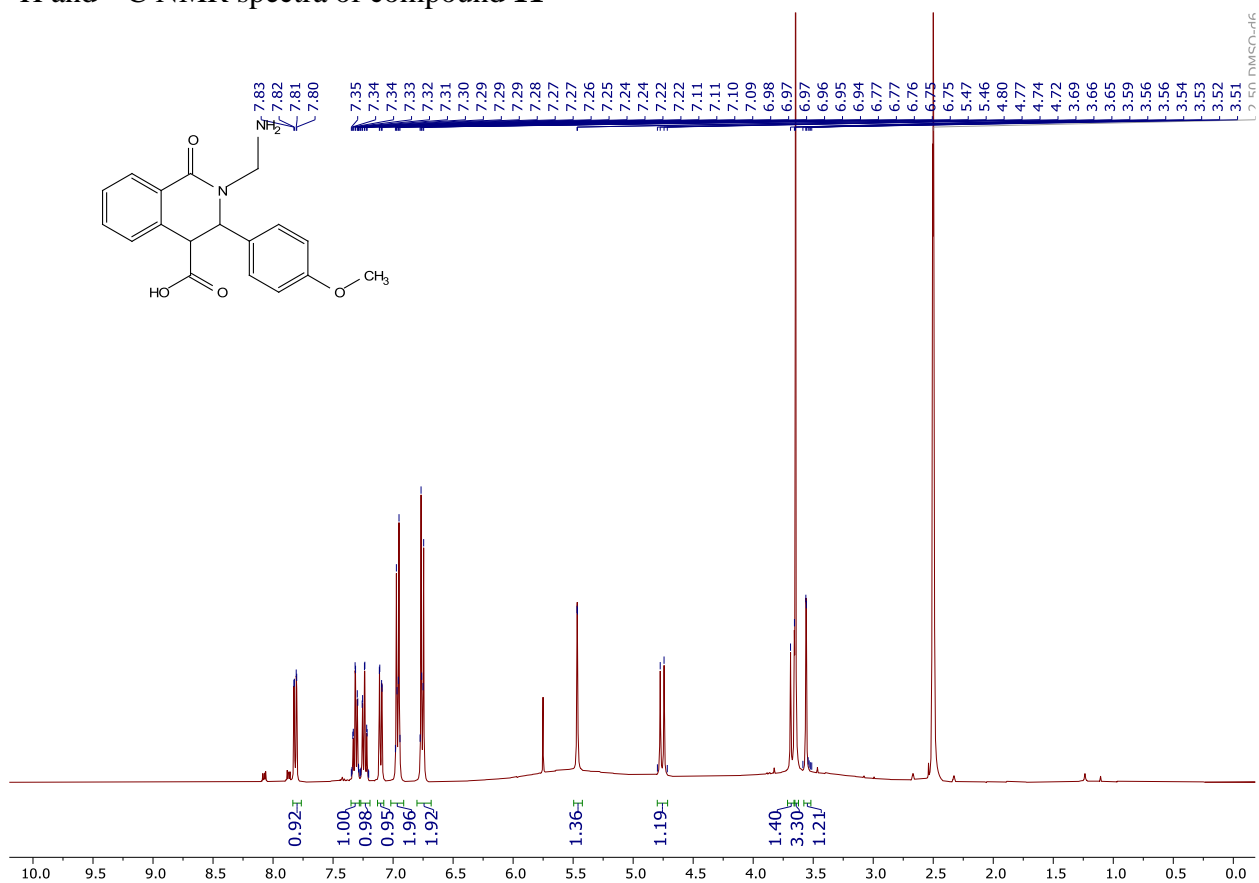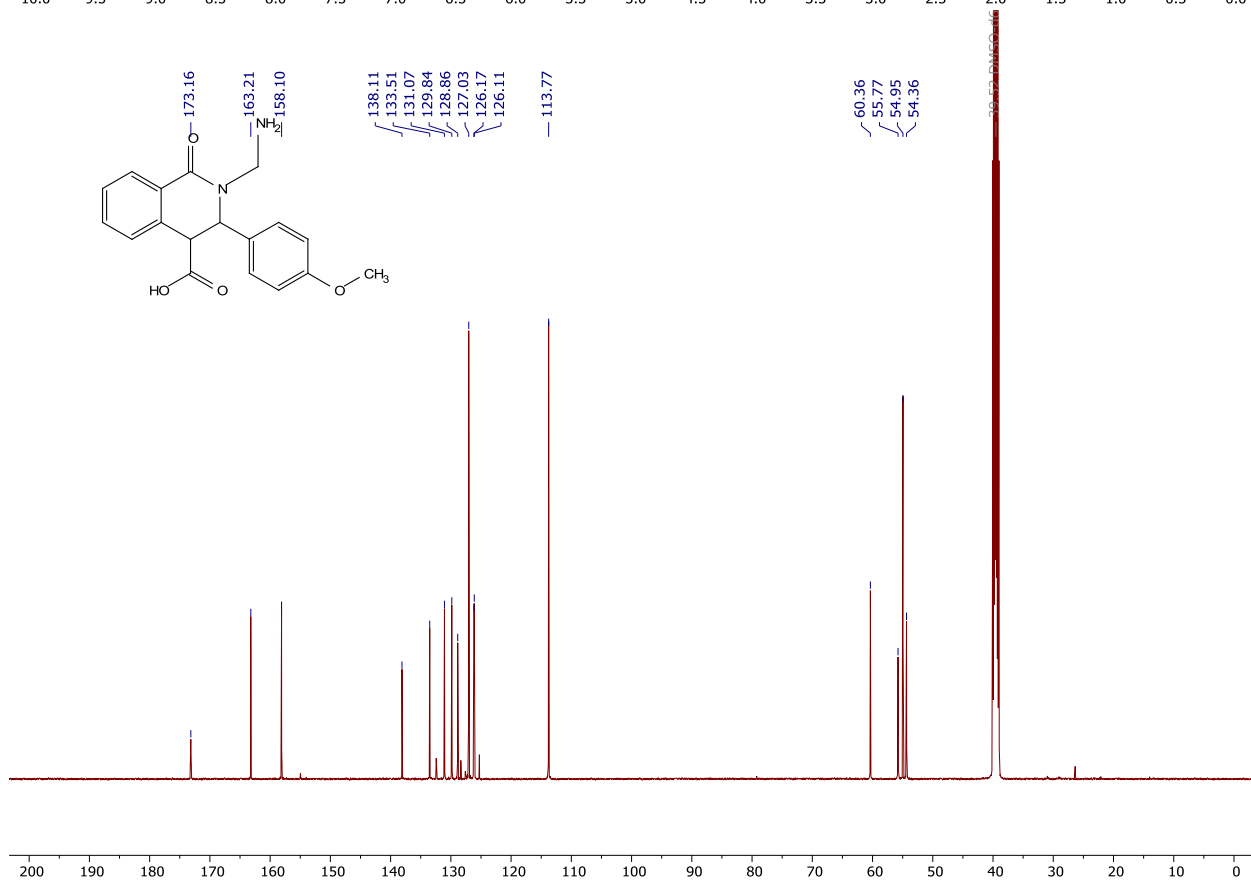

$^1\text{H}$  and  $^{13}\text{C}$  NMR spectra of compound **12**

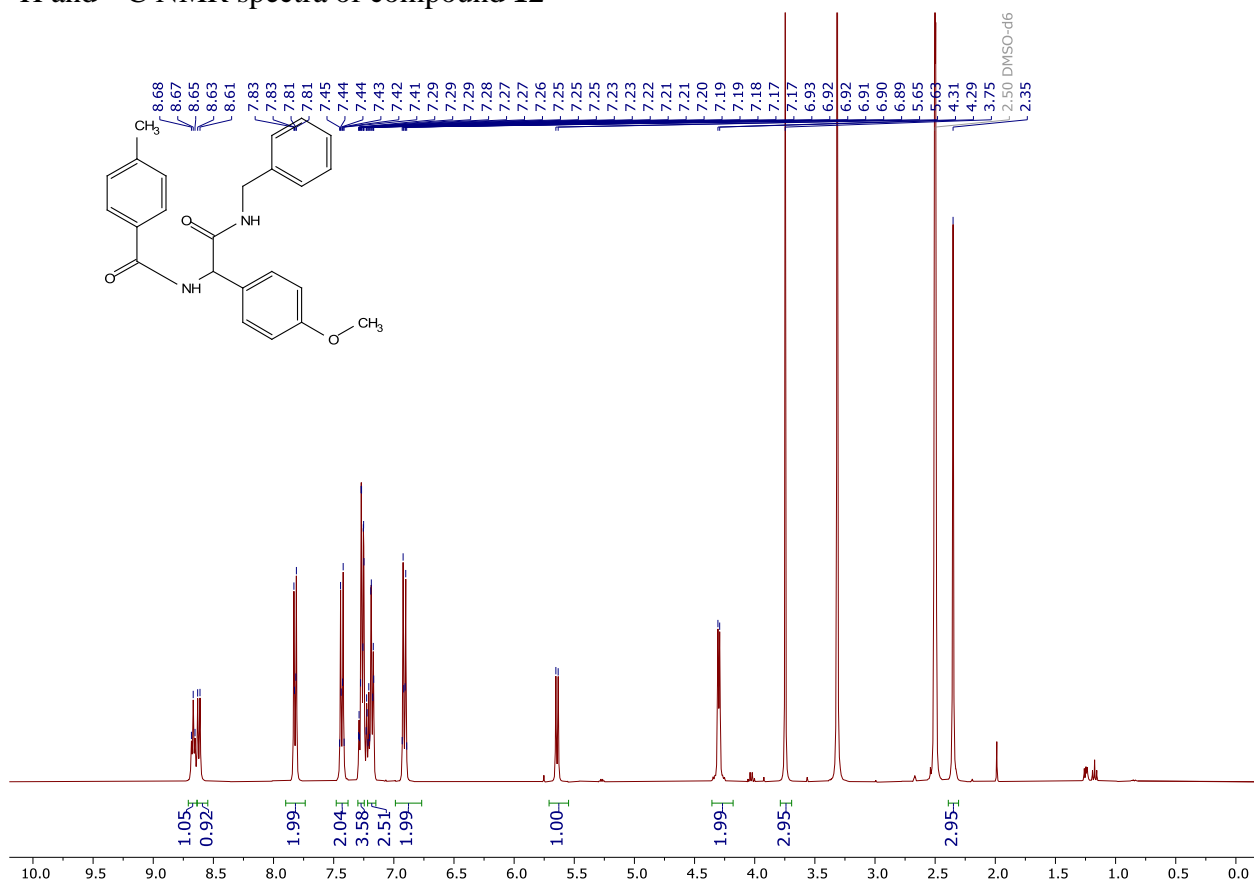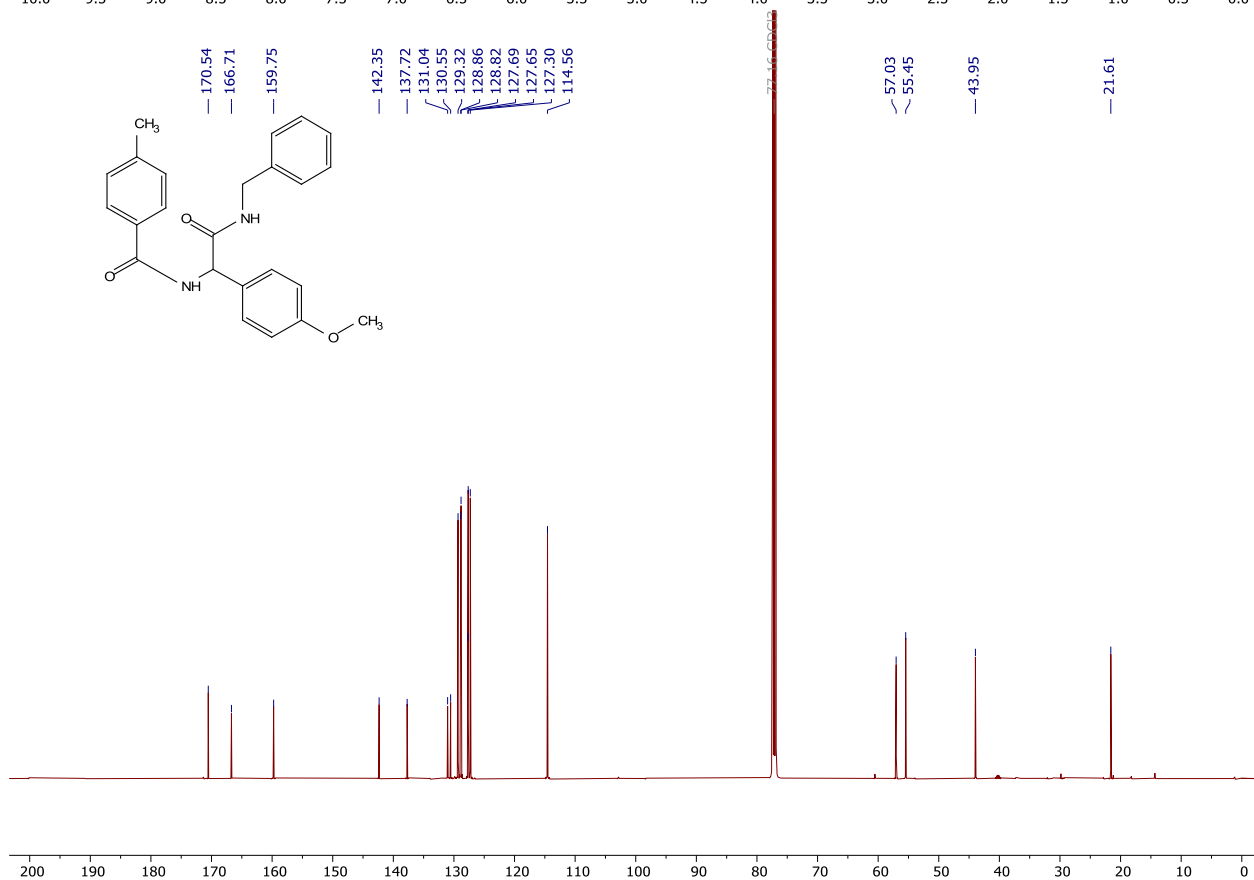

# $^1\text{H}$ and $^{13}\text{C}$ NMR spectra of compound **13**

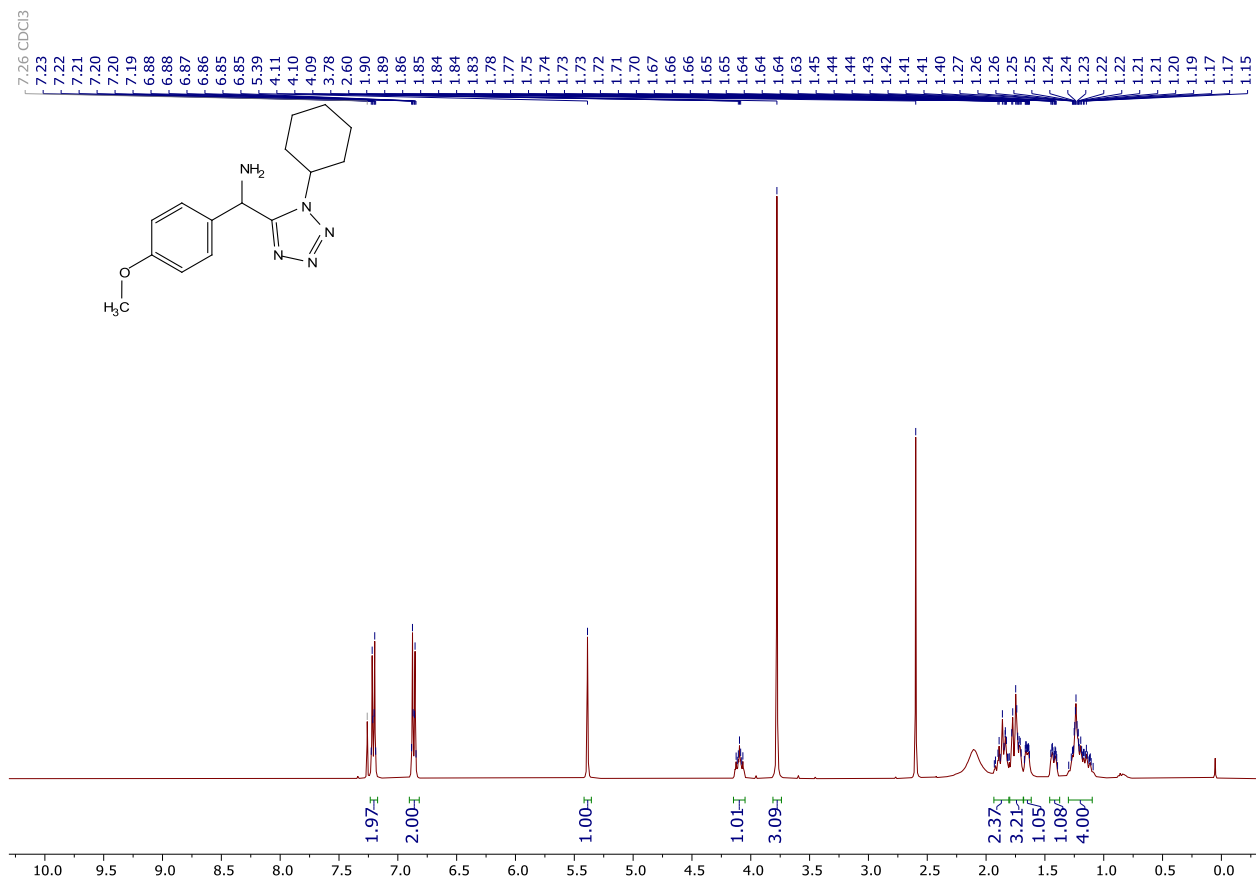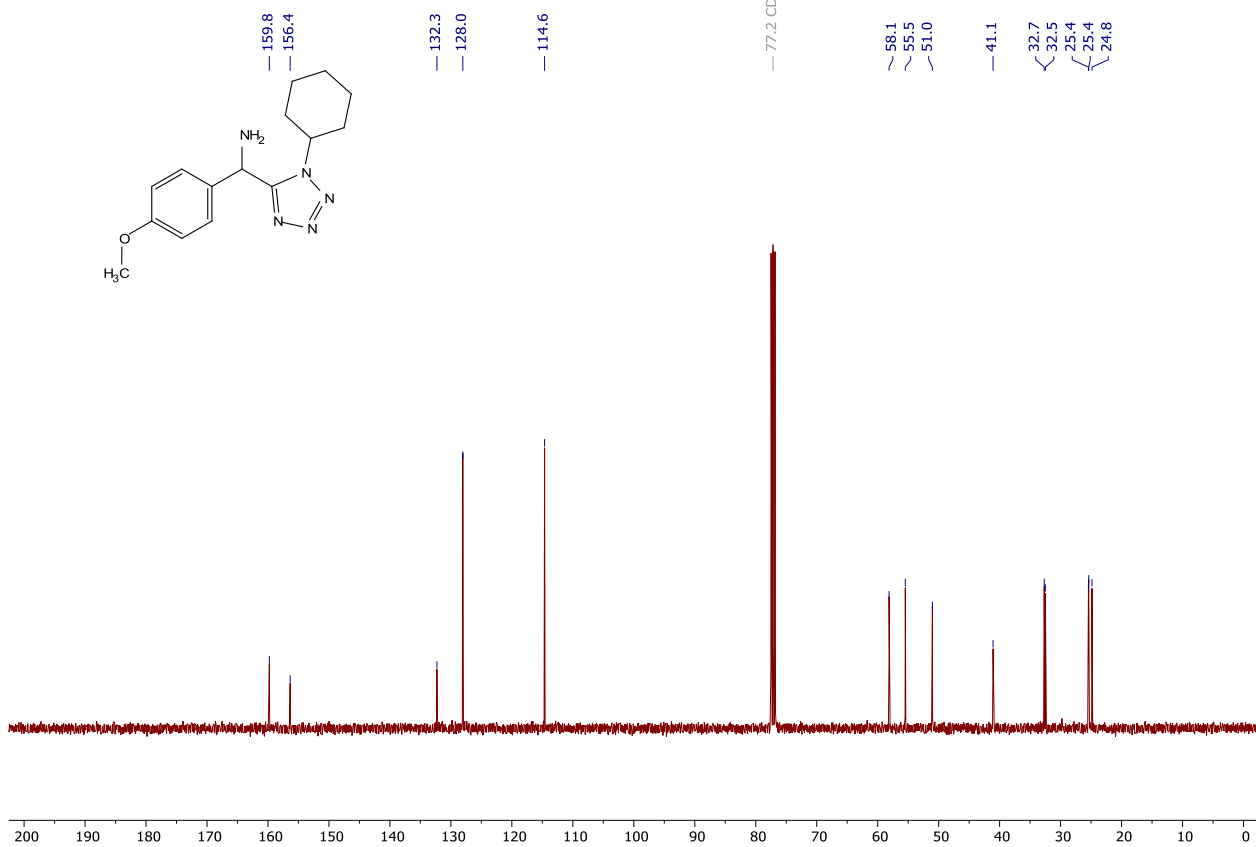

## References

1. Dolomanov, O. V.; Bourhis, L. J.; Gildea, R. J.; Howard, J. A. K.; Puschmann, H., OLEX2: a complete structure solution, refinement and analysis program. *Journal of Applied Crystallography* **2009**, *42* (2), 339-341.
2. Sheldrick, G. M., SHELXT - integrated space-group and crystal-structure determination. *Acta Crystallogr A Found Adv* **2015**, *71* (Pt 1), 3-8.
3. Sheldrick, G. M., Crystal structure refinement with SHELXL. *Acta Crystallogr C Struct Chem* **2015**, *71* (Pt 1), 3-8.
